# Supplementary material for: Identification of the Significant Genes Regulated by Estrogen Receptor in Estrogen Receptor-Positive Breast Cancer and Their Expression Pattern Changes When Tamoxifen or Fulvestrant Resistance Occurs
Source: Front Genet. 2020 Sep 29;11:538734. doi: 10.3389/fgene.2020.538734 (PMC7550672; doi:10.3389/fgene.2020.538734)
Supplement: SUPPLEMENTARY TABLE 2 — The comparison results from GSE27473 dataset (MCF7 parental cells vs. MCF7 cells silencing of ER). [file Table_2.XLSX]

## Sheet: Sheet1
Table S2. The comparison results from GSE27473 dataset (MCF7 parental cells vs. MCF7 cells silencing of ER).
ID	adj.P.Val	P.Value	t	B	logFC	Gene.symbol	Gene.title
209459_s_at	3.29e-12	2.11e-16	-105	27.2385	-7.5	ABAT	4-aminobutyrate aminotransferase
205225_at	3.29e-12	2.19e-16	-105	27.2132	-7.83	ESR1	estrogen receptor 1
225846_at	3.29e-12	3.2e-16	-101	26.951	-7.58	ESRP1	epithelial splicing regulatory protein 1
224650_at	3.29e-12	3.48e-16	-99.8	26.8913	-8.65	MAL2	mal, T-cell differentiation protein 2 (gene/pseudogene)
212148_at	3.29e-12	4.5e-16	-97.2	26.7095	-7.02	PBX1	PBX homeobox 1
228635_at	3.29e-12	4.5e-16	-97.2	26.7088	-6.92	PCDH10	protocadherin 10
1562821_a_at	3.29e-12	4.8e-16	-96.6	26.6625	-8.77	DSCAM-AS1	DSCAM antisense RNA 1
208650_s_at	3.29e-12	5.22e-16	-95.7	26.6016	-7.1	CD24	CD24 molecule
201667_at	3.29e-12	5.42e-16	95.4	26.5753	7.22	GJA1	gap junction protein alpha 1
201131_s_at	3.78e-12	7.31e-16	-92.5	26.3547	-8.42	CDH1	cadherin 1
203953_s_at	3.78e-12	7.61e-16	-92.2	26.3252	-7.81	CLDN3	claudin 3
218186_at	3.88e-12	8.52e-16	-91.1	26.2401	-6.88	RAB25	RAB25, member RAS oncogene family
232164_s_at	3.97e-12	9.72e-16	-89.9	26.1413	-6.53	EPPK1	epiplakin 1
224724_at	3.97e-12	1.1e-15	-88.8	26.0484	-7.57	SULF2	sulfatase 2
200799_at	3.97e-12	1.13e-15	-88.5	26.025	-8.29	HSPA1B///HSPA1A	heat shock protein family A (Hsp70) member 1B///heat shock protein family A (Hsp70) member 1A
201645_at	3.97e-12	1.26e-15	87.6	25.9427	7.43	TNC	tenascin C
226213_at	3.97e-12	1.27e-15	-87.5	25.9378	-6.8	ERBB3	erb-b2 receptor tyrosine kinase 3
201858_s_at	3.97e-12	1.32e-15	87.2	25.9079	8.26	SRGN	serglycin
202712_s_at	3.97e-12	1.45e-15	-86.3	25.833	-6.81	CKMT1A///CKMT1B	creatine kinase, mitochondrial 1A///creatine kinase, mitochondrial 1B
227174_at	3.97e-12	1.49e-15	86.1	25.8121	6.57	WDR72	WD repeat domain 72
216379_x_at	3.97e-12	1.61e-15	-85.5	25.7548	-6.78	CD24	CD24 molecule
1555216_a_at	3.97e-12	1.84e-15	-84.3	25.6503	-6.06	LOC101060604///SLC7A5P2///SLC7A5P1	putative L-type amino acid transporter 1-like protein IMAA///solute carrier family 7 member 5 pseudogene 2///solute carrier family 7 member 5 pseudogene 1
202454_s_at	3.97e-12	1.87e-15	-84.1	25.6355	-6.72	ERBB3	erb-b2 receptor tyrosine kinase 3
239319_at	3.97e-12	1.89e-15	-84.1	25.6268	-6.26	LINC00992	long intergenic non-protein coding RNA 992
227875_at	3.97e-12	2e-15	-83.6	25.5832	-6.11	KLHL13	kelch like family member 13
1553995_a_at	3.97e-12	2.12e-15	83.1	25.5364	6.54	NT5E	5'-nucleotidase ecto
214433_s_at	3.97e-12	2.24e-15	-82.6	25.4935	-6.52	SELENBP1	selenium binding protein 1
225114_at	3.97e-12	2.27e-15	82.5	25.4836	6.25	AGPS	alkylglycerone phosphate synthase
212077_at	3.97e-12	2.37e-15	82.1	25.4469	7.43	CALD1	caldesmon 1
232481_s_at	3.97e-12	2.42e-15	-82	25.4334	-6.64	SLITRK6	SLIT and NTRK like family member 6
226482_s_at	3.97e-12	2.43e-15	-82	25.4287	-6.37	TSTD1	thiosulfate sulfurtransferase like domain containing 1
209173_at	3.97e-12	2.45e-15	-81.9	25.4206	-7.74	AGR2	anterior gradient 2, protein disulphide isomerase family member
217967_s_at	3.97e-12	2.52e-15	81.6	25.3987	6.14	FAM129A	family with sequence similarity 129 member A
211668_s_at	3.97e-12	2.61e-15	81.4	25.3724	7.53	PLAU	plasminogen activator, urokinase
206204_at	3.97e-12	2.7e-15	-81.1	25.3447	-6.31	GRB14	growth factor receptor bound protein 14
203820_s_at	3.97e-12	2.79e-15	80.8	25.3177	6.67	IGF2BP3	insulin like growth factor 2 mRNA binding protein 3
213122_at	3.97e-12	2.81e-15	-80.8	25.3123	-6.1	TSPYL5	TSPY like 5
210372_s_at	3.97e-12	2.86e-15	-80.6	25.2968	-6.97	TPD52L1	tumor protein D52-like 1
222774_s_at	3.97e-12	2.9e-15	-80.5	25.2867	-6.26	NETO2	neuropilin and tolloid like 2
213285_at	3.97e-12	2.91e-15	-80.5	25.2836	-6.56	TMEM30B	transmembrane protein 30B
213131_at	3.97e-12	2.98e-15	-80.3	25.2649	-6.55	OLFM1	olfactomedin 1
209040_s_at	4.01e-12	3.09e-15	80	25.2347	6.02	PSMB8	proteasome subunit beta 8
227550_at	4.01e-12	3.27e-15	-79.5	25.1901	-6.12	GFRA1	GDNF family receptor alpha 1
212977_at	4.01e-12	3.33e-15	-79.4	25.1749	-5.8	ACKR3	atypical chemokine receptor 3
224710_at	4.01e-12	3.38e-15	79.3	25.1619	6.02	NARR///RAB34	nine-amino acid residue-repeats///RAB34, member RAS oncogene family
225996_at	4.01e-12	3.41e-15	-79.2	25.1548	-5.78	LONRF2	LON peptidase N-terminal domain and ring finger 2
209771_x_at	4.01e-12	3.45e-15	-79.1	25.146	-6.71	CD24	CD24 molecule
225782_at	4.06e-12	3.56e-15	78.8	25.1203	6.22	MSRB3	methionine sulfoxide reductase B3
218885_s_at	4.11e-12	3.68e-15	-78.6	25.0929	-6.52	GALNT12	polypeptide N-acetylgalactosaminyltransferase 12
1559258_a_at	4.2e-12	3.84e-15	78.2	25.058	6.32	CT83	cancer/testis antigen 83
219121_s_at	4.6e-12	4.43e-15	-77.1	24.9418	-5.96	ESRP1	epithelial splicing regulatory protein 1
209696_at	4.6e-12	4.46e-15	-77.1	24.9357	-6.8	FBP1	fructose-bisphosphatase 1
224996_at	4.6e-12	4.47e-15	77	24.933	6.34	ASPH	aspartate beta-hydroxylase
217997_at	4.6e-12	4.58e-15	76.9	24.9131	5.95	PHLDA1	pleckstrin homology like domain family A member 1
213113_s_at	4.6e-12	4.63e-15	76.8	24.9052	6.27	SLC43A3	solute carrier family 43 member 3
203954_x_at	4.63e-12	4.74e-15	-76.6	24.8849	-6.28	CLDN3	claudin 3
225285_at	4.65e-12	4.88e-15	76.4	24.8615	7.58	BCAT1	branched chain amino acid transaminase 1
228462_at	4.65e-12	5.07e-15	-76.1	24.829	-6.12	IRX2	iroquois homeobox 2
202149_at	4.65e-12	5.12e-15	-76	24.8219	-5.64	NEDD9	neural precursor cell expressed, developmentally down-regulated 9
205548_s_at	4.65e-12	5.17e-15	75.9	24.8132	7.21	BTG3	BTG anti-proliferation factor 3
202759_s_at	4.65e-12	5.2e-15	75.9	24.8088	7	PALM2-AKAP2///AKAP2	PALM2-AKAP2 readthrough///A-kinase anchoring protein 2
202890_at	4.65e-12	5.28e-15	-75.8	24.7952	-5.91	MAP7	microtubule associated protein 7
210692_s_at	4.65e-12	5.35e-15	75.7	24.784	5.78	SLC43A3	solute carrier family 43 member 3
206343_s_at	4.69e-12	5.66e-15	75.2	24.738	5.41	NRG1	neuregulin 1
225911_at	4.69e-12	5.72e-15	-75.2	24.7295	-5.85	NPNT	nephronectin
227801_at	4.69e-12	5.79e-15	-75.1	24.719	-6.39	TRIM59	tripartite motif containing 59
210896_s_at	4.69e-12	5.82e-15	75	24.7138	5.79	ASPH	aspartate beta-hydroxylase
228956_at	4.69e-12	5.83e-15	75	24.7134	5.71	UGT8	UDP glycosyltransferase 8
242093_at	4.88e-12	6.16e-15	-74.6	24.6669	-5.51	SYTL5	synaptotagmin like 5
204268_at	4.91e-12	6.32e-15	74.4	24.6449	5.38	S100A2	S100 calcium binding protein A2
222830_at	4.91e-12	6.38e-15	-74.3	24.6377	-5.52	GRHL1	grainyhead like transcription factor 1
204823_at	5.03e-12	6.62e-15	74	24.6066	6.12	NAV3	neuron navigator 3
201272_at	5.04e-12	6.76e-15	73.9	24.589	6.52	AKR1B1	aldo-keto reductase family 1 member B
221666_s_at	5.04e-12	6.82e-15	-73.8	24.5819	-5.95	PYCARD	PYD and CARD domain containing
213134_x_at	5.18e-12	7.2e-15	73.4	24.5352	7.07	BTG3	BTG anti-proliferation factor 3
242005_at	5.18e-12	7.22e-15	73.4	24.5331	6.24	LINC00973	long intergenic non-protein coding RNA 973
224833_at	5.18e-12	7.33e-15	73.3	24.5206	6.85	ETS1	ETS proto-oncogene 1, transcription factor
210664_s_at	5.18e-12	7.39e-15	73.2	24.5134	6.5	TFPI	tissue factor pathway inhibitor
223551_at	5.18e-12	7.48e-15	-73.1	24.5034	-6.42	PKIB	protein kinase (cAMP-dependent, catalytic) inhibitor beta
201012_at	5.24e-12	7.74e-15	72.9	24.4746	5.79	ANXA1	annexin A1
212097_at	5.24e-12	7.92e-15	72.7	24.455	5.95	CAV1	caveolin 1
235976_at	5.24e-12	7.98e-15	-72.7	24.4483	-6.63	SLITRK6	SLIT and NTRK like family member 6
211712_s_at	5.24e-12	7.99e-15	-72.6	24.4474	-5.4	ANXA9	annexin A9
232165_at	5.24e-12	8.17e-15	-72.5	24.4287	-6.13	EPPK1	epiplakin 1
225647_s_at	5.24e-12	8.2e-15	72.5	24.4261	6.74	CTSC	cathepsin C
209604_s_at	5.24e-12	8.24e-15	-72.4	24.4212	-5.68	GATA3	GATA binding protein 3
210387_at	5.43e-12	8.65e-15	-72.1	24.3803	-6.03	HIST1H2BJ///HIST1H2BG	histone cluster 1, H2bj///histone cluster 1, H2bg
1553179_at	5.45e-12	8.77e-15	-72	24.3683	-5.72	ADAMTS19	ADAM metallopeptidase with thrombospondin type 1 motif 19
203910_at	5.47e-12	9e-15	71.8	24.346	5.23	ARHGAP29	Rho GTPase activating protein 29
235247_at	5.47e-12	9.01e-15	-71.8	24.345	-5.2
205709_s_at	5.47e-12	9.34e-15	-71.5	24.3144	-5.65	CDS1	CDP-diacylglycerol synthase 1
225793_at	5.47e-12	9.35e-15	71.5	24.3136	5.61	LIX1L	limb and CNS expressed 1 like
206332_s_at	5.47e-12	9.53e-15	71.4	24.2972	7.09	IFI16	interferon gamma inducible protein 16
1552797_s_at	5.47e-12	9.63e-15	-71.3	24.2885	-5.63	PROM2	prominin 2
206658_at	5.47e-12	9.79e-15	-71.2	24.2747	-5.67	UPK3B	uroplakin 3B
204567_s_at	5.47e-12	9.8e-15	-71.2	24.274	-5.85	ABCG1	ATP binding cassette subfamily G member 1
201325_s_at	5.47e-12	9.85e-15	71.1	24.2695	6.08	EMP1	epithelial membrane protein 1
226302_at	5.47e-12	9.89e-15	-71.1	24.2658	-5.2	ATP8B1	ATPase phospholipid transporting 8B1
209772_s_at	5.47e-12	1e-14	-71	24.2566	-6.03	CD24	CD24 molecule
201617_x_at	5.47e-12	1e-14	71	24.2562	5.45	CALD1	caldesmon 1
213233_s_at	5.53e-12	1.02e-14	-70.9	24.2376	-5.89	KLHL9	kelch like family member 9
201487_at	5.6e-12	1.05e-14	70.7	24.2183	5.67	CTSC	cathepsin C
205767_at	5.61e-12	1.07e-14	70.6	24.2021	5.33	EREG	epiregulin
1555630_a_at	5.61e-12	1.08e-14	70.5	24.1917	6.51	NARR///RAB34	nine-amino acid residue-repeats///RAB34, member RAS oncogene family
226129_at	5.61e-12	1.09e-14	-70.4	24.1822	-6.32	FAM83H	family with sequence similarity 83 member H
212764_at	5.61e-12	1.1e-14	70.4	24.1773	6.52	ZEB1	zinc finger E-box binding homeobox 1
226789_at	5.61e-12	1.1e-14	-70.4	24.1767	-5.61	EMB	embigin
209603_at	5.71e-12	1.13e-14	-70.2	24.1533	-5.78	GATA3	GATA binding protein 3
205549_at	5.86e-12	1.18e-14	-69.9	24.1169	-6.12	PCP4	Purkinje cell protein 4
266_s_at	5.86e-12	1.18e-14	-69.8	24.1145	-7.05	CD24	CD24 molecule
218322_s_at	5.9e-12	1.2e-14	69.7	24.0961	5.24	ACSL5	acyl-CoA synthetase long-chain family member 5
209460_at	5.9e-12	1.21e-14	-69.7	24.0934	-5.9	ABAT	4-aminobutyrate aminotransferase
217562_at	5.92e-12	1.22e-14	-69.6	24.083	-5.61	BRINP3	BMP/retinoic acid inducible neural specific 3
229377_at	5.95e-12	1.24e-14	-69.5	24.0706	-5.46	GRTP1	growth hormone regulated TBC protein 1
209270_at	6.17e-12	1.3e-14	69.2	24.0314	5.5	LAMB3	laminin subunit beta 3
222773_s_at	6.23e-12	1.32e-14	-69	24.0137	-5.43	GALNT12	polypeptide N-acetylgalactosaminyltransferase 12
205591_at	6.23e-12	1.33e-14	-69	24.0082	-5.19	OLFM1	olfactomedin 1
202499_s_at	6.23e-12	1.34e-14	68.9	24.0014	5.21	SLC2A3	solute carrier family 2 member 3
201565_s_at	6.23e-12	1.36e-14	-68.9	23.9936	-6.74	ID2	inhibitor of DNA binding 2, HLH protein
203895_at	6.33e-12	1.39e-14	-68.7	23.9715	-5.49	PLCB4	phospholipase C beta 4
211421_s_at	6.33e-12	1.4e-14	-68.6	23.9656	-5.71	RET	ret proto-oncogene
213258_at	6.68e-12	1.49e-14	68.2	23.9116	6.55	TFPI	tissue factor pathway inhibitor
226863_at	6.87e-12	1.55e-14	-67.9	23.8793	-5.5	FAM110C	family with sequence similarity 110 member C
204955_at	6.88e-12	1.56e-14	67.9	23.8711	5.49	SRPX	sushi repeat containing protein, X-linked
212062_at	6.92e-12	1.59e-14	-67.8	23.8562	-5.15	ATP9A	ATPase phospholipid transporting 9A (putative)
208651_x_at	6.92e-12	1.61e-14	-67.7	23.8436	-5.53	CD24	CD24 molecule
219388_at	6.92e-12	1.61e-14	-67.7	23.8419	-5.45	GRHL2	grainyhead like transcription factor 2
203786_s_at	6.92e-12	1.65e-14	-67.5	23.8224	-6.58	TPD52L1	tumor protein D52-like 1
203407_at	6.92e-12	1.65e-14	-67.5	23.8199	-6.13	PPL	periplakin
227629_at	6.92e-12	1.67e-14	-67.4	23.8119	-5.1	PRLR	prolactin receptor
230163_at	6.92e-12	1.69e-14	-67.4	23.8029	-5.5	GFRA1	GDNF family receptor alpha 1
207761_s_at	6.92e-12	1.7e-14	-67.3	23.7972	-5.36	METTL7A	methyltransferase like 7A
231265_at	6.92e-12	1.7e-14	67.3	23.7962	6.03	COX7B2	cytochrome c oxidase subunit 7B2
223435_s_at	6.92e-12	1.7e-14	-67.3	23.7952	-5.3	PCDHA1///PCDHA2///PCDHA3///PCDHA4///PCDHA5///PCDHA6///PCDHA7///PCDHA8///PCDHA10///PCDHA11///PCDHA12///PCDHA13///PCDHAC1///PCDHAC2///PCDHA9	protocadherin alpha 1///protocadherin alpha 2///protocadherin alpha 3///protocadherin alpha 4///protocadherin alpha 5///protocadherin alpha 6///protocadherin alpha 7///protocadherin alpha 8///protocadherin alpha 10///protocadherin alpha 11///protocadherin alpha 12///protocadherin alpha 13///protocadherin alpha subfamily C, 1///protocadherin alpha subfamily C, 2///protocadherin alpha 9
213010_at	6.92e-12	1.71e-14	67.3	23.7911	6.44	PRKCDBP	protein kinase C delta binding protein
228573_at	7.14e-12	1.78e-14	67	23.7577	5.38	ANTXR2	anthrax toxin receptor 2
229964_at	7.16e-12	1.79e-14	-66.9	23.7494	-5.81	C9orf152	chromosome 9 open reading frame 152
1553132_a_at	7.17e-12	1.81e-14	-66.9	23.7412	-5.18	TC2N	tandem C2 domains, nuclear
206935_at	7.21e-12	1.83e-14	-66.8	23.7304	-4.92	PCDH8	protocadherin 8
203757_s_at	7.26e-12	1.86e-14	-66.7	23.7175	-5.31	CEACAM6	carcinoembryonic antigen related cell adhesion molecule 6
209602_s_at	7.3e-12	1.88e-14	-66.6	23.7068	-6.16	GATA3	GATA binding protein 3
221911_at	7.41e-12	1.93e-14	66.5	23.6866	7.1	ETV1	ETS variant 1
209590_at	7.41e-12	1.94e-14	-66.4	23.6809	-5.54	BMP7	bone morphogenetic protein 7
205696_s_at	7.47e-12	1.97e-14	-66.3	23.6679	-6.22	GFRA1	GDNF family receptor alpha 1
225945_at	7.65e-12	2.03e-14	66.1	23.6402	5.73	ZNF655	zinc finger protein 655
201860_s_at	7.71e-12	2.06e-14	66	23.6279	5.13	PLAT	plasminogen activator, tissue type
205498_at	7.71e-12	2.07e-14	-66	23.6219	-4.83	GHR	growth hormone receptor
212096_s_at	7.74e-12	2.1e-14	-65.9	23.6117	-5.32	MTUS1	microtubule associated tumor suppressor 1
221667_s_at	7.96e-12	2.17e-14	-65.7	23.5818	-4.91	HSPB8	heat shock protein family B (small) member 8
39248_at	8e-12	2.2e-14	-65.6	23.5705	-4.84	AQP3	aquaporin 3 (Gill blood group)
201427_s_at	8.2e-12	2.26e-14	-65.4	23.5436	-5.44	SEPP1	selenoprotein P, plasma, 1
203408_s_at	8.39e-12	2.35e-14	65.1	23.5115	4.84	SATB1	SATB homeobox 1
208025_s_at	8.39e-12	2.35e-14	65.1	23.5112	5.88	HMGA2	high mobility group AT-hook 2
226017_at	8.57e-12	2.42e-14	64.9	23.4833	4.77	CMTM7	CKLF like MARVEL transmembrane domain containing 7
211675_s_at	8.57e-12	2.44e-14	64.9	23.478	5.85	MDFIC	MyoD family inhibitor domain containing
208782_at	8.57e-12	2.46e-14	64.8	23.4689	5.59	FSTL1	follistatin like 1
209732_at	8.57e-12	2.47e-14	64.8	23.4664	5.47	CLEC2B	C-type lectin domain family 2 member B
225242_s_at	8.57e-12	2.48e-14	64.8	23.4632	5.31	CCDC80	coiled-coil domain containing 80
205768_s_at	8.6e-12	2.5e-14	-64.7	23.4554	-5.57	SLC27A2	solute carrier family 27 member 2
229292_at	8.63e-12	2.52e-14	-64.7	23.4467	-5.28	EPB41L5	erythrocyte membrane protein band 4.1 like 5
201506_at	8.92e-12	2.63e-14	64.4	23.4112	5.12	TGFBI	transforming growth factor beta induced
201839_s_at	8.92e-12	2.64e-14	-64.4	23.406	-5.81	EPCAM	epithelial cell adhesion molecule
240633_at	9.03e-12	2.69e-14	-64.2	23.3891	-4.64	DOK7	docking protein 7
208944_at	9.28e-12	2.78e-14	64	23.3593	7.03	TGFBR2	transforming growth factor beta receptor 2
202575_at	9.32e-12	2.81e-14	-63.9	23.3498	-4.82	CRABP2	cellular retinoic acid binding protein 2
219734_at	9.72e-12	2.96e-14	-63.6	23.3039	-5.05	SIDT1	SID1 transmembrane family member 1
206157_at	9.72e-12	2.97e-14	63.6	23.3006	7.43	PTX3	pentraxin 3
207076_s_at	9.72e-12	2.99e-14	-63.6	23.2957	-4.93	ASS1	argininosuccinate synthase 1
212509_s_at	9.72e-12	3.02e-14	63.5	23.2874	5.52	MXRA7	matrix remodeling associated 7
232176_at	9.72e-12	3.02e-14	-63.5	23.2856	-6.1	SLITRK6	SLIT and NTRK like family member 6
212667_at	9.76e-12	3.05e-14	63.4	23.2772	4.94	SPARC	secreted protein acidic and cysteine rich
230030_at	9.82e-12	3.09e-14	-63.3	23.2652	-5.82	HS6ST2	heparan sulfate 6-O-sulfotransferase 2
210652_s_at	9.82e-12	3.11e-14	-63.3	23.2612	-4.83	TTC39A	tetratricopeptide repeat domain 39A
209288_s_at	9.98e-12	3.18e-14	63.2	23.2408	4.97	CDC42EP3	CDC42 effector protein 3
225008_at	1.01e-11	3.22e-14	63.1	23.2291	5.13	ASPH	aspartate beta-hydroxylase
213050_at	1.02e-11	3.28e-14	-63	23.2116	-4.97	COBL	cordon-bleu WH2 repeat protein
209617_s_at	1.03e-11	3.35e-14	-62.8	23.1936	-5	CTNND2	catenin delta 2
228067_at	1.06e-11	3.45e-14	-62.6	23.1655	-5.45	KIAA1211L	KIAA1211 like
225113_at	1.06e-11	3.46e-14	62.6	23.1642	5.74	AGPS	alkylglycerone phosphate synthase
224909_s_at	1.06e-11	3.5e-14	-62.5	23.1527	-5.19	PREX1	phosphatidylinositol-3,4,5-trisphosphate dependent Rac exchange factor 1
203238_s_at	1.07e-11	3.56e-14	-62.4	23.1381	-4.79	NOTCH3	notch 3
40560_at	1.07e-11	3.56e-14	-62.4	23.1372	-4.85	TBX2	T-box 2
217979_at	1.07e-11	3.6e-14	-62.4	23.1294	-5.53	TSPAN13	tetraspanin 13
232202_at	1.08e-11	3.63e-14	-62.3	23.1202	-5.11	FAM83B	family with sequence similarity 83 member B
222668_at	1.08e-11	3.67e-14	-62.2	23.11	-5.46	KCTD15	potassium channel tetramerization domain containing 15
220227_at	1.08e-11	3.68e-14	62.2	23.1094	5.67	CDH4	cadherin 4
205009_at	1.08e-11	3.71e-14	-62.2	23.1021	-8.48	TFF1	trefoil factor 1
205258_at	1.08e-11	3.72e-14	-62.2	23.0976	-4.93	INHBB	inhibin beta B subunit
235141_at	1.1e-11	3.79e-14	-62	23.0819	-5.36	MARVELD2	MARVEL domain containing 2
209684_at	1.12e-11	3.89e-14	61.9	23.0584	4.56	RIN2	Ras and Rab interactor 2
204222_s_at	1.12e-11	3.93e-14	61.8	23.0481	4.78	GLIPR1	GLI pathogenesis related 1
222803_at	1.12e-11	3.95e-14	61.8	23.0451	4.84	PRTFDC1	phosphoribosyl transferase domain containing 1
219014_at	1.12e-11	3.96e-14	61.8	23.0416	5.31	PLAC8	placenta specific 8
1553972_a_at	1.14e-11	4.04e-14	-61.6	23.0233	-4.46	CBS	cystathionine-beta-synthase
222746_s_at	1.15e-11	4.1e-14	-61.6	23.0116	-5.34	BSPRY	B-box and SPRY domain containing
227662_at	1.16e-11	4.19e-14	-61.4	22.9913	-4.96	SYNPO2	synaptopodin 2
228058_at	1.16e-11	4.21e-14	-61.4	22.9867	-4.71	ZG16B	zymogen granule protein 16B
242138_at	1.16e-11	4.23e-14	-61.4	22.9833	-4.63	DLX1	distal-less homeobox 1
201288_at	1.16e-11	4.25e-14	61.3	22.9779	6.77	ARHGDIB	Rho GDP dissociation inhibitor beta
226185_at	1.16e-11	4.26e-14	-61.3	22.9761	-4.93	CDS1	CDP-diacylglycerol synthase 1
203819_s_at	1.16e-11	4.28e-14	61.3	22.9727	6.43	IGF2BP3	insulin like growth factor 2 mRNA binding protein 3
212151_at	1.16e-11	4.28e-14	-61.3	22.9712	-4.93	PBX1	PBX homeobox 1
215465_at	1.16e-11	4.3e-14	-61.3	22.9667	-4.68	ABCA12	ATP binding cassette subfamily A member 12
218503_at	1.16e-11	4.33e-14	-61.2	22.9618	-5.11	FOCAD	focadhesin
208978_at	1.16e-11	4.37e-14	-61.2	22.9538	-6.48	CRIP2	cysteine rich protein 2
37117_at	1.16e-11	4.39e-14	-61.1	22.949	-4.95	PRR5-ARHGAP8///ARHGAP8	PRR5-ARHGAP8 readthrough///Rho GTPase activating protein 8
227828_s_at	1.17e-11	4.42e-14	61.1	22.9426	4.71	EVA1A	eva-1 homolog A, regulator of programmed cell death
202489_s_at	1.17e-11	4.46e-14	-61	22.9337	-6.5	FXYD3	FXYD domain containing ion transport regulator 3
225524_at	1.17e-11	4.47e-14	61	22.9331	6.2	ANTXR2	anthrax toxin receptor 2
219410_at	1.19e-11	4.58e-14	60.9	22.9096	4.95	TMEM45A	transmembrane protein 45A
207392_x_at	1.21e-11	4.66e-14	-60.8	22.8934	-4.45	UGT2B15	UDP glucuronosyltransferase family 2 member B15
228083_at	1.21e-11	4.72e-14	60.7	22.8834	5.68	CACNA2D4	calcium voltage-gated channel auxiliary subunit alpha2delta 4
213603_s_at	1.21e-11	4.74e-14	60.7	22.8791	5.9	RAC2	ras-related C3 botulinum toxin substrate 2 (rho family, small GTP binding protein Rac2)
202859_x_at	1.21e-11	4.74e-14	60.7	22.8782	6.02	CXCL8	C-X-C motif chemokine ligand 8
204663_at	1.21e-11	4.78e-14	60.6	22.8708	4.47	ME3	malic enzyme 3
213429_at	1.21e-11	4.81e-14	60.6	22.8646	4.56	BICC1	BicC family RNA binding protein 1
203961_at	1.21e-11	4.82e-14	-60.6	22.8635	-4.81	NEBL	nebulette
224925_at	1.21e-11	4.83e-14	-60.5	22.8623	-4.51	PREX1	phosphatidylinositol-3,4,5-trisphosphate dependent Rac exchange factor 1
201566_x_at	1.21e-11	4.85e-14	-60.5	22.8582	-4.72	ID2	inhibitor of DNA binding 2, HLH protein
204952_at	1.23e-11	4.95e-14	-60.4	22.8391	-4.48	LYPD3	LY6/PLAUR domain containing 3
227952_at	1.24e-11	5.04e-14	-60.3	22.8231	-5	ZNF595	zinc finger protein 595
201163_s_at	1.24e-11	5.05e-14	60.3	22.8204	8.12	IGFBP7	insulin like growth factor binding protein 7
219529_at	1.25e-11	5.1e-14	-60.2	22.8113	-7.11	CLIC3	chloride intracellular channel 3
1552767_a_at	1.26e-11	5.15e-14	-60.1	22.8023	-5.63	HS6ST2	heparan sulfate 6-O-sulfotransferase 2
214954_at	1.28e-11	5.25e-14	60	22.7853	4.41	SUSD5	sushi domain containing 5
212012_at	1.3e-11	5.36e-14	-59.9	22.766	-4.41	PXDN	peroxidasin
209457_at	1.34e-11	5.56e-14	59.7	22.7335	5.12	DUSP5	dual specificity phosphatase 5
205302_at	1.34e-11	5.6e-14	59.6	22.7257	4.56	IGFBP1	insulin like growth factor binding protein 1
210517_s_at	1.36e-11	5.68e-14	59.6	22.7135	4.59	AKAP12	A-kinase anchoring protein 12
211657_at	1.36e-11	5.73e-14	-59.5	22.7056	-5.49	CEACAM6	carcinoembryonic antigen related cell adhesion molecule 6
204774_at	1.39e-11	5.9e-14	59.3	22.6787	5.4	EVI2A	ecotropic viral integration site 2A
1555673_at	1.39e-11	5.9e-14	59.3	22.6784	5.61	KRTAP2-3///KRTAP2-4	keratin associated protein 2-3///keratin associated protein 2-4
210674_s_at	1.39e-11	6e-14	-59.2	22.663	-4.7	PCDHA1///PCDHA2///PCDHA3///PCDHA4///PCDHA5///PCDHA6///PCDHA7///PCDHA8///PCDHA10///PCDHA11///PCDHA12///PCDHA13///PCDHAC1///PCDHAC2///PCDHA9	protocadherin alpha 1///protocadherin alpha 2///protocadherin alpha 3///protocadherin alpha 4///protocadherin alpha 5///protocadherin alpha 6///protocadherin alpha 7///protocadherin alpha 8///protocadherin alpha 10///protocadherin alpha 11///protocadherin alpha 12///protocadherin alpha 13///protocadherin alpha subfamily C, 1///protocadherin alpha subfamily C, 2///protocadherin alpha 9
210261_at	1.39e-11	6.01e-14	-59.2	22.6612	-5.26	KCNK2	potassium two pore domain channel subfamily K member 2
241789_at	1.39e-11	6.03e-14	59.2	22.6579	4.36	RBMS3	RNA binding motif single stranded interacting protein 3
232598_at	1.39e-11	6.08e-14	-59.1	22.6512	-5.13	NUP210L	nucleoporin 210 like
218888_s_at	1.39e-11	6.08e-14	-59.1	22.6511	-6.41	NETO2	neuropilin and tolloid like 2
205980_s_at	1.39e-11	6.09e-14	-59.1	22.6493	-4.42	PRR5-ARHGAP8///ARHGAP8	PRR5-ARHGAP8 readthrough///Rho GTPase activating protein 8
220122_at	1.39e-11	6.09e-14	59.1	22.6491	5.9	MCTP1	multiple C2 and transmembrane domain containing 1
205769_at	1.4e-11	6.17e-14	-59.1	22.6379	-5.29	SLC27A2	solute carrier family 27 member 2
236496_at	1.41e-11	6.23e-14	-59	22.628	-5.06	DEGS2	delta 4-desaturase, sphingolipid 2
212414_s_at	1.45e-11	6.41e-14	58.8	22.6021	5.18	GLYR1///SEPT6	glyoxylate reductase 1 homolog///septin 6
213620_s_at	1.45e-11	6.44e-14	58.8	22.5973	4.6	ICAM2	intercellular adhesion molecule 2
204044_at	1.45e-11	6.46e-14	-58.8	22.5954	-4.43	QPRT	quinolinate phosphoribosyltransferase
204614_at	1.47e-11	6.57e-14	58.7	22.5796	5.67	SERPINB2	serpin family B member 2
209774_x_at	1.49e-11	6.72e-14	58.5	22.5582	7.02	CXCL2	C-X-C motif chemokine ligand 2
225275_at	1.51e-11	6.83e-14	58.5	22.5436	5.43	EDIL3	EGF like repeats and discoidin domains 3
58916_at	1.51e-11	6.85e-14	58.4	22.5417	4.5	NDUFC2-KCTD14///KCTD14	NDUFC2-KCTD14 readthrough///potassium channel tetramerization domain containing 14
229215_at	1.51e-11	6.86e-14	-58.4	22.5396	-5.03	ASCL2	achaete-scute family bHLH transcription factor 2
226517_at	1.53e-11	7e-14	58.3	22.5208	8.32	BCAT1	branched chain amino acid transaminase 1
208789_at	1.53e-11	7.04e-14	58.3	22.5158	4.77	PTRF	polymerase I and transcript release factor
233059_at	1.53e-11	7.08e-14	-58.2	22.51	-4.8	KCNJ3	potassium voltage-gated channel subfamily J member 3
218792_s_at	1.53e-11	7.12e-14	-58.2	22.5051	-4.69	BSPRY	B-box and SPRY domain containing
209135_at	1.53e-11	7.14e-14	58.2	22.5028	5.26	ASPH	aspartate beta-hydroxylase
207302_at	1.53e-11	7.14e-14	-58.2	22.5026	-5.55	SGCG	sarcoglycan gamma
229534_at	1.53e-11	7.15e-14	-58.2	22.5009	-4.53	ACOT4	acyl-CoA thioesterase 4
212704_at	1.54e-11	7.24e-14	58.1	22.4893	4.73	ZCCHC11	zinc finger CCHC-type containing 11
204115_at	1.54e-11	7.29e-14	58.1	22.4838	6.25	GNG11	G protein subunit gamma 11
217989_at	1.58e-11	7.46e-14	57.9	22.4616	4.34	HSD17B11	hydroxysteroid 17-beta dehydrogenase 11
242909_at	1.58e-11	7.53e-14	-57.9	22.4532	-4.95
202628_s_at	1.58e-11	7.54e-14	57.9	22.4526	5.95	SERPINE1	serpin family E member 1
239148_at	1.59e-11	7.63e-14	-57.8	22.4408	-4.61	MARVELD3	MARVEL domain containing 3
1555812_a_at	1.6e-11	7.71e-14	57.7	22.4311	6.54	ARHGDIB	Rho GDP dissociation inhibitor beta
213139_at	1.63e-11	7.88e-14	57.6	22.4114	4.94	SNAI2	snail family transcriptional repressor 2
205110_s_at	1.67e-11	8.1e-14	57.5	22.3863	6.32	FGF13	fibroblast growth factor 13
202157_s_at	1.69e-11	8.21e-14	57.4	22.3728	5.57	CELF2	CUGBP, Elav-like family member 2
1553226_at	1.69e-11	8.27e-14	-57.3	22.3667	-6.16	LINC00052	long intergenic non-protein coding RNA 52
228108_at	1.69e-11	8.28e-14	-57.3	22.3656	-4.59	PPM1L	protein phosphatase, Mg2+/Mn2+ dependent 1L
238447_at	1.7e-11	8.38e-14	57.3	22.3547	6.04	RBMS3	RNA binding motif single stranded interacting protein 3
213245_at	1.71e-11	8.42e-14	-57.2	22.3499	-4.98	ADCY1	adenylate cyclase 1
201884_at	1.72e-11	8.51e-14	-57.2	22.3401	-4.45	CEACAM5	carcinoembryonic antigen related cell adhesion molecule 5
210319_x_at	1.72e-11	8.53e-14	-57.1	22.3374	-4.85	MSX2	msh homeobox 2
202998_s_at	1.72e-11	8.63e-14	57.1	22.3273	4.52	LOXL2	lysyl oxidase like 2
219118_at	1.72e-11	8.68e-14	-57	22.322	-4.43	FKBP11	FK506 binding protein 11
1553994_at	1.72e-11	8.69e-14	57	22.3207	6.06	NT5E	5'-nucleotidase ecto
235696_at	1.72e-11	8.7e-14	57	22.3197	4.38	LOC105379362	uncharacterized LOC105379362
227758_at	1.73e-11	8.79e-14	-57	22.3102	-4.79	RERG	RAS like estrogen regulated growth inhibitor
214321_at	1.74e-11	8.88e-14	56.9	22.3003	4.42	NOV	nephroblastoma overexpressed
230951_at	1.74e-11	8.9e-14	-56.9	22.298	-4.37	EPB41L5	erythrocyte membrane protein band 4.1 like 5
225664_at	1.74e-11	8.98e-14	56.9	22.2899	5.22	COL12A1	collagen type XII alpha 1 chain
219127_at	1.74e-11	9e-14	-56.8	22.2883	-4.54	PRR15L	proline rich 15 like
217966_s_at	1.74e-11	9.02e-14	56.8	22.2858	5.27	FAM129A	family with sequence similarity 129 member A
217889_s_at	1.74e-11	9.02e-14	56.8	22.2855	4.6	CYBRD1	cytochrome b reductase 1
203453_at	1.74e-11	9.03e-14	-56.8	22.2853	-4.58	SCNN1A	sodium channel epithelial 1 alpha subunit
211959_at	1.76e-11	9.2e-14	-56.7	22.2675	-4.57	IGFBP5	insulin like growth factor binding protein 5
201324_at	1.76e-11	9.24e-14	56.7	22.2637	7.79	EMP1	epithelial membrane protein 1
201650_at	1.76e-11	9.24e-14	-56.7	22.2635	-4.26	KRT19	keratin 19
204971_at	1.76e-11	9.29e-14	-56.7	22.258	-6.5	CSTA	cystatin A
229352_at	1.76e-11	9.31e-14	-56.6	22.2566	-4.28	SPESP1	sperm equatorial segment protein 1
225502_at	1.77e-11	9.37e-14	-56.6	22.2504	-4.51	DOCK8	dedicator of cytokinesis 8
218656_s_at	1.77e-11	9.45e-14	56.6	22.2429	4.63	LHFP	lipoma HMGIC fusion partner
55872_at	1.77e-11	9.48e-14	-56.5	22.2398	-4.12	ZNF512B	zinc finger protein 512B
219983_at	1.78e-11	9.57e-14	56.5	22.2309	4.14	HRASLS	HRAS like suppressor
221081_s_at	1.78e-11	9.61e-14	-56.5	22.2272	-5.27	DENND2D	DENN domain containing 2D
214452_at	1.78e-11	9.63e-14	56.5	22.2252	5.84	BCAT1	branched chain amino acid transaminase 1
208892_s_at	1.79e-11	9.7e-14	56.4	22.218	5.12	DUSP6	dual specificity phosphatase 6
212774_at	1.8e-11	9.8e-14	56.3	22.2085	4.44	ZBTB18	zinc finger and BTB domain containing 18
225688_s_at	1.83e-11	1e-13	56.2	22.1889	4.58	PHLDB2	pleckstrin homology like domain family B member 2
216250_s_at	1.83e-11	1e-13	56.2	22.1869	5.9	LPXN	leupaxin
218000_s_at	1.84e-11	1.01e-13	56.2	22.1801	4.71	PHLDA1	pleckstrin homology like domain family A member 1
238429_at	1.88e-11	1.04e-13	56	22.1561	6.24	TMEM71	transmembrane protein 71
205413_at	1.88e-11	1.04e-13	-56	22.1534	-4.66	MPPED2	metallophosphoesterase domain containing 2
223629_at	1.88e-11	1.04e-13	-56	22.1512	-4.06	PCDHB5	protocadherin beta 5
221582_at	1.89e-11	1.05e-13	-55.9	22.1426	-4.29	HIST3H2A	histone cluster 3, H2a
244745_at	1.9e-11	1.06e-13	-55.9	22.1374	-4.18	RERG	RAS like estrogen regulated growth inhibitor
221810_at	1.91e-11	1.07e-13	-55.8	22.1256	-4.07	RAB15	RAB15, member RAS oncogene family
218677_at	1.91e-11	1.08e-13	-55.8	22.1202	-5.48	S100A14	S100 calcium binding protein A14
217127_at	1.91e-11	1.08e-13	55.8	22.1181	4.36	CTH	cystathionine gamma-lyase
208056_s_at	1.91e-11	1.08e-13	-55.8	22.1162	-4.95	CBFA2T3	CBFA2/RUNX1 translocation partner 3
203875_at	1.91e-11	1.08e-13	55.8	22.116	4.96	SMARCA1	SWI/SNF related, matrix associated, actin dependent regulator of chromatin, subfamily a, member 1
204105_s_at	1.91e-11	1.08e-13	-55.8	22.1145	-5.36	NRCAM	neuronal cell adhesion molecule
218559_s_at	1.91e-11	1.09e-13	-55.7	22.1095	-4.08	MAFB	MAF bZIP transcription factor B
220318_at	1.92e-11	1.1e-13	-55.7	22.0992	-4.1	EPN3	epsin 3
1570351_at	1.95e-11	1.12e-13	55.6	22.0845	5.07	ADAMTS6	ADAM metallopeptidase with thrombospondin type 1 motif 6
1555355_a_at	1.97e-11	1.14e-13	55.5	22.0697	4.27	ETS1	ETS proto-oncogene 1, transcription factor
231798_at	1.98e-11	1.15e-13	55.5	22.0617	4.54	NOG	noggin
211340_s_at	1.98e-11	1.15e-13	55.4	22.0596	4.3	MIR6756///MCAM	microRNA 6756///melanoma cell adhesion molecule
232914_s_at	2.03e-11	1.18e-13	-55.3	22.0336	-5.6	SYTL2	synaptotagmin like 2
231067_s_at	2.03e-11	1.18e-13	55.3	22.0334	4.68	AKAP12	A-kinase anchoring protein 12
225792_at	2.03e-11	1.19e-13	-55.3	22.0273	-5.48	HOOK1	hook microtubule tethering protein 1
204359_at	2.04e-11	1.2e-13	55.2	22.022	4.92	LOC100506718///FLRT2	uncharacterized LOC100506718///fibronectin leucine rich transmembrane protein 2
203999_at	2.05e-11	1.21e-13	-55.2	22.0103	-5.16	SYT1	synaptotagmin 1
203780_at	2.05e-11	1.21e-13	-55.1	22.0077	-4.33	MPZL2	myelin protein zero like 2
206172_at	2.05e-11	1.22e-13	55.1	22.0046	8.2	IL13RA2	interleukin 13 receptor subunit alpha 2
212816_s_at	2.05e-11	1.22e-13	-55.1	22.0024	-4.37	CBS	cystathionine-beta-synthase
210764_s_at	2.05e-11	1.23e-13	55.1	21.9986	5.6	CYR61	cysteine rich angiogenic inducer 61
225045_at	2.05e-11	1.23e-13	55.1	21.9986	4.98	CCDC88A	coiled-coil domain containing 88A
208891_at	2.05e-11	1.23e-13	55.1	21.9979	4.86	DUSP6	dual specificity phosphatase 6
209101_at	2.05e-11	1.23e-13	55	21.9919	6.84	CTGF	connective tissue growth factor
238441_at	2.06e-11	1.24e-13	55	21.9868	4.74	PRKAA2	protein kinase AMP-activated catalytic subunit alpha 2
218330_s_at	2.06e-11	1.24e-13	55	21.9844	4.8	NAV2	neuron navigator 2
217996_at	2.06e-11	1.25e-13	55	21.9783	4.67	PHLDA1	pleckstrin homology like domain family A member 1
204554_at	2.06e-11	1.25e-13	-55	21.9783	-4.32	PPP1R3D	protein phosphatase 1 regulatory subunit 3D
211343_s_at	2.06e-11	1.26e-13	54.9	21.9748	7.06	COL13A1	collagen type XIII alpha 1 chain
205627_at	2.07e-11	1.27e-13	54.9	21.9674	3.95	CDA	cytidine deaminase
201850_at	2.07e-11	1.27e-13	54.9	21.965	4.62	CAPG	capping actin protein, gelsolin like
226192_at	2.09e-11	1.29e-13	-54.8	21.9541	-4.61	AR	androgen receptor
224646_x_at	2.09e-11	1.29e-13	-54.8	21.9503	-5.19	MIR675///H19	microRNA 675///H19, imprinted maternally expressed transcript (non-protein coding)
205579_at	2.09e-11	1.29e-13	54.8	21.9487	4.49	HRH1	histamine receptor H1
234970_at	2.12e-11	1.32e-13	-54.7	21.9315	-4.33	TC2N	tandem C2 domains, nuclear
229641_at	2.17e-11	1.35e-13	54.5	21.9073	3.93	CCBE1	collagen and calcium binding EGF domains 1
244370_at	2.2e-11	1.38e-13	-54.4	21.8883	-4.17	KIAA2022	KIAA2022
205100_at	2.2e-11	1.38e-13	54.4	21.8862	4.92	GFPT2	glutamine-fructose-6-phosphate transaminase 2
205479_s_at	2.2e-11	1.38e-13	54.4	21.8858	7	PLAU	plasminogen activator, urokinase
231853_at	2.2e-11	1.39e-13	-54.4	21.8814	-4.63	TUBD1	tubulin delta 1
203065_s_at	2.23e-11	1.41e-13	54.3	21.8662	5.24	CAV1	caveolin 1
205350_at	2.23e-11	1.42e-13	-54.3	21.8615	-3.98	CRABP1	cellular retinoic acid binding protein 1
211964_at	2.23e-11	1.43e-13	54.2	21.8569	5.51	COL4A2	collagen type IV alpha 2 chain
218312_s_at	2.23e-11	1.43e-13	54.2	21.8568	4.88	ZSCAN18	zinc finger and SCAN domain containing 18
212327_at	2.23e-11	1.43e-13	54.2	21.8537	4.64	LIMCH1	LIM and calponin homology domains 1
207522_s_at	2.23e-11	1.43e-13	-54.2	21.8525	-5.89	ATP2A3	ATPase sarcoplasmic/endoplasmic reticulum Ca2+ transporting 3
235557_at	2.26e-11	1.45e-13	54.1	21.8394	6.1	GPAT2	glycerol-3-phosphate acyltransferase 2, mitochondrial
204379_s_at	2.27e-11	1.46e-13	-54.1	21.8314	-3.88	FGFR3	fibroblast growth factor receptor 3
204646_at	2.27e-11	1.47e-13	54.1	21.8285	6.76	DPYD	dihydropyrimidine dehydrogenase
213417_at	2.28e-11	1.48e-13	-54.1	21.8227	-4.37	TBX2	T-box 2
217999_s_at	2.28e-11	1.48e-13	54	21.8193	5.12	PHLDA1	pleckstrin homology like domain family A member 1
232113_at	2.28e-11	1.49e-13	54	21.8169	5.41
226142_at	2.32e-11	1.52e-13	53.9	21.7955	4.17	GLIPR1	GLI pathogenesis related 1
228531_at	2.37e-11	1.56e-13	53.8	21.7722	4.03	SAMD9	sterile alpha motif domain containing 9
201510_at	2.37e-11	1.56e-13	-53.8	21.7712	-4.09	ELF3	E74 like ETS transcription factor 3
219825_at	2.39e-11	1.58e-13	53.7	21.7607	4.45	CYP26B1	cytochrome P450 family 26 subfamily B member 1
227474_at	2.39e-11	1.58e-13	-53.7	21.7583	-4.29	PAX8-AS1	PAX8 antisense RNA 1
227443_at	2.4e-11	1.59e-13	-53.6	21.7512	-4.25	LURAP1L	leucine rich adaptor protein 1 like
204942_s_at	2.42e-11	1.61e-13	-53.6	21.7421	-5.69	ALDH3B2	aldehyde dehydrogenase 3 family member B2
221958_s_at	2.44e-11	1.63e-13	53.5	21.7296	5.96	WLS	wntless Wnt ligand secretion mediator
60474_at	2.44e-11	1.63e-13	53.5	21.7276	4.4	FERMT1	fermitin family member 1
219885_at	2.45e-11	1.64e-13	53.5	21.7231	5.05	SLFN12	schlafen family member 12
204623_at	2.46e-11	1.66e-13	-53.4	21.7144	-4.49	TFF3	trefoil factor 3
214453_s_at	2.46e-11	1.66e-13	53.4	21.7124	4.96	IFI44	interferon induced protein 44
205694_at	2.47e-11	1.67e-13	-53.4	21.7056	-4.26	TYRP1	tyrosinase related protein 1
209618_at	2.47e-11	1.68e-13	-53.4	21.7017	-4.68	CTNND2	catenin delta 2
218451_at	2.47e-11	1.68e-13	53.3	21.6995	5.56	CDCP1	CUB domain containing protein 1
218694_at	2.49e-11	1.7e-13	53.3	21.6905	4.76	ARMCX1	armadillo repeat containing, X-linked 1
59697_at	2.51e-11	1.72e-13	-53.2	21.6799	-4.11	RAB15	RAB15, member RAS oncogene family
210085_s_at	2.52e-11	1.73e-13	-53.2	21.6757	-5.01	ANXA9	annexin A9
213238_at	2.54e-11	1.75e-13	53.1	21.6642	4.09	ATP10D	ATPase phospholipid transporting 10D (putative)
242931_at	2.54e-11	1.75e-13	53.1	21.6629	4.74
223895_s_at	2.57e-11	1.78e-13	-53.1	21.6484	-5.2	EPN3	epsin 3
204880_at	2.58e-11	1.79e-13	-53	21.6412	-4.83	MGMT	O-6-methylguanine-DNA methyltransferase
219109_at	2.58e-11	1.79e-13	53	21.6404	5.09	SPAG16	sperm associated antigen 16
219984_s_at	2.59e-11	1.81e-13	53	21.633	4.02	HRASLS	HRAS like suppressor
202073_at	2.6e-11	1.82e-13	52.9	21.6263	3.92	OPTN	optineurin
202270_at	2.61e-11	1.83e-13	52.9	21.6211	4.23	GBP1	guanylate binding protein 1
203729_at	2.63e-11	1.85e-13	52.8	21.6115	4.94	EMP3	epithelial membrane protein 3
206866_at	2.63e-11	1.85e-13	52.8	21.6081	4.6	CDH4	cadherin 4
227769_at	2.64e-11	1.86e-13	-52.8	21.6027	-5.94	GPR27	G protein-coupled receptor 27
213844_at	2.67e-11	1.9e-13	-52.7	21.5839	-4.08	HOXA5	homeobox A5
227892_at	2.67e-11	1.9e-13	52.7	21.5837	5.51	PRKAA2	protein kinase AMP-activated catalytic subunit alpha 2
205862_at	2.67e-11	1.9e-13	-52.7	21.5834	-4.98	GREB1	growth regulation by estrogen in breast cancer 1
202525_at	2.68e-11	1.91e-13	-52.7	21.5802	-4.58	PRSS8	protease, serine 8
212686_at	2.68e-11	1.91e-13	-52.7	21.5775	-4.5	PPM1H	protein phosphatase, Mg2+/Mn2+ dependent 1H
225108_at	2.68e-11	1.92e-13	52.6	21.5734	4.83	AGPS	alkylglycerone phosphate synthase
218807_at	2.72e-11	1.96e-13	-52.5	21.5564	-4.19	VAV3	vav guanine nucleotide exchange factor 3
203695_s_at	2.77e-11	1.99e-13	52.4	21.5382	6.36	DFNA5	DFNA5, deafness associated tumor suppressor
240512_x_at	2.79e-11	2.01e-13	52.4	21.5293	3.86	KCTD4	potassium channel tetramerization domain containing 4
226068_at	2.79e-11	2.02e-13	-52.4	21.5256	-4.06	SYK	spleen associated tyrosine kinase
209885_at	2.82e-11	2.05e-13	-52.3	21.5125	-3.84	RHOD	ras homolog family member D
222592_s_at	2.82e-11	2.05e-13	52.3	21.5123	4.91	ACSL5	acyl-CoA synthetase long-chain family member 5
226084_at	2.85e-11	2.08e-13	52.2	21.499	4.39	MAP1B	microtubule associated protein 1B
227641_at	2.9e-11	2.12e-13	-52.1	21.4787	-4.33	FBXL16	F-box and leucine rich repeat protein 16
212338_at	2.95e-11	2.16e-13	-52	21.461	-4.34	MYO1D	myosin ID
209917_s_at	2.95e-11	2.17e-13	-52	21.4591	-3.98	TP53TG1	TP53 target 1 (non-protein coding)
210665_at	2.96e-11	2.18e-13	52	21.4518	5.64	TFPI	tissue factor pathway inhibitor
233364_s_at	2.96e-11	2.19e-13	51.9	21.4495	4.65
1552658_a_at	2.98e-11	2.21e-13	51.9	21.4411	5.07	NAV3	neuron navigator 3
209626_s_at	3e-11	2.22e-13	51.9	21.4343	4.25	OSBPL3	oxysterol binding protein like 3
213036_x_at	3.02e-11	2.25e-13	-51.8	21.4233	-4.96	ATP2A3	ATPase sarcoplasmic/endoplasmic reticulum Ca2+ transporting 3
211924_s_at	3.02e-11	2.25e-13	51.8	21.4229	4.06	PLAUR	plasminogen activator, urokinase receptor
206953_s_at	3.13e-11	2.34e-13	51.6	21.3846	4.55	ADGRL2	adhesion G protein-coupled receptor L2
219756_s_at	3.13e-11	2.35e-13	-51.6	21.3813	-3.9	POF1B	premature ovarian failure, 1B
227486_at	3.2e-11	2.41e-13	51.4	21.358	5.36	NT5E	5'-nucleotidase ecto
233555_s_at	3.2e-11	2.41e-13	-51.4	21.3575	-6.2	SULF2	sulfatase 2
242354_at	3.22e-11	2.43e-13	-51.4	21.3499	-4.06
225685_at	3.22e-11	2.44e-13	51.4	21.3474	4.6	CDC42EP3	CDC42 effector protein 3
238462_at	3.23e-11	2.45e-13	51.3	21.3411	4.55	UBASH3B	ubiquitin associated and SH3 domain containing B
1557938_s_at	3.26e-11	2.48e-13	51.3	21.331	3.93	PTRF	polymerase I and transcript release factor
218573_at	3.26e-11	2.49e-13	-51.3	21.3278	-3.9	MAGEH1	MAGE family member H1
202910_s_at	3.29e-11	2.52e-13	51.2	21.3155	4.09	ADGRE5	adhesion G protein-coupled receptor E5
207430_s_at	3.31e-11	2.53e-13	-51.2	21.3094	-4.14	MSMB	microseminoprotein beta
205830_at	3.37e-11	2.59e-13	51.1	21.2884	4.05	CLGN	calmegin
204011_at	3.37e-11	2.6e-13	51	21.2848	3.73	SPRY2	sprouty RTK signaling antagonist 2
1569114_at	3.37e-11	2.6e-13	-51	21.2839	-4.91
229385_s_at	3.4e-11	2.63e-13	-51	21.2726	-3.8	TINCR	tissue differentiation-inducing non-protein coding RNA
1552496_a_at	3.42e-11	2.65e-13	-50.9	21.2663	-4.12	COBL	cordon-bleu WH2 repeat protein
219926_at	3.44e-11	2.67e-13	50.9	21.2576	4.31	POPDC3	popeye domain containing 3
225619_at	3.45e-11	2.69e-13	50.9	21.2522	3.99	SLAIN1	SLAIN motif family member 1
219545_at	3.47e-11	2.71e-13	50.8	21.2451	3.97	NDUFC2-KCTD14///KCTD14	NDUFC2-KCTD14 readthrough///potassium channel tetramerization domain containing 14
204351_at	3.47e-11	2.72e-13	-50.8	21.2413	-3.8	S100P	S100 calcium binding protein P
226403_at	3.47e-11	2.73e-13	-50.8	21.2378	-4.41	TMC4	transmembrane channel like 4
224990_at	3.47e-11	2.73e-13	-50.8	21.2376	-4.01	SMIM14	small integral membrane protein 14
203304_at	3.5e-11	2.76e-13	-50.7	21.2272	-5.2	BAMBI	BMP and activin membrane bound inhibitor
202718_at	3.5e-11	2.77e-13	-50.7	21.2248	-4.57	IGFBP2	insulin like growth factor binding protein 2
200665_s_at	3.53e-11	2.8e-13	50.7	21.2152	6.86	SPARC	secreted protein acidic and cysteine rich
1556328_at	3.62e-11	2.87e-13	-50.5	21.1887	-4.18	PCDH10	protocadherin 10
205759_s_at	3.64e-11	2.89e-13	-50.5	21.1821	-4.12	SULT2B1	sulfotransferase family 2B member 1
229223_at	3.71e-11	2.96e-13	-50.4	21.1594	-3.94
222925_at	3.76e-11	3e-13	-50.3	21.1456	-3.96	DCDC2	doublecortin domain containing 2
213568_at	3.8e-11	3.04e-13	-50.2	21.1332	-3.85	OSR2	odd-skipped related transciption factor 2
219090_at	3.8e-11	3.05e-13	-50.2	21.1301	-3.62	SLC24A3	solute carrier family 24 member 3
223302_s_at	3.82e-11	3.07e-13	50.2	21.1249	3.9	ZNF655	zinc finger protein 655
227285_at	3.82e-11	3.09e-13	-50.2	21.1184	-3.65	CIART	circadian associated repressor of transcription
210845_s_at	3.82e-11	3.09e-13	50.2	21.1182	4.12	PLAUR	plasminogen activator, urokinase receptor
204798_at	3.82e-11	3.09e-13	-50.1	21.1173	-4.38	MYB	MYB proto-oncogene, transcription factor
222453_at	3.83e-11	3.11e-13	50.1	21.1112	5.04	CYBRD1	cytochrome b reductase 1
1556329_a_at	3.86e-11	3.14e-13	-50.1	21.1032	-5.39	PCDH10	protocadherin 10
218824_at	3.93e-11	3.21e-13	50	21.0833	4.32	PNMAL1	paraneoplastic Ma antigen family like 1
227163_at	3.93e-11	3.21e-13	-50	21.0814	-3.77	GSTO2	glutathione S-transferase omega 2
231926_at	3.98e-11	3.26e-13	-49.9	21.0662	-3.88	EPS15L1	epidermal growth factor receptor pathway substrate 15 like 1
209627_s_at	4.01e-11	3.29e-13	49.8	21.0578	4.75	OSBPL3	oxysterol binding protein like 3
1552690_a_at	4.04e-11	3.33e-13	49.8	21.0472	3.92	CACNA2D4	calcium voltage-gated channel auxiliary subunit alpha2delta 4
204032_at	4.19e-11	3.46e-13	49.6	21.0101	3.74	BCAR3	breast cancer anti-estrogen resistance 3
209676_at	4.22e-11	3.49e-13	49.5	21.0011	4.95	TFPI	tissue factor pathway inhibitor
205280_at	4.27e-11	3.53e-13	49.5	20.989	4.19	GLRB	glycine receptor beta
229441_at	4.28e-11	3.55e-13	49.5	20.9842	4.58	PRSS23	protease, serine 23
225516_at	4.29e-11	3.57e-13	-49.4	20.9797	-4.63	SLC7A2	solute carrier family 7 member 2
242053_at	4.31e-11	3.59e-13	-49.4	20.9727	-4.27
205555_s_at	4.31e-11	3.6e-13	-49.4	20.9706	-4.5	MSX2	msh homeobox 2
202936_s_at	4.34e-11	3.63e-13	49.3	20.9623	4.91	SOX9	SRY-box 9
220581_at	4.34e-11	3.64e-13	-49.3	20.9604	-4.04	CCDC170	coiled-coil domain containing 170
212013_at	4.36e-11	3.66e-13	-49.3	20.9539	-3.71	PXDN	peroxidasin
222744_s_at	4.44e-11	3.75e-13	-49.2	20.9327	-4.08	TMLHE	trimethyllysine hydroxylase, epsilon
228038_at	4.45e-11	3.76e-13	-49.2	20.928	-5.11	SOX2	SRY-box 2
231778_at	4.47e-11	3.79e-13	-49.1	20.9225	-4.05	DLX3	distal-less homeobox 3
230112_at	4.47e-11	3.79e-13	49.1	20.9201	4.32	MARCH4	membrane associated ring-CH-type finger 4
205542_at	4.5e-11	3.82e-13	49.1	20.9127	6.53	STEAP1	six transmembrane epithelial antigen of the prostate 1
226974_at	4.53e-11	3.86e-13	49	20.9029	5.34	NEDD4L	neural precursor cell expressed, developmentally down-regulated 4-like, E3 ubiquitin protein ligase
231048_at	4.54e-11	3.88e-13	49	20.8982	4.78
214751_at	4.54e-11	3.88e-13	49	20.8976	4.18	ZNF468	zinc finger protein 468
215043_s_at	4.59e-11	3.94e-13	-48.9	20.8835	-3.78	GUSBP3///SMA5///SMA4	glucuronidase, beta pseudogene 3///glucuronidase beta pseudogene///glucuronidase beta pseudogene
227530_at	4.59e-11	3.95e-13	48.9	20.8825	4.39	AKAP12	A-kinase anchoring protein 12
224516_s_at	4.59e-11	3.95e-13	-48.9	20.8809	-4.19	CXXC5	CXXC finger protein 5
215034_s_at	4.67e-11	4.03e-13	48.8	20.8613	7.01	TM4SF1	transmembrane 4 L six family member 1
203256_at	4.68e-11	4.05e-13	-48.8	20.8575	-5.04	CDH3	cadherin 3
221326_s_at	4.7e-11	4.07e-13	-48.8	20.8521	-3.8	TUBD1	tubulin delta 1
235740_at	4.7e-11	4.09e-13	48.7	20.8479	5.65	MCTP1	multiple C2 and transmembrane domain containing 1
220205_at	4.7e-11	4.09e-13	-48.7	20.8473	-3.65	TPTE	transmembrane phosphatase with tensin homology
218526_s_at	4.75e-11	4.14e-13	48.7	20.8349	4.52	RANGRF	RAN guanine nucleotide release factor
206170_at	4.75e-11	4.15e-13	48.7	20.8325	4.56	ADRB2	adrenoceptor beta 2
225895_at	4.86e-11	4.26e-13	-48.5	20.8073	-4.88	SYNPO2	synaptopodin 2
228176_at	4.86e-11	4.27e-13	-48.5	20.8058	-4.64	S1PR3	sphingosine-1-phosphate receptor 3
206354_at	4.88e-11	4.3e-13	48.5	20.7996	4.88	SLCO1B3	solute carrier organic anion transporter family member 1B3
224823_at	4.88e-11	4.3e-13	48.5	20.7993	4.68	MYLK	myosin light chain kinase
203499_at	4.93e-11	4.35e-13	48.4	20.7874	3.85	EPHA2	EPH receptor A2
225841_at	4.95e-11	4.38e-13	-48.4	20.7808	-5.5	HENMT1	HEN1 methyltransferase homolog 1
210241_s_at	4.95e-11	4.39e-13	-48.4	20.7784	-3.8	TP53TG1	TP53 target 1 (non-protein coding)
226534_at	4.96e-11	4.41e-13	-48.4	20.7746	-4.64	KITLG	KIT ligand
205349_at	4.99e-11	4.45e-13	48.3	20.7663	4.14	GNA15	G protein subunit alpha 15
230869_at	5.01e-11	4.47e-13	48.3	20.7611	3.93	FAM155A	family with sequence similarity 155 member A
1553180_at	5.03e-11	4.5e-13	-48.3	20.7551	-3.93	ADAMTS19	ADAM metallopeptidase with thrombospondin type 1 motif 19
217975_at	5.03e-11	4.5e-13	48.3	20.7539	7.37	TCEAL9	transcription elongation factor A like 9
226187_at	5.04e-11	4.53e-13	-48.2	20.7477	-3.94	CDS1	CDP-diacylglycerol synthase 1
243818_at	5.04e-11	4.54e-13	48.2	20.7466	3.83	SFTA1P	surfactant associated 1, pseudogene
201720_s_at	5.04e-11	4.55e-13	48.2	20.7447	4.72	LAPTM5	lysosomal protein transmembrane 5
227623_at	5.04e-11	4.55e-13	48.2	20.743	3.7	CACNA2D1	calcium voltage-gated channel auxiliary subunit alpha2delta 1
203504_s_at	5.04e-11	4.56e-13	48.2	20.7415	3.89	ABCA1	ATP binding cassette subfamily A member 1
218211_s_at	5.04e-11	4.57e-13	-48.2	20.7392	-3.92	MLPH	melanophilin
229691_at	5.08e-11	4.61e-13	-48.2	20.7304	-4.43	ZBTB42	zinc finger and BTB domain containing 42
228721_at	5.08e-11	4.63e-13	48.1	20.7271	5.16	KRBOX1	KRAB box domain containing 1
206584_at	5.12e-11	4.68e-13	48.1	20.7173	5.66	LY96	lymphocyte antigen 96
202967_at	5.15e-11	4.71e-13	48.1	20.711	3.83	GSTA4	glutathione S-transferase alpha 4
228885_at	5.2e-11	4.77e-13	48	20.6987	4.06	MAMDC2	MAM domain containing 2
203939_at	5.2e-11	4.77e-13	48	20.698	6.7	NT5E	5'-nucleotidase ecto
201162_at	5.21e-11	4.79e-13	48	20.694	5.93	IGFBP7	insulin like growth factor binding protein 7
231923_at	5.21e-11	4.81e-13	-48	20.6904	-4.01	TMEM150C	transmembrane protein 150C
203815_at	5.21e-11	4.82e-13	-47.9	20.6886	-4.02	GSTT1	glutathione S-transferase theta 1
210827_s_at	5.23e-11	4.84e-13	-47.9	20.6829	-4.03	ELF3	E74 like ETS transcription factor 3
201289_at	5.3e-11	4.91e-13	47.8	20.6689	4.31	CYR61	cysteine rich angiogenic inducer 61
229842_at	5.36e-11	4.98e-13	-47.8	20.6557	-3.93	ELF3	E74 like ETS transcription factor 3
230763_at	5.39e-11	5.02e-13	-47.7	20.6487	-4.16	SPATA17	spermatogenesis associated 17
208683_at	5.41e-11	5.04e-13	47.7	20.6439	3.52	CAPN2	calpain 2
204112_s_at	5.41e-11	5.05e-13	47.7	20.6417	4.54	HNMT	histamine N-methyltransferase
225272_at	5.46e-11	5.12e-13	47.7	20.6293	4.78	SAT2	spermidine/spermine N1-acetyltransferase family member 2
237411_at	5.46e-11	5.12e-13	47.6	20.6291	7.68	ADAMTS6	ADAM metallopeptidase with thrombospondin type 1 motif 6
211470_s_at	5.47e-11	5.14e-13	47.6	20.6245	3.67	SULT1C2	sulfotransferase family 1C member 2
211576_s_at	5.52e-11	5.2e-13	-47.6	20.6133	-4.14	SLC19A1	solute carrier family 19 member 1
213506_at	5.58e-11	5.27e-13	47.5	20.6012	3.65	F2RL1	F2R like trypsin receptor 1
214822_at	5.64e-11	5.34e-13	-47.4	20.5885	-3.63	BRINP2	BMP/retinoic acid inducible neural specific 2
209218_at	5.67e-11	5.37e-13	-47.4	20.5826	-3.36	SQLE	squalene epoxidase
230925_at	5.69e-11	5.4e-13	47.4	20.5762	3.62	APBB1IP	amyloid beta precursor protein binding family B member 1 interacting protein
231120_x_at	5.76e-11	5.48e-13	-47.3	20.5634	-3.71	PKIB	protein kinase (cAMP-dependent, catalytic) inhibitor beta
207469_s_at	5.76e-11	5.49e-13	-47.3	20.5605	-4.14	PIR	pirin
203874_s_at	5.76e-11	5.5e-13	47.3	20.5595	5.69	SMARCA1	SWI/SNF related, matrix associated, actin dependent regulator of chromatin, subfamily a, member 1
202826_at	5.77e-11	5.52e-13	-47.3	20.5561	-5.27	SPINT1	serine peptidase inhibitor, Kunitz type 1
212174_at	5.82e-11	5.58e-13	47.2	20.5455	3.89	AK2	adenylate kinase 2
244623_at	5.82e-11	5.59e-13	47.2	20.5439	4.64	KCNQ5	potassium voltage-gated channel subfamily Q member 5
203485_at	5.84e-11	5.62e-13	47.2	20.5383	3.53	RTN1	reticulon 1
218718_at	5.85e-11	5.63e-13	47.2	20.5354	8.06	PDGFC	platelet derived growth factor C
210389_x_at	5.85e-11	5.65e-13	-47.2	20.533	-3.85	TUBD1	tubulin delta 1
227803_at	5.88e-11	5.69e-13	-47.1	20.5263	-3.92	ENPP5	ectonucleotide pyrophosphatase/phosphodiesterase 5 (putative)
218935_at	5.9e-11	5.72e-13	-47.1	20.5204	-3.69	EHD3	EH domain containing 3
202274_at	5.93e-11	5.75e-13	-47.1	20.5148	-3.35	ACTG2	actin, gamma 2, smooth muscle, enteric
226325_at	5.96e-11	5.8e-13	-47.1	20.5075	-4.23	ADSSL1	adenylosuccinate synthase like 1
203348_s_at	5.97e-11	5.82e-13	47	20.5034	3.68	ETV5	ETS variant 5
1557049_at	5.98e-11	5.84e-13	47	20.5	3.61	BTBD19	BTB domain containing 19
235728_at	6.03e-11	5.9e-13	-47	20.4911	-3.9	ZFP3	ZFP3 zinc finger protein
215471_s_at	6.07e-11	5.96e-13	-46.9	20.4804	-3.79	MAP7	microtubule associated protein 7
1552309_a_at	6.07e-11	5.96e-13	46.9	20.4797	3.46	NEXN	nexilin F-actin binding protein
212233_at	6.08e-11	5.98e-13	46.9	20.4773	3.81	MAP1B	microtubule associated protein 1B
208893_s_at	6.11e-11	6.03e-13	46.9	20.4698	4.41	DUSP6	dual specificity phosphatase 6
202760_s_at	6.14e-11	6.06e-13	46.8	20.4636	7.91	PALM2-AKAP2///AKAP2	PALM2-AKAP2 readthrough///A-kinase anchoring protein 2
202889_x_at	6.14e-11	6.07e-13	-46.8	20.4622	-3.7	MAP7	microtubule associated protein 7
228365_at	6.19e-11	6.15e-13	46.8	20.4505	4.83	CPNE8	copine 8
212950_at	6.19e-11	6.15e-13	46.8	20.45	4.84	ADGRF5	adhesion G protein-coupled receptor F5
227210_at	6.21e-11	6.18e-13	-46.7	20.4453	-4.04	SFMBT2	Scm-like with four mbt domains 2
211980_at	6.23e-11	6.21e-13	46.7	20.4397	4.09	COL4A1	collagen type IV alpha 1 chain
214077_x_at	6.25e-11	6.24e-13	-46.7	20.435	-3.68	MEIS3P1	Meis homeobox 3 pseudogene 1
215294_s_at	6.3e-11	6.3e-13	46.7	20.4259	5.34	SMARCA1	SWI/SNF related, matrix associated, actin dependent regulator of chromatin, subfamily a, member 1
230183_at	6.34e-11	6.35e-13	46.6	20.4183	4.28	EXT1	exostosin glycosyltransferase 1
203962_s_at	6.37e-11	6.4e-13	-46.6	20.4107	-4.96	NEBL	nebulette
201280_s_at	6.46e-11	6.5e-13	46.5	20.3956	4.2	LOC101926921///DAB2	uncharacterized LOC101926921///DAB2, clathrin adaptor protein
210145_at	6.46e-11	6.51e-13	46.5	20.3939	3.64	PLA2G4A	phospholipase A2 group IVA
205613_at	6.66e-11	6.72e-13	-46.4	20.3627	-3.31	SYT17	synaptotagmin 17
202350_s_at	6.72e-11	6.81e-13	-46.3	20.3502	-3.59	LOC100506558///MATN2	uncharacterized LOC100506558///matrilin 2
204484_at	6.72e-11	6.81e-13	-46.3	20.3498	-3.54	PIK3C2B	phosphatidylinositol-4-phosphate 3-kinase catalytic subunit type 2 beta
238587_at	6.72e-11	6.82e-13	46.3	20.3486	3.92	UBASH3B	ubiquitin associated and SH3 domain containing B
230323_s_at	6.72e-11	6.83e-13	-46.3	20.3463	-3.6	TMEM45B	transmembrane protein 45B
210749_x_at	6.74e-11	6.87e-13	-46.2	20.3415	-3.49	MIR4640///DDR1	microRNA 4640///discoidin domain receptor tyrosine kinase 1
220488_s_at	6.8e-11	6.94e-13	-46.2	20.3312	-3.79	BCAS3	BCAS3, microtubule associated cell migration factor
200965_s_at	6.8e-11	6.96e-13	46.2	20.3288	4.15	ABLIM1	actin binding LIM protein 1
218981_at	6.82e-11	6.98e-13	46.2	20.3252	4.7	SDHAF3	succinate dehydrogenase complex assembly factor 3
206115_at	6.85e-11	7.03e-13	-46.1	20.319	-4.55	EGR3	early growth response 3
227461_at	6.95e-11	7.15e-13	-46.1	20.3025	-3.79	STON2	stonin 2
239579_at	6.98e-11	7.19e-13	46	20.2967	4.65	EPHX4	epoxide hydrolase 4
1554018_at	6.98e-11	7.2e-13	-46	20.2958	-3.69	GPNMB	glycoprotein nmb
225061_at	7e-11	7.23e-13	-46	20.2906	-3.99	DNAJA4	DnaJ heat shock protein family (Hsp40) member A4
205879_x_at	7.03e-11	7.28e-13	-46	20.2843	-4.07	RET	ret proto-oncogene
217028_at	7.05e-11	7.31e-13	-46	20.2798	-3.55	CXCR4	C-X-C motif chemokine receptor 4
228762_at	7.23e-11	7.52e-13	-45.8	20.2525	-3.44	LFNG	LFNG O-fucosylpeptide 3-beta-N-acetylglucosaminyltransferase
229450_at	7.23e-11	7.53e-13	45.8	20.2516	5.03	IFIT3	interferon induced protein with tetratricopeptide repeats 3
204604_at	7.23e-11	7.54e-13	45.8	20.2498	3.97	CDK14	cyclin dependent kinase 14
205743_at	7.26e-11	7.58e-13	45.8	20.2441	3.64	STAC	SH3 and cysteine rich domain
201616_s_at	7.27e-11	7.6e-13	45.8	20.2416	4.92	CALD1	caldesmon 1
210006_at	7.31e-11	7.66e-13	45.7	20.2347	3.64	ABHD14A///ACY1	abhydrolase domain containing 14A///aminoacylase 1
214390_s_at	7.33e-11	7.7e-13	45.7	20.2296	3.94	BCAT1	branched chain amino acid transaminase 1
221648_s_at	7.33e-11	7.71e-13	-45.7	20.2278	-4.11	AGMAT	agmatinase
201525_at	7.33e-11	7.73e-13	-45.7	20.2259	-5.47	APOD	apolipoprotein D
225391_at	7.33e-11	7.74e-13	-45.7	20.2241	-3.26	LOC93622	Morf4 family associated protein 1 like 1 pseudogene
226425_at	7.35e-11	7.77e-13	45.7	20.2198	4.99	CLIP4	CAP-Gly domain containing linker protein family member 4
228063_s_at	7.42e-11	7.85e-13	45.6	20.2097	4.06	NAP1L5	nucleosome assembly protein 1 like 5
231579_s_at	7.44e-11	7.89e-13	45.6	20.2049	3.31	TIMP2	TIMP metallopeptidase inhibitor 2
221585_at	7.44e-11	7.91e-13	-45.6	20.2026	-4.43	CACNG4	calcium voltage-gated channel auxiliary subunit gamma 4
220225_at	7.45e-11	7.95e-13	-45.6	20.1979	-3.7	IRX4	iroquois homeobox 4
225046_at	7.45e-11	7.95e-13	45.6	20.1978	3.39	LOC102724951///LOC389831	uncharacterized LOC102724951///uncharacterized LOC389831
236918_s_at	7.5e-11	8.01e-13	45.5	20.1898	4.84	LRRC34	leucine rich repeat containing 34
226218_at	7.55e-11	8.08e-13	45.5	20.1813	3.53	IL7R	interleukin 7 receptor
202974_at	7.59e-11	8.15e-13	45.5	20.1734	3.7	MPP1	membrane palmitoylated protein 1
226248_s_at	7.59e-11	8.15e-13	-45.5	20.1729	-3.58	KIAA1324	KIAA1324
209318_x_at	7.59e-11	8.16e-13	-45.4	20.1714	-4.25	PLAGL1	PLAG1 like zinc finger 1
221024_s_at	7.6e-11	8.19e-13	-45.4	20.1688	-4.36	SLC2A10	solute carrier family 2 member 10
206140_at	7.64e-11	8.25e-13	-45.4	20.1613	-3.54	LHX2	LIM homeobox 2
226136_at	7.65e-11	8.27e-13	45.4	20.1584	4.19	GLIPR1	GLI pathogenesis related 1
1564220_a_at	7.65e-11	8.29e-13	45.4	20.1565	4.81	LINC01234	long intergenic non-protein coding RNA 1234
202990_at	7.65e-11	8.3e-13	45.4	20.1556	3.68	PYGL	phosphorylase, glycogen, liver
228988_at	7.68e-11	8.35e-13	-45.3	20.1491	-4.36	ZNF711	zinc finger protein 711
202949_s_at	7.68e-11	8.39e-13	45.3	20.1441	3.72	FHL2	four and a half LIM domains 2
213693_s_at	7.68e-11	8.4e-13	-45.3	20.1433	-3.88	MUC1	mucin 1, cell surface associated
1555579_s_at	7.68e-11	8.41e-13	45.3	20.1423	5.18	PTPRM	protein tyrosine phosphatase, receptor type M
214829_at	7.68e-11	8.42e-13	45.3	20.1416	4.12	AASS	aminoadipate-semialdehyde synthase
225646_at	7.68e-11	8.42e-13	45.3	20.1415	4.31	CTSC	cathepsin C
202422_s_at	7.7e-11	8.46e-13	45.3	20.1365	3.67	ACSL4	acyl-CoA synthetase long-chain family member 4
230264_s_at	7.7e-11	8.47e-13	45.3	20.1354	3.47	AP1S2	adaptor related protein complex 1 sigma 2 subunit
223687_s_at	7.71e-11	8.49e-13	45.3	20.1331	4.21	LY6K	lymphocyte antigen 6 complex, locus K
204420_at	7.77e-11	8.57e-13	45.2	20.1234	6.55	FOSL1	FOS like 1, AP-1 transcription factor subunit
205891_at	7.78e-11	8.59e-13	45.2	20.1212	3.83	ADORA2B	adenosine A2b receptor
223075_s_at	7.82e-11	8.65e-13	-45.2	20.1139	-3.78	AIF1L	allograft inflammatory factor 1 like
202627_s_at	7.87e-11	8.72e-13	45.1	20.1064	6.75	SERPINE1	serpin family E member 1
210875_s_at	7.89e-11	8.77e-13	45.1	20.1013	4.59	ZEB1	zinc finger E-box binding homeobox 1
205428_s_at	7.89e-11	8.77e-13	45.1	20.1007	3.65	CALB2	calbindin 2
203615_x_at	7.93e-11	8.84e-13	-45.1	20.093	-3.6	SULT1A1	sulfotransferase family 1A member 1
231766_s_at	7.93e-11	8.85e-13	45.1	20.0917	3.75	COL12A1	collagen type XII alpha 1 chain
235515_at	7.99e-11	8.93e-13	-45	20.0826	-4.09	SYNE4	spectrin repeat containing nuclear envelope family member 4
214110_s_at	8.01e-11	8.97e-13	45	20.0791	3.29	LOC654342///LOC645166	lymphocyte-specific protein 1 pseudogene///lymphocyte-specific protein 1 pseudogene
222853_at	8.03e-11	9e-13	-45	20.0755	-4.71	FLRT3	fibronectin leucine rich transmembrane protein 3
218980_at	8.06e-11	9.05e-13	45	20.0696	4.27	FHOD3	formin homology 2 domain containing 3
219429_at	8.1e-11	9.11e-13	-44.9	20.0631	-3.74	FA2H	fatty acid 2-hydroxylase
222240_s_at	8.1e-11	9.12e-13	-44.9	20.062	-4.21	ISYNA1	inositol-3-phosphate synthase 1
223655_at	8.11e-11	9.16e-13	44.9	20.0584	4.57	CD163L1	CD163 molecule like 1
207802_at	8.26e-11	9.34e-13	-44.8	20.0389	-3.52	CRISP3	cysteine rich secretory protein 3
227529_s_at	8.28e-11	9.38e-13	44.8	20.0349	5.08	AKAP12	A-kinase anchoring protein 12
217728_at	8.43e-11	9.56e-13	44.7	20.0154	3.81	S100A6	S100 calcium binding protein A6
202794_at	8.58e-11	9.74e-13	44.6	19.997	3.93	INPP1	inositol polyphosphate-1-phosphatase
228554_at	8.6e-11	9.79e-13	-44.6	19.9924	-3.93	PGR	progesterone receptor
214404_x_at	8.8e-11	1e-12	-44.5	19.9689	-3.47	SPDEF	SAM pointed domain containing ETS transcription factor
225867_at	8.81e-11	1.01e-12	-44.5	19.9654	-3.38	VASN	vasorin
205501_at	8.96e-11	1.02e-12	44.4	19.9475	4.31	PDE10A	phosphodiesterase 10A
233082_at	9.26e-11	1.06e-12	-44.3	19.9133	-3.64	ZNF630	zinc finger protein 630
219271_at	9.32e-11	1.07e-12	-44.2	19.9054	-4.21	GALNT14	polypeptide N-acetylgalactosaminyltransferase 14
227052_at	9.32e-11	1.07e-12	-44.2	19.9039	-3.86	SMIM14	small integral membrane protein 14
204472_at	9.33e-11	1.07e-12	44.2	19.9008	4.09	GEM	GTP binding protein overexpressed in skeletal muscle
228082_at	9.39e-11	1.08e-12	44.2	19.8933	3.42	CLMP	CXADR like membrane protein
204667_at	9.48e-11	1.09e-12	-44.1	19.8817	-4.17	FOXA1	forkhead box A1
208965_s_at	9.49e-11	1.1e-12	44.1	19.8794	5.8	IFI16	interferon gamma inducible protein 16
225327_at	9.55e-11	1.11e-12	-44.1	19.8708	-3.32	FAM214A	family with sequence similarity 214 member A
235570_at	9.55e-11	1.11e-12	44.1	19.8699	4.47	RBMS3	RNA binding motif single stranded interacting protein 3
202920_at	9.71e-11	1.13e-12	44	19.8521	5.32	ANK2	ankyrin 2, neuronal
202005_at	9.72e-11	1.13e-12	-44	19.8496	-3.41	ST14	suppression of tumorigenicity 14
201313_at	9.78e-11	1.14e-12	43.9	19.8414	3.24	ENO2	enolase 2
212325_at	9.78e-11	1.14e-12	43.9	19.8379	3.9	LIMCH1	LIM and calponin homology domains 1
208779_x_at	9.78e-11	1.14e-12	-43.9	19.8375	-3.5	MIR4640///DDR1	microRNA 4640///discoidin domain receptor tyrosine kinase 1
229970_at	9.78e-11	1.15e-12	-43.9	19.8368	-3.52	KBTBD7	kelch repeat and BTB domain containing 7
230574_at	9.82e-11	1.15e-12	43.9	19.8308	5.23	LOC100130938	uncharacterized LOC100130938
203153_at	9.82e-11	1.15e-12	43.9	19.8299	3.56	IFIT1	interferon induced protein with tetratricopeptide repeats 1
211737_x_at	9.96e-11	1.17e-12	43.8	19.8144	3.87	PTN	pleiotrophin
210297_s_at	1.01e-10	1.19e-12	-43.7	19.7971	-4.22	MSMB	microseminoprotein beta
204470_at	1.01e-10	1.2e-12	43.7	19.793	4.7	CXCL1	C-X-C motif chemokine ligand 1
206307_s_at	1.01e-10	1.2e-12	-43.7	19.7916	-3.42	FOXD1	forkhead box D1
227607_at	1.02e-10	1.2e-12	43.7	19.7864	3.28	STAMBPL1	STAM binding protein like 1
219395_at	1.03e-10	1.22e-12	-43.6	19.778	-3.59	MIR6773///ESRP2	microRNA 6773///epithelial splicing regulatory protein 2
219569_s_at	1.03e-10	1.22e-12	43.6	19.7759	4.42	SLC35G2	solute carrier family 35 member G2
209781_s_at	1.03e-10	1.23e-12	43.6	19.7692	3.64	KHDRBS3	KH RNA binding domain containing, signal transduction associated 3
35148_at	1.03e-10	1.23e-12	-43.6	19.7657	-4.76	TJP3	tight junction protein 3
202237_at	1.04e-10	1.24e-12	43.6	19.758	5.69	LOC101928916///NNMT	uncharacterized LOC101928916///nicotinamide N-methyltransferase
202156_s_at	1.04e-10	1.24e-12	43.6	19.7568	3.74	CELF2	CUGBP, Elav-like family member 2
206924_at	1.04e-10	1.24e-12	43.6	19.7567	4.65	IL11	interleukin 11
219860_at	1.05e-10	1.25e-12	-43.5	19.7469	-3.29	LY6G5C	lymphocyte antigen 6 complex, locus G5C
1554726_at	1.06e-10	1.28e-12	43.4	19.728	3.22	ZNF655	zinc finger protein 655
206488_s_at	1.07e-10	1.28e-12	-43.4	19.7261	-3.69	CD36	CD36 molecule
210042_s_at	1.08e-10	1.3e-12	43.4	19.712	4.31	CTSZ	cathepsin Z
204797_s_at	1.08e-10	1.3e-12	-43.3	19.7078	-3.96	EML1	echinoderm microtubule associated protein like 1
200736_s_at	1.09e-10	1.32e-12	43.3	19.6975	7.86	GPX1	glutathione peroxidase 1
235236_at	1.09e-10	1.32e-12	43.3	19.6932	4.36
205433_at	1.13e-10	1.37e-12	43.1	19.6587	4.22	BCHE	butyrylcholinesterase
219973_at	1.14e-10	1.38e-12	43.1	19.6479	3.43	ARSJ	arylsulfatase family member J
225790_at	1.15e-10	1.4e-12	43	19.6395	3.81	MSRB3	methionine sulfoxide reductase B3
202743_at	1.15e-10	1.4e-12	-43	19.6385	-3.75	PIK3R3	phosphoinositide-3-kinase regulatory subunit 3
218931_at	1.15e-10	1.4e-12	-43	19.6382	-4.3	RAB17	RAB17, member RAS oncogene family
211719_x_at	1.15e-10	1.4e-12	43	19.6373	3.07	FN1	fibronectin 1
212607_at	1.16e-10	1.42e-12	43	19.6212	4.11	AKT3	AKT serine/threonine kinase 3
231270_at	1.17e-10	1.43e-12	42.9	19.6145	3.83	LOC100507258///CA13	uncharacterized LOC100507258///carbonic anhydrase 13
228648_at	1.17e-10	1.43e-12	-42.9	19.6134	-3.16	LRG1	leucine rich alpha-2-glycoprotein 1
218986_s_at	1.17e-10	1.43e-12	42.9	19.6133	4.1	DDX60	DEXD/H-box helicase 60
1554006_a_at	1.17e-10	1.44e-12	-42.9	19.6099	-3.9	LLGL2	LLGL2, scribble cell polarity complex component
223658_at	1.18e-10	1.45e-12	-42.9	19.6024	-3.95	KCNK6	potassium two pore domain channel subfamily K member 6
218729_at	1.2e-10	1.48e-12	-42.8	19.5798	-3.65	LXN	latexin
223454_at	1.21e-10	1.49e-12	-42.7	19.5737	-4.35	CXCL16	C-X-C motif chemokine ligand 16
213093_at	1.21e-10	1.49e-12	42.7	19.5736	3.11	PRKCA	protein kinase C alpha
229310_at	1.21e-10	1.5e-12	42.7	19.5685	3.48	KLHL29	kelch like family member 29
216568_x_at	1.21e-10	1.51e-12	-42.7	19.5639	-3.56
212838_at	1.23e-10	1.52e-12	42.7	19.5533	3.39	DNMBP	dynamin binding protein
219932_at	1.23e-10	1.53e-12	-42.6	19.5476	-3.76	SLC27A6	solute carrier family 27 member 6
1555793_a_at	1.23e-10	1.54e-12	42.6	19.5438	4.03	ZFP82	ZFP82 zinc finger protein
213412_at	1.24e-10	1.55e-12	-42.6	19.5359	-3.67	TJP3	tight junction protein 3
1554007_at	1.26e-10	1.57e-12	-42.5	19.5205	-3.87
208358_s_at	1.26e-10	1.57e-12	42.5	19.5201	3.93	UGT8	UDP glycosyltransferase 8
204363_at	1.26e-10	1.57e-12	42.5	19.5199	4.39	F3	coagulation factor III, tissue factor
221577_x_at	1.27e-10	1.6e-12	-42.4	19.5025	-4.43	GDF15	growth differentiation factor 15
205279_s_at	1.27e-10	1.6e-12	42.4	19.5023	3.28	GLRB	glycine receptor beta
209946_at	1.27e-10	1.6e-12	42.4	19.5012	3.61	VEGFC	vascular endothelial growth factor C
39549_at	1.28e-10	1.61e-12	42.4	19.4993	3.51	NPAS2	neuronal PAS domain protein 2
227850_x_at	1.28e-10	1.62e-12	-42.4	19.4921	-3.48	CDC42EP5	CDC42 effector protein 5
226197_at	1.29e-10	1.63e-12	-42.4	19.4835	-4.21	AR	androgen receptor
206043_s_at	1.31e-10	1.65e-12	-42.3	19.4714	-3.52	ATP2C2	ATPase secretory pathway Ca2+ transporting 2
222664_at	1.31e-10	1.66e-12	-42.3	19.4671	-4.07	KCTD15	potassium channel tetramerization domain containing 15
38037_at	1.32e-10	1.67e-12	42.3	19.4612	4.46	HBEGF	heparin binding EGF like growth factor
227746_at	1.33e-10	1.69e-12	42.2	19.4505	3.34	ELAVL1	ELAV like RNA binding protein 1
214079_at	1.33e-10	1.7e-12	-42.2	19.4439	-3.96	DHRS2	dehydrogenase/reductase 2
210886_x_at	1.34e-10	1.71e-12	-42.2	19.4381	-3.53	TP53TG1	TP53 target 1 (non-protein coding)
220192_x_at	1.34e-10	1.72e-12	-42.1	19.4336	-4.02	SPDEF	SAM pointed domain containing ETS transcription factor
226145_s_at	1.34e-10	1.72e-12	-42.1	19.4331	-3.96	FRAS1	Fraser extracellular matrix complex subunit 1
203603_s_at	1.35e-10	1.73e-12	42.1	19.4284	4.03	ZEB2	zinc finger E-box binding homeobox 2
229623_at	1.38e-10	1.77e-12	-42	19.4049	-5.84	TMEM150C	transmembrane protein 150C
205042_at	1.38e-10	1.77e-12	42	19.4015	4.48	GNE	glucosamine (UDP-N-acetyl)-2-epimerase/N-acetylmannosamine kinase
218900_at	1.39e-10	1.79e-12	-42	19.3923	-3	CNNM4	cyclin and CBS domain divalent metal cation transport mediator 4
221489_s_at	1.4e-10	1.8e-12	41.9	19.3853	3.74	SPRY4	sprouty RTK signaling antagonist 4
1554127_s_at	1.4e-10	1.81e-12	41.9	19.3814	3.38	MSRB3	methionine sulfoxide reductase B3
210046_s_at	1.4e-10	1.81e-12	-41.9	19.3813	-3.3	IDH2	isocitrate dehydrogenase (NADP(+)) 2, mitochondrial
212912_at	1.4e-10	1.81e-12	41.9	19.3793	3.91	RPS6KA2	ribosomal protein S6 kinase A2
202790_at	1.41e-10	1.82e-12	-41.9	19.3744	-3.55	CLDN7	claudin 7
233092_s_at	1.41e-10	1.83e-12	41.9	19.3707	4.69
207655_s_at	1.41e-10	1.83e-12	-41.9	19.3705	-3.66	BLNK	B-cell linker
227742_at	1.41e-10	1.84e-12	41.9	19.3658	4.02	CLIC6	chloride intracellular channel 6
225582_at	1.45e-10	1.89e-12	41.7	19.3353	3.73	ITPRIP	inositol 1,4,5-trisphosphate receptor interacting protein
205443_at	1.45e-10	1.9e-12	41.7	19.3337	3.57	SNAPC1	small nuclear RNA activating complex polypeptide 1
1552546_a_at	1.47e-10	1.92e-12	41.7	19.3229	3.45	LETM2	leucine zipper and EF-hand containing transmembrane protein 2
220625_s_at	1.49e-10	1.95e-12	-41.6	19.3045	-3.29	ELF5	E74 like ETS transcription factor 5
205669_at	1.51e-10	1.98e-12	-41.5	19.2924	-3.18	NCAM2	neural cell adhesion molecule 2
227863_at	1.51e-10	1.98e-12	-41.5	19.2905	-3.69	IFITM10	interferon induced transmembrane protein 10
218966_at	1.53e-10	2.01e-12	-41.5	19.2756	-3.37	MYO5C	myosin VC
202631_s_at	1.54e-10	2.03e-12	-41.4	19.2669	-3.23	APPBP2	amyloid beta precursor protein binding protein 2
228457_at	1.54e-10	2.03e-12	-41.4	19.2668	-3.13	PPM1L	protein phosphatase, Mg2+/Mn2+ dependent 1L
223412_at	1.54e-10	2.03e-12	-41.4	19.2657	-3.14	KBTBD7	kelch repeat and BTB domain containing 7
235049_at	1.56e-10	2.06e-12	-41.4	19.25	-3.36	ADCY1	adenylate cyclase 1
1554576_a_at	1.58e-10	2.09e-12	41.3	19.2381	3.77	ETV4	ETS variant 4
210869_s_at	1.58e-10	2.09e-12	41.3	19.2371	4.37	MIR6756///MCAM	microRNA 6756///melanoma cell adhesion molecule
1553734_at	1.58e-10	2.09e-12	-41.3	19.2366	-5.2	AK7	adenylate kinase 7
208966_x_at	1.58e-10	2.1e-12	41.3	19.2337	6.76	IFI16	interferon gamma inducible protein 16
39402_at	1.58e-10	2.1e-12	41.3	19.2316	5.21	IL1B	interleukin 1 beta
242660_at	1.58e-10	2.1e-12	-41.3	19.2305	-3.96	MALRD1	MAM and LDL receptor class A domain containing 1
232099_at	1.58e-10	2.11e-12	-41.3	19.2254	-3.24	PCDHB16	protocadherin beta 16
203821_at	1.59e-10	2.12e-12	41.2	19.2205	4.81	HBEGF	heparin binding EGF like growth factor
210096_at	1.59e-10	2.13e-12	-41.2	19.217	-3.43	CYP4B1	cytochrome P450 family 4 subfamily B member 1
227309_at	1.59e-10	2.13e-12	41.2	19.2164	4.14	YOD1	YOD1 deubiquitinase
208378_x_at	1.59e-10	2.13e-12	41.2	19.215	3.49	FGF5	fibroblast growth factor 5
238695_s_at	1.6e-10	2.15e-12	-41.2	19.2058	-3.64	RAB39B	RAB39B, member RAS oncogene family
218195_at	1.61e-10	2.17e-12	-41.1	19.1972	-3	ARMT1	acidic residue methyltransferase 1
205073_at	1.61e-10	2.17e-12	-41.1	19.1971	-3.45	CYP2J2	cytochrome P450 family 2 subfamily J member 2
225171_at	1.62e-10	2.18e-12	41.1	19.1945	3.37	ARHGAP18	Rho GTPase activating protein 18
201445_at	1.62e-10	2.18e-12	41.1	19.1927	7.1	CNN3	calponin 3
219345_at	1.63e-10	2.2e-12	-41.1	19.1863	-4.42	BOLA1	bolA family member 1
226757_at	1.63e-10	2.2e-12	41.1	19.1843	3.47	IFIT2	interferon induced protein with tetratricopeptide repeats 2
224999_at	1.63e-10	2.21e-12	41.1	19.1808	3.99	EGFR	epidermal growth factor receptor
1007_s_at	1.63e-10	2.21e-12	-41.1	19.1797	-3.15	MIR4640///DDR1	microRNA 4640///discoidin domain receptor tyrosine kinase 1
218854_at	1.63e-10	2.22e-12	41.1	19.1753	3.73	DSE	dermatan sulfate epimerase
212923_s_at	1.65e-10	2.24e-12	41	19.1658	3.79	PXDC1	PX domain containing 1
213069_at	1.67e-10	2.27e-12	41	19.1523	3.54	HEG1	heart development protein with EGF like domains 1
212448_at	1.67e-10	2.28e-12	41	19.151	4.68	NEDD4L	neural precursor cell expressed, developmentally down-regulated 4-like, E3 ubiquitin protein ligase
241394_at	1.67e-10	2.29e-12	40.9	19.1462	4.07	LOC101928710	uncharacterized LOC101928710
235165_at	1.69e-10	2.31e-12	-40.9	19.1341	-3.81	PARD6B	par-6 family cell polarity regulator beta
224560_at	1.69e-10	2.31e-12	40.9	19.1341	3.49	TIMP2	TIMP metallopeptidase inhibitor 2
204286_s_at	1.7e-10	2.33e-12	40.8	19.1257	3	PMAIP1	phorbol-12-myristate-13-acetate-induced protein 1
213338_at	1.72e-10	2.36e-12	40.8	19.1154	5.1	TMEM158	transmembrane protein 158 (gene/pseudogene)
204396_s_at	1.72e-10	2.37e-12	40.8	19.1111	3.68	GRK5	G protein-coupled receptor kinase 5
226226_at	1.72e-10	2.37e-12	-40.8	19.1106	-3.08	TMEM45B	transmembrane protein 45B
226869_at	1.72e-10	2.37e-12	-40.8	19.1091	-3.05	MEGF6	multiple EGF like domains 6
243174_at	1.73e-10	2.38e-12	-40.8	19.1044	-3.91
202917_s_at	1.73e-10	2.39e-12	-40.7	19.1015	-3.3	S100A8	S100 calcium binding protein A8
209386_at	1.73e-10	2.39e-12	40.7	19.1003	7.1	TM4SF1	transmembrane 4 L six family member 1
204279_at	1.74e-10	2.41e-12	40.7	19.0926	3.73	PSMB9	proteasome subunit beta 9
200953_s_at	1.75e-10	2.42e-12	40.7	19.0873	5.73	CCND2	cyclin D2
1569110_x_at	1.75e-10	2.43e-12	-40.7	19.0858	-4.89	LOC728613	programmed cell death 6 pseudogene
202158_s_at	1.75e-10	2.44e-12	40.7	19.0808	4.46	CELF2	CUGBP, Elav-like family member 2
229332_at	1.75e-10	2.44e-12	-40.7	19.0792	-3.04	HPDL	4-hydroxyphenylpyruvate dioxygenase like
201141_at	1.76e-10	2.46e-12	-40.6	19.0727	-3.6	GPNMB	glycoprotein nmb
204134_at	1.78e-10	2.48e-12	40.6	19.0632	2.91	PDE2A	phosphodiesterase 2A
213895_at	1.79e-10	2.51e-12	40.5	19.0533	3.77	EMP1	epithelial membrane protein 1
209031_at	1.79e-10	2.51e-12	-40.5	19.0512	-3.12	CADM1	cell adhesion molecule 1
217869_at	1.8e-10	2.52e-12	40.5	19.0463	3.07	HSD17B12	hydroxysteroid 17-beta dehydrogenase 12
218689_at	1.81e-10	2.54e-12	-40.5	19.0419	-3.57	FANCF	Fanconi anemia complementation group F
226282_at	1.82e-10	2.55e-12	40.5	19.035	3.58	PTPN14	protein tyrosine phosphatase, non-receptor type 14
243729_at	1.82e-10	2.56e-12	-40.5	19.0332	-3.02
218445_at	1.82e-10	2.57e-12	-40.5	19.0301	-3.44	H2AFY2	H2A histone family member Y2
209014_at	1.84e-10	2.6e-12	-40.4	19.015	-2.9	MAGED1	MAGE family member D1
219795_at	1.86e-10	2.63e-12	-40.4	19.0063	-3.65	SLC6A14	solute carrier family 6 member 14
213462_at	1.86e-10	2.63e-12	40.4	19.0055	3.06	NPAS2	neuronal PAS domain protein 2
239787_at	1.88e-10	2.66e-12	40.3	18.9925	3.99	KCTD4	potassium channel tetramerization domain containing 4
239331_at	1.88e-10	2.67e-12	40.3	18.9908	4.14
210118_s_at	1.89e-10	2.68e-12	40.3	18.9864	4.58	IL1A	interleukin 1 alpha
224215_s_at	1.89e-10	2.69e-12	-40.3	18.9826	-3.39	DLL1	delta like canonical Notch ligand 1
206687_s_at	1.89e-10	2.69e-12	-40.3	18.981	-3.55	PTPN6	protein tyrosine phosphatase, non-receptor type 6
205990_s_at	1.89e-10	2.7e-12	40.2	18.9793	3.74	WNT5A	Wnt family member 5A
220892_s_at	1.89e-10	2.7e-12	40.2	18.9782	3.46	PSAT1	phosphoserine aminotransferase 1
223374_s_at	1.89e-10	2.7e-12	-40.2	18.9782	-3	B3GALNT1	beta-1,3-N-acetylgalactosaminyltransferase 1 (globoside blood group)
210105_s_at	1.9e-10	2.71e-12	40.2	18.9733	3.79	FYN	FYN proto-oncogene, Src family tyrosine kinase
225301_s_at	1.9e-10	2.72e-12	-40.2	18.9714	-3.37	MYO5B	myosin VB
223878_at	1.9e-10	2.72e-12	-40.2	18.9705	-2.88	INPP4B	inositol polyphosphate-4-phosphatase type II B
212445_s_at	1.92e-10	2.75e-12	40.2	18.9585	3.82	NEDD4L	neural precursor cell expressed, developmentally down-regulated 4-like, E3 ubiquitin protein ligase
212473_s_at	1.92e-10	2.77e-12	40.1	18.9543	2.86	MICAL2	microtubule associated monooxygenase, calponin and LIM domain containing 2
241813_at	1.96e-10	2.82e-12	40.1	18.9353	3.45	MBD1	methyl-CpG binding domain protein 1
202555_s_at	1.96e-10	2.83e-12	40.1	18.9312	3.35	MYLK	myosin light chain kinase
211458_s_at	1.96e-10	2.83e-12	40	18.93	3.88	GABARAPL3///GABARAPL1	GABA type A receptor associated protein like 3 pseudogene///GABA type A receptor associated protein like 1
209015_s_at	1.98e-10	2.86e-12	40	18.9205	3.03	DNAJB6	DnaJ heat shock protein family (Hsp40) member B6
1554640_at	1.98e-10	2.86e-12	40	18.9203	3.33	PALM2	paralemmin 2
215299_x_at	1.98e-10	2.87e-12	-40	18.9165	-3.67	SULT1A1	sulfotransferase family 1A member 1
203320_at	1.98e-10	2.87e-12	40	18.916	4.07	SH2B3	SH2B adaptor protein 3
231981_at	2e-10	2.91e-12	-39.9	18.9033	-3.35	PRLR	prolactin receptor
241706_at	2.01e-10	2.93e-12	39.9	18.8979	3.35	CPNE8	copine 8
205401_at	2.01e-10	2.93e-12	39.9	18.8954	4.3	AGPS	alkylglycerone phosphate synthase
214240_at	2.01e-10	2.93e-12	-39.9	18.8948	-3.12	GAL	galanin and GMAP prepropeptide
229432_at	2.02e-10	2.95e-12	39.9	18.8891	3.2	NAGS	N-acetylglutamate synthase
202704_at	2.02e-10	2.96e-12	-39.9	18.8864	-3.8	TOB1	transducer of ERBB2, 1
228969_at	2.02e-10	2.96e-12	-39.9	18.8849	-3.92	AGR2	anterior gradient 2, protein disulphide isomerase family member
235051_at	2.02e-10	2.96e-12	39.9	18.8847	3.76	CCDC50	coiled-coil domain containing 50
205756_s_at	2.02e-10	2.96e-12	39.9	18.8844	3.05	F8	coagulation factor VIII
220057_at	2.02e-10	2.97e-12	39.9	18.8822	4.09	XAGE1B///XAGE1E	X antigen family member 1B///X antigen family member 1E
203789_s_at	2.02e-10	2.98e-12	-39.8	18.8796	-3.45	SEMA3C	semaphorin 3C
204404_at	2.02e-10	2.98e-12	-39.8	18.8788	-3.05	SLC12A2	solute carrier family 12 member 2
205003_at	2.02e-10	2.98e-12	39.8	18.878	5.21	DOCK4	dedicator of cytokinesis 4
206298_at	2.02e-10	2.98e-12	39.8	18.878	3.19	ARHGAP22	Rho GTPase activating protein 22
227747_at	2.02e-10	2.99e-12	-39.8	18.8761	-3.49	MPZL3	myelin protein zero like 3
223821_s_at	2.03e-10	3e-12	-39.8	18.8714	-3.93	SUSD4	sushi domain containing 4
203889_at	2.03e-10	3.01e-12	39.8	18.869	3.5	SCG5	secretogranin V
220161_s_at	2.03e-10	3.01e-12	-39.8	18.8689	-3.3	EPB41L4B	erythrocyte membrane protein band 4.1 like 4B
227475_at	2.03e-10	3.02e-12	39.8	18.8652	3.06	FOXQ1	forkhead box Q1
206463_s_at	2.03e-10	3.03e-12	-39.8	18.8638	-3.53	DHRS2	dehydrogenase/reductase 2
213780_at	2.04e-10	3.04e-12	-39.8	18.8584	-3.39	TCHH	trichohyalin
217998_at	2.05e-10	3.06e-12	39.7	18.8518	3.09	PHLDA1	pleckstrin homology like domain family A member 1
201279_s_at	2.05e-10	3.06e-12	39.7	18.8515	3.07	LOC101926921///DAB2	uncharacterized LOC101926921///DAB2, clathrin adaptor protein
217388_s_at	2.06e-10	3.08e-12	-39.7	18.8467	-3.02	KYNU	kynureninase
212992_at	2.06e-10	3.09e-12	39.7	18.8426	3.32	AHNAK2	AHNAK nucleoprotein 2
206034_at	2.06e-10	3.09e-12	39.7	18.8419	3.62	SERPINB8	serpin family B member 8
236917_at	2.09e-10	3.13e-12	39.6	18.8292	4.05	LRRC34	leucine rich repeat containing 34
223694_at	2.1e-10	3.16e-12	-39.6	18.8206	-3.74	TRIM7	tripartite motif containing 7
226660_at	2.11e-10	3.18e-12	-39.6	18.8145	-3.31	RPS6KB1	ribosomal protein S6 kinase B1
229614_at	2.13e-10	3.21e-12	39.5	18.8045	3.14	ZNF320	zinc finger protein 320
206277_at	2.13e-10	3.21e-12	-39.5	18.8028	-2.94	P2RY2	purinergic receptor P2Y2
226099_at	2.13e-10	3.22e-12	39.5	18.8006	2.91	ELL2	elongation factor for RNA polymerase II 2
238702_at	2.13e-10	3.23e-12	-39.5	18.7993	-4.52	SPTSSB	serine palmitoyltransferase small subunit B
212472_at	2.14e-10	3.24e-12	39.5	18.7959	2.95	MICAL2	microtubule associated monooxygenase, calponin and LIM domain containing 2
206373_at	2.16e-10	3.27e-12	-39.5	18.7841	-4.05	ZIC1	Zic family member 1
215346_at	2.16e-10	3.28e-12	39.5	18.7825	2.89	CD40	CD40 molecule
232674_at	2.19e-10	3.33e-12	39.4	18.7674	3.37	UCN2	urocortin 2
218704_at	2.19e-10	3.34e-12	-39.4	18.7654	-3.59	RNF43	ring finger protein 43
244758_at	2.19e-10	3.34e-12	-39.4	18.7645	-2.97	ZBED9	zinc finger BED-type containing 9
219316_s_at	2.19e-10	3.35e-12	-39.4	18.7619	-3.5	FLVCR2	feline leukemia virus subgroup C cellular receptor family member 2
209387_s_at	2.2e-10	3.35e-12	39.4	18.76	6.66	TM4SF1	transmembrane 4 L six family member 1
226051_at	2.2e-10	3.36e-12	39.4	18.7573	4.1	SELM	selenoprotein M
203397_s_at	2.22e-10	3.4e-12	-39.3	18.7447	-3.11	GALNT3	polypeptide N-acetylgalactosaminyltransferase 3
210495_x_at	2.22e-10	3.41e-12	39.3	18.7434	2.85	FN1	fibronectin 1
218865_at	2.23e-10	3.42e-12	-39.3	18.74	-3	MARC1	mitochondrial amidoxime reducing component 1
219648_at	2.27e-10	3.48e-12	-39.2	18.7218	-3.04	MREG	melanoregulin
225303_at	2.28e-10	3.51e-12	39.2	18.7133	4.79	KIRREL	kin of IRRE like (Drosophila)
209287_s_at	2.29e-10	3.53e-12	39.2	18.7076	3.13	CDC42EP3	CDC42 effector protein 3
230748_at	2.31e-10	3.56e-12	-39.1	18.7003	-4.43	SLC16A6	solute carrier family 16 member 6
228707_at	2.31e-10	3.57e-12	-39.1	18.6975	-3.16	CLDN23	claudin 23
201559_s_at	2.35e-10	3.63e-12	39.1	18.6806	3.11	CLIC4	chloride intracellular channel 4
244025_at	2.37e-10	3.66e-12	39	18.6711	3.52	ITPRIP	inositol 1,4,5-trisphosphate receptor interacting protein
218976_at	2.37e-10	3.66e-12	-39	18.6702	-3.04	DNAJC12	DnaJ heat shock protein family (Hsp40) member C12
203713_s_at	2.37e-10	3.67e-12	-39	18.6688	-4.4	LLGL2	LLGL2, scribble cell polarity complex component
200824_at	2.37e-10	3.68e-12	39	18.6671	4.79	GSTP1	glutathione S-transferase pi 1
242414_at	2.41e-10	3.75e-12	-38.9	18.6477	-3.72	QPRT	quinolinate phosphoribosyltransferase
204990_s_at	2.43e-10	3.79e-12	-38.9	18.6363	-3.95	ITGB4	integrin subunit beta 4
207847_s_at	2.45e-10	3.82e-12	-38.9	18.629	-4.43	MUC1	mucin 1, cell surface associated
238646_at	2.45e-10	3.82e-12	-38.8	18.6269	-3.06
223423_at	2.48e-10	3.87e-12	-38.8	18.6137	-3.33	GPR160	G protein-coupled receptor 160
1568593_a_at	2.48e-10	3.88e-12	38.8	18.611	3.72	NUDT16P1	nudix hydrolase 16 pseudogene 1
227480_at	2.48e-10	3.89e-12	-38.8	18.6095	-3.18	SUSD2	sushi domain containing 2
224772_at	2.48e-10	3.89e-12	38.8	18.6091	4.47	NAV1	neuron navigator 1
203438_at	2.5e-10	3.92e-12	-38.7	18.6023	-3.31	STC2	stanniocalcin 2
226694_at	2.5e-10	3.93e-12	38.7	18.6003	8.32	PALM2-AKAP2///AKAP2	PALM2-AKAP2 readthrough///A-kinase anchoring protein 2
232843_s_at	2.51e-10	3.94e-12	-38.7	18.5955	-3.35	DOCK8	dedicator of cytokinesis 8
219093_at	2.54e-10	4e-12	38.7	18.5818	4.12	PID1	phosphotyrosine interaction domain containing 1
36711_at	2.54e-10	4.01e-12	38.7	18.5797	4.71	MAFF	MAF bZIP transcription factor F
227345_at	2.55e-10	4.02e-12	38.6	18.5751	4.51	TNFRSF10D	TNF receptor superfamily member 10d
213848_at	2.6e-10	4.12e-12	38.6	18.5524	2.78	DUSP7	dual specificity phosphatase 7
211778_s_at	2.62e-10	4.15e-12	-38.5	18.5447	-3.23	OVOL2	ovo like zinc finger 2
202766_s_at	2.63e-10	4.16e-12	38.5	18.5403	3.72	FBN1	fibrillin 1
234529_at	2.65e-10	4.2e-12	-38.5	18.5321	-4.12	PCGEM1	PCGEM1, prostate-specific transcript (non-protein coding)
209692_at	2.65e-10	4.21e-12	-38.5	18.5297	-3.23	EYA2	EYA transcriptional coactivator and phosphatase 2
232035_at	2.66e-10	4.23e-12	-38.5	18.5252	-3.09	HIST1H4H	histone cluster 1, H4h
225299_at	2.66e-10	4.24e-12	-38.4	18.523	-3.03	MYO5B	myosin VB
204867_at	2.67e-10	4.25e-12	-38.4	18.5191	-3.26	GCHFR	GTP cyclohydrolase I feedback regulator
218394_at	2.68e-10	4.27e-12	-38.4	18.5153	-3.34	ROGDI	rogdi homolog
204179_at	2.68e-10	4.27e-12	-38.4	18.5143	-3.38	MB	myoglobin
205253_at	2.68e-10	4.28e-12	-38.4	18.5119	-2.98	PBX1	PBX homeobox 1
218820_at	2.69e-10	4.3e-12	-38.4	18.5068	-3.26	C14orf132	chromosome 14 open reading frame 132
203741_s_at	2.7e-10	4.32e-12	38.4	18.5036	3.07	ADCY7	adenylate cyclase 7
206527_at	2.7e-10	4.33e-12	-38.4	18.5018	-3.09	ABAT	4-aminobutyrate aminotransferase
209487_at	2.7e-10	4.34e-12	-38.3	18.4978	-2.91	RBPMS	RNA binding protein with multiple splicing
206703_at	2.7e-10	4.35e-12	38.3	18.497	4.16	CHRNB1	cholinergic receptor nicotinic beta 1 subunit
201349_at	2.7e-10	4.35e-12	-38.3	18.4955	-3.15	SLC9A3R1	SLC9A3 regulator 1
227760_at	2.72e-10	4.39e-12	38.3	18.4867	3.14	IGFBPL1	insulin like growth factor binding protein like 1
205964_at	2.72e-10	4.4e-12	38.3	18.4855	3.21	ZNF426	zinc finger protein 426
218806_s_at	2.73e-10	4.41e-12	-38.3	18.4816	-3.5	VAV3	vav guanine nucleotide exchange factor 3
225381_at	2.73e-10	4.42e-12	38.3	18.4797	6.12	MIR100HG	mir-100-let-7a-2 cluster host gene
212328_at	2.75e-10	4.45e-12	38.2	18.4725	4.65	LIMCH1	LIM and calponin homology domains 1
244533_at	2.75e-10	4.46e-12	38.2	18.4702	3.71	PTPN14	protein tyrosine phosphatase, non-receptor type 14
1557779_at	2.76e-10	4.48e-12	-38.2	18.4657	-3.07	LINC01468	long intergenic non-protein coding RNA 1468
204298_s_at	2.76e-10	4.48e-12	38.2	18.4656	3.44	LOX	lysyl oxidase
204542_at	2.77e-10	4.5e-12	-38.2	18.4625	-3.49	ST6GALNAC2	ST6 N-acetylgalactosaminide alpha-2,6-sialyltransferase 2
224817_at	2.77e-10	4.51e-12	38.2	18.4602	3.47	SH3PXD2A	SH3 and PX domains 2A
235955_at	2.79e-10	4.55e-12	-38.2	18.4508	-3.8	MARVELD2	MARVEL domain containing 2
212771_at	2.79e-10	4.55e-12	38.2	18.4499	5.3	FAM171A1	family with sequence similarity 171 member A1
240349_at	2.8e-10	4.57e-12	38.1	18.4451	2.94	PRKAA2	protein kinase AMP-activated catalytic subunit alpha 2
206501_x_at	2.81e-10	4.6e-12	38.1	18.4402	2.84	ETV1	ETS variant 1
223690_at	2.82e-10	4.62e-12	38.1	18.4342	3.16	LTBP2	latent transforming growth factor beta binding protein 2
226834_at	2.83e-10	4.64e-12	38.1	18.4311	4.67	CLMP	CXADR like membrane protein
205266_at	2.83e-10	4.64e-12	38.1	18.4309	3.14	LIF	leukemia inhibitory factor
201666_at	2.83e-10	4.65e-12	38.1	18.429	3	TIMP1	TIMP metallopeptidase inhibitor 1
219432_at	2.84e-10	4.67e-12	38.1	18.4247	3.14	EVC	EvC ciliary complex subunit 1
213117_at	2.85e-10	4.7e-12	-38	18.4174	-3.43	KLHL9	kelch like family member 9
230075_at	2.85e-10	4.7e-12	-38	18.4174	-3.81	RAB39B	RAB39B, member RAS oncogene family
209087_x_at	2.86e-10	4.72e-12	38	18.4133	3.78	MCAM	melanoma cell adhesion molecule
231879_at	2.86e-10	4.73e-12	38	18.4112	3.44	COL12A1	collagen type XII alpha 1 chain
239210_at	2.87e-10	4.74e-12	-38	18.4089	-3.54	LOC102724387	uncharacterized LOC102724387
218731_s_at	2.89e-10	4.78e-12	-38	18.3999	-3.07	VWA1	von Willebrand factor A domain containing 1
211796_s_at	2.91e-10	4.82e-12	37.9	18.3925	4.41	TRBC1	T cell receptor beta constant 1
209871_s_at	2.95e-10	4.89e-12	37.9	18.3761	2.83	APBA2	amyloid beta precursor protein binding family A member 2
213562_s_at	2.95e-10	4.9e-12	-37.9	18.3746	-3.77	SQLE	squalene epoxidase
234307_s_at	2.97e-10	4.94e-12	-37.8	18.3662	-3.5	KIF26A	kinesin family member 26A
219704_at	2.99e-10	4.97e-12	-37.8	18.3602	-3.1	YBX2	Y-box binding protein 2
220750_s_at	3e-10	5e-12	37.8	18.3551	2.72	P3H1	prolyl 3-hydroxylase 1
232322_x_at	3e-10	5e-12	-37.8	18.3535	-4.21	STARD10	StAR related lipid transfer domain containing 10
203896_s_at	3.01e-10	5.03e-12	-37.8	18.3481	-3.82	PLCB4	phospholipase C beta 4
232849_at	3.01e-10	5.03e-12	-37.8	18.3476	-2.82	LOC100128988	uncharacterized LOC100128988
205153_s_at	3.01e-10	5.04e-12	37.8	18.3464	3.18	CD40	CD40 molecule
241014_at	3.01e-10	5.04e-12	37.8	18.3454	3.32	FLG-AS1	FLG antisense RNA 1
225973_at	3.02e-10	5.06e-12	37.8	18.3418	2.87	TAP2	transporter 2, ATP binding cassette subfamily B member
207173_x_at	3.02e-10	5.07e-12	-37.7	18.341	-3.35	CDH11	cadherin 11
218921_at	3.03e-10	5.08e-12	-37.7	18.3373	-2.87	SIGIRR	single Ig and TIR domain containing
228551_at	3.06e-10	5.15e-12	37.7	18.3239	3.13	DENND5B	DENN domain containing 5B
212464_s_at	3.1e-10	5.23e-12	37.6	18.3095	2.87	FN1	fibronectin 1
233305_at	3.1e-10	5.24e-12	-37.6	18.307	-4	NECAB1	N-terminal EF-hand calcium binding protein 1
203300_x_at	3.1e-10	5.24e-12	37.6	18.306	3.69	AP1S2	adaptor related protein complex 1 sigma 2 subunit
223497_at	3.1e-10	5.25e-12	37.6	18.3051	3.35	FAM135A	family with sequence similarity 135 member A
240192_at	3.1e-10	5.25e-12	-37.6	18.3049	-3.53	GATA3-AS1	GATA3 antisense RNA 1
1563057_at	3.1e-10	5.25e-12	37.6	18.3041	4.35
207862_at	3.12e-10	5.29e-12	-37.6	18.2966	-3.12	UPK2	uroplakin 2
205691_at	3.16e-10	5.38e-12	-37.5	18.2806	-3.91	SYNGR3	synaptogyrin 3
223622_s_at	3.16e-10	5.38e-12	37.5	18.2806	3.66	HYI	hydroxypyruvate isomerase (putative)
222719_s_at	3.16e-10	5.38e-12	37.5	18.2791	5.59	PDGFC	platelet derived growth factor C
36499_at	3.16e-10	5.38e-12	-37.5	18.2789	-2.76	CELSR2	cadherin EGF LAG seven-pass G-type receptor 2
243711_at	3.21e-10	5.47e-12	37.5	18.2629	2.84	DDAH1	dimethylarginine dimethylaminohydrolase 1
216336_x_at	3.22e-10	5.5e-12	37.4	18.2571	3.68	MT1E	metallothionein 1E
212859_x_at	3.22e-10	5.51e-12	37.4	18.2559	5.13	MT1E	metallothionein 1E
229372_at	3.23e-10	5.52e-12	-37.4	18.2533	-3.12	GOLT1A	golgi transport 1A
201995_at	3.24e-10	5.54e-12	37.4	18.25	3.12	EXT1	exostosin glycosyltransferase 1
210311_at	3.28e-10	5.62e-12	37.4	18.2353	2.97	FGF5	fibroblast growth factor 5
219368_at	3.29e-10	5.66e-12	-37.3	18.229	-3.6	NAP1L2	nucleosome assembly protein 1 like 2
210138_at	3.29e-10	5.66e-12	37.3	18.2283	3.85	RGS20	regulator of G-protein signaling 20
223233_s_at	3.3e-10	5.67e-12	-37.3	18.2255	-3.34	CGN	cingulin
205067_at	3.3e-10	5.68e-12	37.3	18.2244	4.97	IL1B	interleukin 1 beta
207501_s_at	3.3e-10	5.69e-12	-37.3	18.2227	-3.05	FGF12	fibroblast growth factor 12
203817_at	3.3e-10	5.7e-12	37.3	18.221	4.11	GUCY1B3	guanylate cyclase 1 soluble subunit beta
206382_s_at	3.3e-10	5.7e-12	37.3	18.2208	4.32	BDNF	brain derived neurotrophic factor
211824_x_at	3.31e-10	5.72e-12	37.3	18.2182	2.82	NLRP1	NLR family pyrin domain containing 1
202625_at	3.31e-10	5.73e-12	37.3	18.2158	3.05	LYN	LYN proto-oncogene, Src family tyrosine kinase
320_at	3.31e-10	5.73e-12	37.3	18.2158	2.92	PEX6	peroxisomal biogenesis factor 6
201015_s_at	3.31e-10	5.73e-12	-37.3	18.2147	-3.52	JUP	junction plakoglobin
218796_at	3.31e-10	5.75e-12	37.3	18.2126	3.54	FERMT1	fermitin family member 1
224367_at	3.37e-10	5.86e-12	-37.2	18.1934	-2.96	BEX2	brain expressed X-linked 2
202558_s_at	3.37e-10	5.87e-12	37.2	18.1917	3.47	HSPA13	heat shock protein family A (Hsp70) member 13
1557302_at	3.38e-10	5.89e-12	-37.2	18.1882	-3.4	ZNF585B	zinc finger protein 585B
225806_at	3.44e-10	5.99e-12	37.1	18.1705	2.66	AJUBA	ajuba LIM protein
202145_at	3.44e-10	5.99e-12	-37.1	18.1696	-3.97	LY6E	lymphocyte antigen 6 complex, locus E
211379_x_at	3.45e-10	6.02e-12	-37.1	18.1648	-3.2	B3GALNT1	beta-1,3-N-acetylgalactosaminyltransferase 1 (globoside blood group)
211742_s_at	3.45e-10	6.04e-12	37.1	18.162	3.63	EVI2B	ecotropic viral integration site 2B
57588_at	3.47e-10	6.07e-12	-37.1	18.1569	-3.36	SLC24A3	solute carrier family 24 member 3
229011_at	3.47e-10	6.07e-12	37.1	18.1561	4.48	EMP1	epithelial membrane protein 1
201596_x_at	3.47e-10	6.09e-12	-37	18.1531	-2.67	KRT18	keratin 18
202685_s_at	3.49e-10	6.13e-12	37	18.1472	4.79	AXL	AXL receptor tyrosine kinase
235498_at	3.5e-10	6.15e-12	37	18.143	2.85	LRRIQ3	leucine rich repeats and IQ motif containing 3
227318_at	3.56e-10	6.26e-12	-36.9	18.126	-3.26	TMEM178B	transmembrane protein 178B
228320_x_at	3.56e-10	6.27e-12	-36.9	18.1241	-2.77	BICDL1	BICD family like cargo adaptor 1
236180_at	3.56e-10	6.27e-12	36.9	18.1235	2.97
223779_at	3.57e-10	6.3e-12	36.9	18.1192	2.73	AFAP1-AS1	AFAP1 antisense RNA 1
219327_s_at	3.58e-10	6.32e-12	-36.9	18.1152	-2.89	GPRC5C	G protein-coupled receptor class C group 5 member C
209276_s_at	3.59e-10	6.34e-12	36.9	18.1118	3.97	GLRX	glutaredoxin
206546_at	3.59e-10	6.35e-12	-36.9	18.1105	-3.34	SYCP2	synaptonemal complex protein 2
205342_s_at	3.59e-10	6.36e-12	36.9	18.1099	2.83	SULT1C2	sulfotransferase family 1C member 2
213931_at	3.61e-10	6.4e-12	-36.9	18.1023	-3.06	ID2B///ID2	inhibitor of DNA binding 2B, HLH protein (pseudogene)///inhibitor of DNA binding 2, HLH protein
230311_s_at	3.63e-10	6.45e-12	-36.8	18.0945	-2.81	PRDM6	PR/SET domain 6
216905_s_at	3.65e-10	6.49e-12	-36.8	18.0878	-3.8	ST14	suppression of tumorigenicity 14
230406_at	3.65e-10	6.5e-12	-36.8	18.0864	-3.65
207334_s_at	3.67e-10	6.54e-12	36.8	18.0812	2.87	TGFBR2	transforming growth factor beta receptor 2
205439_at	3.68e-10	6.57e-12	36.8	18.0761	3.19	GSTT2	glutathione S-transferase theta 2 (gene/pseudogene)
212339_at	3.7e-10	6.61e-12	-36.7	18.0704	-3.8	EPB41L1	erythrocyte membrane protein band 4.1 like 1
210202_s_at	3.71e-10	6.64e-12	36.7	18.0658	2.91	BIN1	bridging integrator 1
203725_at	3.72e-10	6.65e-12	36.7	18.0631	3.03	GADD45A	growth arrest and DNA damage inducible alpha
228794_at	3.72e-10	6.67e-12	36.7	18.061	3.55	XIRP2	xin actin binding repeat containing 2
207331_at	3.72e-10	6.68e-12	36.7	18.0595	3.2	CENPF	centromere protein F
220613_s_at	3.74e-10	6.71e-12	-36.7	18.0548	-3.79	SYTL2	synaptotagmin like 2
1570153_at	3.76e-10	6.76e-12	36.7	18.0471	3.68	CCDC169	coiled-coil domain containing 169
209777_s_at	3.76e-10	6.76e-12	-36.7	18.0468	-2.87	SLC19A1	solute carrier family 19 member 1
213912_at	3.78e-10	6.8e-12	-36.6	18.0411	-3.19	TBC1D30	TBC1 domain family member 30
218858_at	3.79e-10	6.82e-12	-36.6	18.0375	-2.94	DEPTOR	DEP domain containing MTOR-interacting protein
207169_x_at	3.83e-10	6.91e-12	-36.6	18.0241	-3.85	MIR4640///DDR1	microRNA 4640///discoidin domain receptor tyrosine kinase 1
214746_s_at	3.83e-10	6.91e-12	-36.6	18.0239	-2.93	ZNF467	zinc finger protein 467
230644_at	3.83e-10	6.92e-12	-36.6	18.0234	-3.18	LRFN5	leucine rich repeat and fibronectin type III domain containing 5
206299_at	3.84e-10	6.95e-12	-36.6	18.0191	-2.69	FAM155B	family with sequence similarity 155 member B
203287_at	3.84e-10	6.96e-12	-36.6	18.0175	-3.82	LAD1	ladinin 1
228796_at	3.85e-10	6.98e-12	-36.5	18.0143	-4.22	CPNE4	copine 4
206429_at	3.86e-10	7e-12	36.5	18.0114	3.76	F2RL1	F2R like trypsin receptor 1
227326_at	3.87e-10	7.02e-12	36.5	18.0077	2.89	MXRA7	matrix remodeling associated 7
222603_at	3.89e-10	7.07e-12	-36.5	18.0003	-3.44	ERMP1	endoplasmic reticulum metallopeptidase 1
243027_at	3.91e-10	7.13e-12	-36.5	17.9923	-3.51	IGSF5	immunoglobulin superfamily member 5
228062_at	3.91e-10	7.13e-12	36.5	17.9922	4.09	NAP1L5	nucleosome assembly protein 1 like 5
204796_at	3.92e-10	7.14e-12	-36.5	17.9908	-3.13	EML1	echinoderm microtubule associated protein like 1
237329_at	3.94e-10	7.2e-12	36.4	17.9829	2.92	RBMS3-AS3	RBMS3 antisense RNA 3
220999_s_at	3.94e-10	7.21e-12	-36.4	17.9809	-2.86	CYFIP2	cytoplasmic FMR1 interacting protein 2
209435_s_at	3.94e-10	7.21e-12	36.4	17.9808	2.83	ARHGEF2	Rho/Rac guanine nucleotide exchange factor 2
209286_at	3.94e-10	7.22e-12	36.4	17.9798	4.99	CDC42EP3	CDC42 effector protein 3
217761_at	3.95e-10	7.23e-12	-36.4	17.9773	-2.65	ADI1	acireductone dioxygenase 1
202269_x_at	3.95e-10	7.24e-12	36.4	17.976	3.5	GBP1	guanylate binding protein 1
228978_at	3.96e-10	7.29e-12	-36.4	17.9696	-3.07	TBX2-AS1	TBX2 antisense RNA 1
228072_at	3.96e-10	7.29e-12	-36.4	17.9692	-3.19	SYT12	synaptotagmin 12
224822_at	3.96e-10	7.29e-12	36.4	17.969	3.27	DLC1	DLC1 Rho GTPase activating protein
204984_at	3.96e-10	7.3e-12	-36.4	17.9683	-3.61	GPC4	glypican 4
204019_s_at	3.97e-10	7.31e-12	-36.4	17.9661	-3.27	SH3YL1	SH3 and SYLF domain containing 1
204385_at	3.98e-10	7.34e-12	-36.4	17.9623	-3.5	KYNU	kynureninase
212636_at	3.99e-10	7.36e-12	36.3	17.9594	3.33	QKI	QKI, KH domain containing RNA binding
225720_at	4.03e-10	7.46e-12	-36.3	17.9459	-3.61	SYNPO2	synaptopodin 2
210201_x_at	4.04e-10	7.47e-12	36.3	17.944	3.25	BIN1	bridging integrator 1
219412_at	4.06e-10	7.52e-12	36.3	17.9374	3.11	RAB38	RAB38, member RAS oncogene family
218342_s_at	4.06e-10	7.53e-12	-36.3	17.9358	-3.05	ERMP1	endoplasmic reticulum metallopeptidase 1
209035_at	4.11e-10	7.62e-12	-36.2	17.924	-3.77	MDK	midkine (neurite growth-promoting factor 2)
223427_s_at	4.12e-10	7.66e-12	-36.2	17.9191	-3.62	EPB41L4B	erythrocyte membrane protein band 4.1 like 4B
32137_at	4.17e-10	7.76e-12	-36.1	17.9055	-2.73	JAG2	jagged 2
1552755_at	4.18e-10	7.78e-12	-36.1	17.9031	-2.65	C9orf66	chromosome 9 open reading frame 66
230991_at	4.2e-10	7.82e-12	-36.1	17.8978	-3.33	LOC102724156	uncharacterized LOC102724156
226028_at	4.24e-10	7.91e-12	36.1	17.8861	3.47	ROBO4	roundabout guidance receptor 4
1554246_at	4.24e-10	7.92e-12	-36.1	17.8841	-3.03	C1orf210	chromosome 1 open reading frame 210
212489_at	4.25e-10	7.95e-12	36.1	17.8809	3.65	COL5A1	collagen type V alpha 1 chain
205226_at	4.25e-10	7.95e-12	-36.1	17.8809	-3.37	PDGFRL	platelet derived growth factor receptor like
226909_at	4.25e-10	7.96e-12	36.1	17.8799	3.48	ZNF518B	zinc finger protein 518B
203642_s_at	4.25e-10	7.96e-12	-36.1	17.8794	-3.03	COBLL1	cordon-bleu WH2 repeat protein like 1
222572_at	4.25e-10	7.98e-12	36	17.8771	2.87	PDP1	pyruvate dehyrogenase phosphatase catalytic subunit 1
218657_at	4.27e-10	8.02e-12	-36	17.8722	-2.72	RAPGEFL1	Rap guanine nucleotide exchange factor like 1
74694_s_at	4.3e-10	8.08e-12	-36	17.8638	-3.1	RABEP2	rabaptin, RAB GTPase binding effector protein 2
206346_at	4.32e-10	8.12e-12	-36	17.8586	-3.2	PRLR	prolactin receptor
1552477_a_at	4.33e-10	8.16e-12	-36	17.8541	-3.34	IRF6	interferon regulatory factor 6
238521_at	4.34e-10	8.18e-12	-36	17.851	-3.46	FGF12	fibroblast growth factor 12
1556121_at	4.35e-10	8.22e-12	35.9	17.8465	2.87	NAP1L1	nucleosome assembly protein 1 like 1
203325_s_at	4.36e-10	8.23e-12	35.9	17.8447	2.89	COL5A1	collagen type V alpha 1 chain
225079_at	4.36e-10	8.24e-12	-35.9	17.8442	-3.09	EMP2	epithelial membrane protein 2
221773_at	4.39e-10	8.3e-12	35.9	17.8364	2.82	ELK3	ELK3, ETS transcription factor
235931_at	4.4e-10	8.33e-12	-35.9	17.8331	-2.92	METTL21A	methyltransferase like 21A
235408_x_at	4.41e-10	8.36e-12	-35.9	17.8293	-3.07	ZNF117	zinc finger protein 117
212609_s_at	4.43e-10	8.41e-12	35.9	17.8234	3.8	AKT3	AKT serine/threonine kinase 3
1556209_at	4.44e-10	8.43e-12	35.8	17.8208	3.68	CLEC2B	C-type lectin domain family 2 member B
1552275_s_at	4.45e-10	8.47e-12	35.8	17.8155	3.57	PXK	PX domain containing serine/threonine kinase like
204683_at	4.45e-10	8.48e-12	35.8	17.815	2.9	ICAM2	intercellular adhesion molecule 2
218950_at	4.45e-10	8.48e-12	35.8	17.8144	3.28	ARAP3	ArfGAP with RhoGAP domain, ankyrin repeat and PH domain 3
209990_s_at	4.45e-10	8.49e-12	-35.8	17.8134	-2.72	GABBR2	gamma-aminobutyric acid type B receptor subunit 2
227385_at	4.45e-10	8.51e-12	-35.8	17.8114	-3.58	PLPP6	phospholipid phosphatase 6
209591_s_at	4.45e-10	8.51e-12	-35.8	17.8106	-4.68	BMP7	bone morphogenetic protein 7
212190_at	4.46e-10	8.53e-12	35.8	17.8084	3.45	SERPINE2	serpin family E member 2
216442_x_at	4.46e-10	8.54e-12	35.8	17.8076	2.99	FN1	fibronectin 1
221059_s_at	4.54e-10	8.7e-12	35.7	17.7878	2.86	COTL1	coactosin like F-actin binding protein 1
1558943_x_at	4.54e-10	8.71e-12	35.7	17.7866	3.2	ZNF765	zinc finger protein 765
228577_x_at	4.54e-10	8.73e-12	35.7	17.7852	4.47	ODF2L	outer dense fiber of sperm tails 2 like
203921_at	4.59e-10	8.82e-12	35.7	17.7746	3.24	CHST2	carbohydrate sulfotransferase 2
1555292_at	4.59e-10	8.83e-12	35.7	17.7727	3.31	STRIP2	striatin interacting protein 2
225784_s_at	4.6e-10	8.86e-12	35.7	17.7694	3.21	ZC4H2	zinc finger C4H2-type containing
226347_at	4.62e-10	8.9e-12	35.6	17.7649	3.58
206695_x_at	4.63e-10	8.94e-12	-35.6	17.7607	-3.09	ZNF43	zinc finger protein 43
203343_at	4.63e-10	8.94e-12	-35.6	17.7605	-2.98	UGDH	UDP-glucose 6-dehydrogenase
227306_at	4.63e-10	8.95e-12	-35.6	17.7596	-2.87	ACER2	alkaline ceramidase 2
1558871_at	4.65e-10	8.99e-12	35.6	17.7543	3.69	LOC105377276	uncharacterized LOC105377276
229205_at	4.66e-10	9.03e-12	-35.6	17.7495	-2.74	ZNF793-AS1	ZNF793 antisense RNA 1 (head to head)
202973_x_at	4.67e-10	9.05e-12	35.6	17.7482	2.8	FAM13A	family with sequence similarity 13 member A
203807_x_at	4.7e-10	9.11e-12	-35.6	17.7406	-3.37	GH1///CSHL1///CSH2///CSH1	growth hormone 1///chorionic somatomammotropin hormone like 1///chorionic somatomammotropin hormone 2///chorionic somatomammotropin hormone 1
210762_s_at	4.7e-10	9.13e-12	35.6	17.7391	3.55	DLC1	DLC1 Rho GTPase activating protein
200600_at	4.8e-10	9.33e-12	35.5	17.7161	7.31	MSN	moesin
225721_at	4.86e-10	9.45e-12	-35.4	17.7029	-2.66	SYNPO2	synaptopodin 2
52940_at	4.9e-10	9.54e-12	-35.4	17.6937	-2.97	SIGIRR	single Ig and TIR domain containing
213158_at	4.9e-10	9.56e-12	35.4	17.6918	3.47	ZBTB20	zinc finger and BTB domain containing 20
223769_x_at	4.92e-10	9.6e-12	35.4	17.6876	3.18	HYI	hydroxypyruvate isomerase (putative)
1553764_a_at	4.96e-10	9.68e-12	35.3	17.6786	2.85	AJUBA	ajuba LIM protein
223822_at	5e-10	9.78e-12	-35.3	17.6686	-2.92	SUSD4	sushi domain containing 4
203788_s_at	5.01e-10	9.8e-12	-35.3	17.6655	-3.08	SEMA3C	semaphorin 3C
220387_s_at	5.02e-10	9.82e-12	-35.3	17.6634	-3.25	HHLA3	HERV-H LTR-associating 3
202902_s_at	5.08e-10	9.97e-12	35.2	17.6484	3.02	CTSS	cathepsin S
206723_s_at	5.09e-10	9.98e-12	-35.2	17.6471	-3	LPAR2	lysophosphatidic acid receptor 2
215446_s_at	5.11e-10	1e-11	35.2	17.6418	4.48	LOX	lysyl oxidase
227637_at	5.11e-10	1e-11	35.2	17.6406	2.88	TFCP2	transcription factor CP2
1554001_at	5.12e-10	1.01e-11	-35.2	17.6366	-4.18	TRIM37	tripartite motif containing 37
217838_s_at	5.12e-10	1.01e-11	-35.2	17.6357	-3.42	EVL	Enah/Vasp-like
205899_at	5.14e-10	1.01e-11	35.2	17.6307	4.05	CCNA1	cyclin A1
226103_at	5.16e-10	1.02e-11	35.2	17.6271	3.48	NEXN	nexilin F-actin binding protein
1555938_x_at	5.21e-10	1.03e-11	35.1	17.615	3.96	VIM	vimentin
236741_at	5.22e-10	1.03e-11	35.1	17.6116	3.13	WDR72	WD repeat domain 72
202863_at	5.22e-10	1.03e-11	35.1	17.6116	2.68	SP100	SP100 nuclear antigen
244552_at	5.24e-10	1.04e-11	35.1	17.6071	3.48	ZNF788	zinc finger family member 788
204545_at	5.25e-10	1.04e-11	35.1	17.6034	4.05	PEX6	peroxisomal biogenesis factor 6
230788_at	5.25e-10	1.04e-11	35.1	17.6027	3.62	GCNT2	glucosaminyl (N-acetyl) transferase 2, I-branching enzyme (I blood group)
226997_at	5.27e-10	1.05e-11	35.1	17.5991	3.35	ADAMTS12	ADAM metallopeptidase with thrombospondin type 1 motif 12
227295_at	5.28e-10	1.05e-11	35.1	17.596	2.92	IKBIP	IKBKB interacting protein
222996_s_at	5.28e-10	1.05e-11	-35	17.5943	-3.52	CXXC5	CXXC finger protein 5
209589_s_at	5.28e-10	1.05e-11	35	17.5936	2.66	EPHB2	EPH receptor B2
229396_at	5.32e-10	1.06e-11	-35	17.5849	-3.36	OVOL1	ovo like transcriptional repressor 1
226638_at	5.37e-10	1.07e-11	35	17.5736	3.03	ARHGAP23	Rho GTPase activating protein 23
216870_x_at	5.37e-10	1.07e-11	35	17.5735	2.62	DLEU2	deleted in lymphocytic leukemia 2 (non-protein coding)
230700_at	5.37e-10	1.07e-11	-35	17.573	-2.85	RTN4RL1	reticulon 4 receptor like 1
232977_x_at	5.37e-10	1.07e-11	-35	17.5709	-3.28	MYH14	myosin, heavy chain 14, non-muscle
201215_at	5.38e-10	1.08e-11	35	17.5686	8.57	PLS3	plastin 3
236026_at	5.44e-10	1.09e-11	-34.9	17.5568	-4.19	GPATCH2	G-patch domain containing 2
214440_at	5.44e-10	1.09e-11	-34.9	17.5557	-2.58	NAT1	N-acetyltransferase 1
241925_x_at	5.44e-10	1.09e-11	34.9	17.5537	3.27	SLC16A7	solute carrier family 16 member 7
224609_at	5.45e-10	1.09e-11	-34.9	17.5521	-2.8	SLC44A2	solute carrier family 44 member 2
223628_at	5.47e-10	1.1e-11	-34.9	17.5468	-2.99	TMEM191A	transmembrane protein 191A (pseudogene)
228693_at	5.51e-10	1.11e-11	34.9	17.5382	3.22	CCDC50	coiled-coil domain containing 50
230130_at	5.53e-10	1.11e-11	-34.8	17.5343	-2.95	SLIT2	slit guidance ligand 2
205596_s_at	5.53e-10	1.12e-11	34.8	17.5322	2.55	SMURF2	SMAD specific E3 ubiquitin protein ligase 2
218847_at	5.57e-10	1.12e-11	34.8	17.5247	4.75	IGF2BP2	insulin like growth factor 2 mRNA binding protein 2
1555007_s_at	5.6e-10	1.13e-11	34.8	17.517	2.85	WDR66	WD repeat domain 66
222857_s_at	5.62e-10	1.14e-11	-34.8	17.5118	-2.77	KCNMB4	potassium calcium-activated channel subfamily M regulatory beta subunit 4
227449_at	5.62e-10	1.14e-11	-34.8	17.5115	-3.6	EPHA4	EPH receptor A4
223449_at	5.62e-10	1.14e-11	-34.8	17.5111	-3.14	SEMA6A	semaphorin 6A
221435_x_at	5.62e-10	1.14e-11	34.8	17.5092	3.27	HYI	hydroxypyruvate isomerase (putative)
206440_at	5.62e-10	1.14e-11	-34.8	17.5089	-2.94	LIN7A	lin-7 homolog A, crumbs cell polarity complex component
230102_at	5.65e-10	1.15e-11	34.7	17.5027	4.08	ETV5	ETS variant 5
228728_at	5.66e-10	1.15e-11	34.7	17.5005	2.94	CPED1	cadherin like and PC-esterase domain containing 1
229053_at	5.68e-10	1.16e-11	-34.7	17.4957	-3.04	SYT17	synaptotagmin 17
209008_x_at	5.7e-10	1.16e-11	-34.7	17.4917	-3.21	KRT8	keratin 8
225906_at	5.7e-10	1.16e-11	-34.7	17.4902	-2.68	GATSL2	GATS protein like 2
235146_at	5.7e-10	1.16e-11	34.7	17.4897	3.18	TMCC3	transmembrane and coiled-coil domain family 3
225803_at	5.7e-10	1.17e-11	34.7	17.4877	2.58	FBXO32	F-box protein 32
219797_at	5.73e-10	1.17e-11	-34.7	17.4823	-2.92	MGAT4A	mannosyl (alpha-1,3-)-glycoprotein beta-1,4-N-acetylglucosaminyltransferase, isozyme A
228708_at	5.73e-10	1.17e-11	-34.7	17.482	-2.75	RAB27B	RAB27B, member RAS oncogene family
235924_at	5.73e-10	1.17e-11	-34.7	17.4811	-3.65	FRK	fyn related Src family tyrosine kinase
222136_x_at	5.73e-10	1.17e-11	-34.7	17.4803	-2.98	ZNF729///ZNF43	zinc finger protein 729///zinc finger protein 43
219340_s_at	5.75e-10	1.18e-11	-34.6	17.4757	-2.87	CLN8	ceroid-lipofuscinosis, neuronal 8
227361_at	5.76e-10	1.18e-11	34.6	17.4717	2.84	HS3ST3B1	heparan sulfate-glucosamine 3-sulfotransferase 3B1
238529_at	5.85e-10	1.2e-11	-34.6	17.4546	-3.38
237268_at	5.86e-10	1.21e-11	-34.6	17.4522	-3.03	DSCAM	DS cell adhesion molecule
213309_at	5.9e-10	1.21e-11	34.5	17.4449	3.51	PLCL2	phospholipase C like 2
223681_s_at	5.9e-10	1.22e-11	-34.5	17.4443	-3.2	PATJ	PATJ, crumbs cell polarity complex component
205122_at	5.9e-10	1.22e-11	34.5	17.4423	2.46	MSANTD3-TMEFF1///TMEFF1	MSANTD3-TMEFF1 readthrough///transmembrane protein with EGF like and two follistatin like domains 1
227059_at	5.91e-10	1.22e-11	34.5	17.4411	3.86	GPC6	glypican 6
226552_at	5.93e-10	1.22e-11	-34.5	17.4365	-2.57	IER5L	immediate early response 5 like
232195_at	6.01e-10	1.24e-11	34.5	17.4211	3.15	GPR158	G protein-coupled receptor 158
212242_at	6.05e-10	1.25e-11	34.4	17.4129	2.55	TUBA4A	tubulin alpha 4a
204454_at	6.05e-10	1.25e-11	-34.4	17.4127	-3.49	LDOC1	leucine zipper down-regulated in cancer 1
216641_s_at	6.05e-10	1.25e-11	-34.4	17.4119	-2.84	LAD1	ladinin 1
213441_x_at	6.07e-10	1.26e-11	-34.4	17.408	-2.62	SPDEF	SAM pointed domain containing ETS transcription factor
214157_at	6.07e-10	1.26e-11	-34.4	17.405	-2.54	GNAS	GNAS complex locus
240827_at	6.07e-10	1.26e-11	-34.4	17.4045	-3.23	GATA3-AS1	GATA3 antisense RNA 1
1558154_at	6.07e-10	1.26e-11	-34.4	17.4036	-3.25
208146_s_at	6.07e-10	1.27e-11	34.4	17.4025	3.53	CPVL	carboxypeptidase, vitellogenic like
202630_at	6.07e-10	1.27e-11	-34.4	17.4019	-3.01	APPBP2	amyloid beta precursor protein binding protein 2
222496_s_at	6.07e-10	1.27e-11	-34.4	17.4015	-2.94	RBM47	RNA binding motif protein 47
221029_s_at	6.12e-10	1.28e-11	34.4	17.3929	3.53	WNT5B	Wnt family member 5B
228412_at	6.12e-10	1.28e-11	-34.3	17.3911	-3.09	LOC643072	uncharacterized LOC643072
239294_at	6.14e-10	1.29e-11	34.3	17.3868	3.68	PIK3CG	phosphatidylinositol-4,5-bisphosphate 3-kinase catalytic subunit gamma
235033_at	6.15e-10	1.29e-11	-34.3	17.3848	-3.18	NPEPL1	aminopeptidase-like 1
203037_s_at	6.18e-10	1.29e-11	-34.3	17.3794	-3.39	MTSS1	metastasis suppressor 1
235599_at	6.18e-10	1.3e-11	34.3	17.3786	3.14	LINC01139	long intergenic non-protein coding RNA 1139
229714_at	6.23e-10	1.31e-11	-34.3	17.368	-2.53	HS6ST3	heparan sulfate 6-O-sulfotransferase 3
227134_at	6.24e-10	1.31e-11	-34.3	17.3655	-3.27	SYTL1	synaptotagmin like 1
215543_s_at	6.33e-10	1.33e-11	-34.2	17.3503	-2.76	LARGE1	LARGE xylosyl- and glucuronyltransferase 1
213589_s_at	6.33e-10	1.33e-11	34.2	17.3499	3.81	B3GNTL1	UDP-GlcNAc:betaGal beta-1,3-N-acetylglucosaminyltransferase-like 1
231726_at	6.34e-10	1.33e-11	-34.2	17.3478	-3.21	PCDHB14	protocadherin beta 14
204779_s_at	6.44e-10	1.36e-11	-34.1	17.3302	-3.01	HOXB7	homeobox B7
233589_x_at	6.44e-10	1.36e-11	34.1	17.3293	2.67	TOR4A	torsin family 4 member A
230793_at	6.45e-10	1.36e-11	-34.1	17.3261	-2.69	CARMIL1	capping protein regulator and myosin 1 linker 1
228359_at	6.45e-10	1.36e-11	34.1	17.325	2.87	UBASH3B	ubiquitin associated and SH3 domain containing B
218404_at	6.47e-10	1.37e-11	-34.1	17.3219	-3.28	SNX10	sorting nexin 10
201721_s_at	6.47e-10	1.37e-11	34.1	17.3207	6.19	LAPTM5	lysosomal protein transmembrane 5
230003_at	6.47e-10	1.37e-11	34.1	17.3206	3.97	SLC16A7	solute carrier family 16 member 7
226988_s_at	6.51e-10	1.38e-11	-34.1	17.3133	-3.31	MYH14	myosin, heavy chain 14, non-muscle
1568763_s_at	6.53e-10	1.39e-11	-34.1	17.3092	-3.25	LOC102724884///LOC728613///PDCD6	uncharacterized LOC102724884///programmed cell death 6 pseudogene///programmed cell death 6
202493_x_at	6.55e-10	1.39e-11	-34.1	17.3036	-2.87	GH1///CSHL1///CSH1	growth hormone 1///chorionic somatomammotropin hormone like 1///chorionic somatomammotropin hormone 1
227584_at	6.55e-10	1.39e-11	34.1	17.303	2.53	NAV1	neuron navigator 1
201105_at	6.59e-10	1.4e-11	34	17.2967	2.67	LGALS1	galectin 1
205248_at	6.61e-10	1.41e-11	-34	17.2924	-3.72	DOPEY2	dopey family member 2
202749_at	6.68e-10	1.43e-11	-34	17.28	-2.62	WRB	tryptophan rich basic protein
221614_s_at	6.72e-10	1.44e-11	34	17.2731	3.29	RPH3AL	rabphilin 3A-like (without C2 domains)
202497_x_at	6.72e-10	1.44e-11	33.9	17.272	3.52	SLC2A3	solute carrier family 2 member 3
233576_at	6.77e-10	1.45e-11	-33.9	17.2639	-3.37	HMGCLL1	3-hydroxymethyl-3-methylglutaryl-CoA lyase like 1
202177_at	6.77e-10	1.45e-11	33.9	17.2635	3.44	GAS6	growth arrest specific 6
1559942_at	6.77e-10	1.45e-11	33.9	17.2629	2.9	MDFIC	MyoD family inhibitor domain containing
235026_at	6.77e-10	1.45e-11	-33.9	17.2618	-2.7	C12orf66	chromosome 12 open reading frame 66
202376_at	6.79e-10	1.46e-11	-33.9	17.2579	-2.61	SERPINA3	serpin family A member 3
204967_at	6.8e-10	1.46e-11	-33.9	17.2557	-3.03	SHROOM2	shroom family member 2
211113_s_at	6.81e-10	1.46e-11	-33.9	17.2535	-2.91	ABCG1	ATP binding cassette subfamily G member 1
1552735_at	6.81e-10	1.46e-11	-33.9	17.2518	-3.04	PCDHGA4	protocadherin gamma subfamily A, 4
227929_at	6.83e-10	1.47e-11	-33.9	17.2473	-4.2	LIN7A	lin-7 homolog A, crumbs cell polarity complex component
225842_at	6.88e-10	1.48e-11	33.8	17.239	4.14	PHLDA1	pleckstrin homology like domain family A member 1
235416_at	6.9e-10	1.49e-11	33.8	17.2352	3.33	LOC643201	centrosomal protein 192kDa pseudogene
225871_at	6.9e-10	1.49e-11	33.8	17.2349	3.36	STEAP2	STEAP2 metalloreductase
212915_at	6.94e-10	1.5e-11	-33.8	17.2286	-3.32	PDZRN3	PDZ domain containing ring finger 3
204637_at	6.96e-10	1.5e-11	-33.8	17.2241	-2.87	CGA	glycoprotein hormones, alpha polypeptide
226353_at	6.96e-10	1.51e-11	-33.8	17.2232	-2.41	SPPL2A	signal peptide peptidase like 2A
221881_s_at	6.96e-10	1.51e-11	33.8	17.222	2.96	CLIC4	chloride intracellular channel 4
207328_at	7.01e-10	1.52e-11	-33.8	17.2146	-3.01	ALOX15	arachidonate 15-lipoxygenase
205965_at	7.03e-10	1.53e-11	-33.7	17.2102	-3.26	BATF	basic leucine zipper ATF-like transcription factor
205204_at	7.05e-10	1.53e-11	-33.7	17.2053	-2.88	NMB	neuromedin B
229228_at	7.05e-10	1.53e-11	33.7	17.2052	3.88	LOC401317///CREB5	uncharacterized LOC401317///cAMP responsive element binding protein 5
227339_at	7.06e-10	1.54e-11	33.7	17.2033	3.06	RGMB	repulsive guidance molecule family member b
225464_at	7.06e-10	1.54e-11	33.7	17.2021	2.52	FRMD6	FERM domain containing 6
202629_at	7.09e-10	1.54e-11	-33.7	17.1972	-2.75	APPBP2	amyloid beta precursor protein binding protein 2
210045_at	7.12e-10	1.55e-11	-33.7	17.1925	-2.75	IDH2	isocitrate dehydrogenase (NADP(+)) 2, mitochondrial
1556308_at	7.19e-10	1.57e-11	-33.6	17.1806	-2.99	PRRT3	proline rich transmembrane protein 3
232244_at	7.21e-10	1.57e-11	-33.6	17.1776	-2.62	KIAA1161	KIAA1161
202931_x_at	7.22e-10	1.58e-11	33.6	17.1751	3.31	BIN1	bridging integrator 1
206693_at	7.25e-10	1.59e-11	33.6	17.1704	3.37	IL7	interleukin 7
203349_s_at	7.26e-10	1.59e-11	33.6	17.1681	4.3	ETV5	ETS variant 5
224657_at	7.28e-10	1.59e-11	33.6	17.1641	2.92	ERRFI1	ERBB receptor feedback inhibitor 1
208885_at	7.29e-10	1.6e-11	33.6	17.1615	2.49	LCP1	lymphocyte cytosolic protein 1
229506_at	7.29e-10	1.6e-11	-33.6	17.1604	-3.61	PPM1L	protein phosphatase, Mg2+/Mn2+ dependent 1L
225739_at	7.3e-10	1.6e-11	-33.6	17.1584	-2.59	RAB11FIP4	RAB11 family interacting protein 4
212488_at	7.3e-10	1.6e-11	33.6	17.1577	3.21	COL5A1	collagen type V alpha 1 chain
204319_s_at	7.33e-10	1.61e-11	33.5	17.1523	2.68	RGS10	regulator of G-protein signaling 10
210448_s_at	7.36e-10	1.62e-11	33.5	17.1473	2.71	P2RX5	purinergic receptor P2X 5
226473_at	7.36e-10	1.62e-11	-33.5	17.1461	-2.43	CBX2	chromobox 2
225894_at	7.42e-10	1.64e-11	-33.5	17.1366	-2.48	SYNPO2	synaptopodin 2
224973_at	7.43e-10	1.64e-11	-33.5	17.1347	-2.66	FAM46A	family with sequence similarity 46 member A
219532_at	7.43e-10	1.64e-11	-33.5	17.1337	-3.04	ELOVL4	ELOVL fatty acid elongase 4
215779_s_at	7.43e-10	1.64e-11	-33.5	17.1334	-2.73	HIST1H2BJ///HIST1H2BG	histone cluster 1, H2bj///histone cluster 1, H2bg
201952_at	7.44e-10	1.65e-11	33.5	17.1313	2.88	ALCAM	activated leukocyte cell adhesion molecule
221523_s_at	7.53e-10	1.67e-11	33.4	17.1173	2.69	RRAGD	Ras related GTP binding D
212956_at	7.56e-10	1.68e-11	-33.4	17.1117	-3.01	TBC1D9	TBC1 domain family member 9
219077_s_at	7.56e-10	1.68e-11	-33.4	17.1113	-3.45	WWOX	WW domain containing oxidoreductase
236313_at	7.58e-10	1.68e-11	-33.4	17.1089	-2.63	CDKN2B	cyclin dependent kinase inhibitor 2B
202887_s_at	7.58e-10	1.69e-11	33.4	17.107	2.92	DDIT4	DNA damage inducible transcript 4
209324_s_at	7.61e-10	1.69e-11	-33.4	17.1016	-2.47	RGS16	regulator of G-protein signaling 16
210695_s_at	7.61e-10	1.69e-11	-33.4	17.1013	-2.51	WWOX	WW domain containing oxidoreductase
227240_at	7.61e-10	1.7e-11	33.4	17.1005	2.85	NGEF	neuronal guanine nucleotide exchange factor
211603_s_at	7.61e-10	1.7e-11	33.4	17.1002	2.5	ETV4	ETS variant 4
243241_at	7.7e-10	1.72e-11	-33.3	17.086	-2.54
214577_at	7.7e-10	1.72e-11	33.3	17.0855	3.01	MAP1B	microtubule associated protein 1B
223960_s_at	7.74e-10	1.73e-11	33.3	17.0793	3.21	CDIP1	cell death inducing p53 target 1
229435_at	7.74e-10	1.73e-11	33.3	17.0788	2.75	GLIS3	GLIS family zinc finger 3
239768_x_at	7.75e-10	1.73e-11	-33.3	17.0772	-3.13	GPATCH2	G-patch domain containing 2
206662_at	7.77e-10	1.74e-11	33.3	17.073	3.55	GLRX	glutaredoxin
235417_at	7.77e-10	1.74e-11	33.3	17.0727	2.91	SPOCD1	SPOC domain containing 1
244743_x_at	7.81e-10	1.75e-11	-33.3	17.0666	-2.94	ZNF138	zinc finger protein 138
221840_at	7.81e-10	1.75e-11	33.3	17.065	2.85	PTPRE	protein tyrosine phosphatase, receptor type E
205316_at	7.84e-10	1.76e-11	-33.2	17.0609	-3.61	SLC15A2	solute carrier family 15 member 2
238778_at	7.9e-10	1.78e-11	-33.2	17.0516	-3.74	MPP7	membrane palmitoylated protein 7
242996_at	7.91e-10	1.78e-11	-33.2	17.0499	-2.88	MTRF1	mitochondrial translational release factor 1
219056_at	7.91e-10	1.78e-11	33.2	17.0478	2.46	RNASEH2B	ribonuclease H2 subunit B
219944_at	7.91e-10	1.78e-11	33.2	17.0476	3.76	CLIP4	CAP-Gly domain containing linker protein family member 4
221593_s_at	7.95e-10	1.79e-11	33.2	17.0423	2.59	RPL31	ribosomal protein L31
224212_s_at	7.95e-10	1.8e-11	-33.2	17.0407	-3.55	PCDHA1///PCDHA2///PCDHA3///PCDHA4///PCDHA5///PCDHA6///PCDHA7///PCDHA8///PCDHA10///PCDHA11///PCDHA12///PCDHA13///PCDHAC1///PCDHAC2///PCDHA9	protocadherin alpha 1///protocadherin alpha 2///protocadherin alpha 3///protocadherin alpha 4///protocadherin alpha 5///protocadherin alpha 6///protocadherin alpha 7///protocadherin alpha 8///protocadherin alpha 10///protocadherin alpha 11///protocadherin alpha 12///protocadherin alpha 13///protocadherin alpha subfamily C, 1///protocadherin alpha subfamily C, 2///protocadherin alpha 9
215707_s_at	7.96e-10	1.8e-11	33.2	17.0388	2.69	PRNP	prion protein
212400_at	7.96e-10	1.8e-11	-33.2	17.0388	-2.52	FAM102A	family with sequence similarity 102 member A
234120_at	8e-10	1.81e-11	-33.2	17.0321	-2.42	LOC105376379	uncharacterized LOC105376379
240557_at	8.02e-10	1.82e-11	-33.1	17.0279	-2.73	TSC22D2	TSC22 domain family member 2
210512_s_at	8.02e-10	1.82e-11	33.1	17.0272	2.49	VEGFA	vascular endothelial growth factor A
218634_at	8.02e-10	1.82e-11	-33.1	17.027	-2.88	PHLDA3	pleckstrin homology like domain family A member 3
219682_s_at	8.03e-10	1.83e-11	-33.1	17.0245	-3.28	TBX3	T-box 3
227811_at	8.12e-10	1.84e-11	-33.1	17.0132	-2.62	FGD3	FYVE, RhoGEF and PH domain containing 3
235182_at	8.14e-10	1.85e-11	33.1	17.0088	2.84	ISM1	isthmin 1, angiogenesis inhibitor
227458_at	8.22e-10	1.87e-11	33	16.9972	4.62	CD274	CD274 molecule
235763_at	8.22e-10	1.87e-11	33	16.9969	3.66	SLC44A5	solute carrier family 44 member 5
208022_s_at	8.37e-10	1.91e-11	33	16.9757	3.29	CDC14B	cell division cycle 14B
227053_at	8.37e-10	1.91e-11	-33	16.9756	-2.71	PACSIN1	protein kinase C and casein kinase substrate in neurons 1
228791_at	8.37e-10	1.91e-11	33	16.9752	2.59	ARPIN	actin-related protein 2/3 complex inhibitor
201984_s_at	8.37e-10	1.91e-11	33	16.9748	2.5	EGFR	epidermal growth factor receptor
200931_s_at	8.37e-10	1.92e-11	33	16.9741	2.41	VCL	vinculin
210550_s_at	8.44e-10	1.93e-11	32.9	16.9645	2.5	RASGRF1	Ras protein specific guanine nucleotide releasing factor 1
231909_x_at	8.44e-10	1.94e-11	32.9	16.9637	3.02	ODF2L	outer dense fiber of sperm tails 2 like
219080_s_at	8.49e-10	1.95e-11	-32.9	16.9578	-2.52	CTPS2	CTP synthase 2
1552269_at	8.49e-10	1.95e-11	-32.9	16.9568	-3.05	SPATA17	spermatogenesis associated 17
233955_x_at	8.5e-10	1.95e-11	-32.9	16.9544	-3.58	CXXC5	CXXC finger protein 5
220324_at	8.5e-10	1.95e-11	32.9	16.9536	3	LINC00472	long intergenic non-protein coding RNA 472
1562048_at	8.51e-10	1.96e-11	32.9	16.9513	3.8	LOC152225	uncharacterized LOC152225
241871_at	8.51e-10	1.96e-11	32.9	16.9511	3.06	CAMK4	calcium/calmodulin dependent protein kinase IV
227722_at	8.54e-10	1.97e-11	32.9	16.9465	3.02	RPS23	ribosomal protein S23
221869_at	8.6e-10	1.98e-11	-32.9	16.9384	-2.76	ZNF512B	zinc finger protein 512B
213172_at	8.68e-10	2e-11	-32.8	16.9281	-3.02	TTC9	tetratricopeptide repeat domain 9
213524_s_at	8.7e-10	2.01e-11	32.8	16.9243	6.93	G0S2	G0/G1 switch 2
204029_at	8.77e-10	2.03e-11	-32.8	16.915	-2.94	CELSR2	cadherin EGF LAG seven-pass G-type receptor 2
222997_s_at	8.79e-10	2.03e-11	-32.8	16.9122	-2.63	MRPS21	mitochondrial ribosomal protein S21
212812_at	8.84e-10	2.05e-11	-32.7	16.9051	-2.72	SERINC5	serine incorporator 5
217053_x_at	8.91e-10	2.07e-11	32.7	16.8964	2.94	ETV1	ETS variant 1
211110_s_at	8.91e-10	2.07e-11	-32.7	16.8961	-3.33	AR	androgen receptor
235692_at	8.93e-10	2.07e-11	32.7	16.893	2.48	SH3KBP1	SH3 domain containing kinase binding protein 1
225481_at	8.98e-10	2.09e-11	32.7	16.8858	2.47	FRMD6	FERM domain containing 6
209782_s_at	9.01e-10	2.09e-11	-32.7	16.8821	-2.97	DBP	D-box binding PAR bZIP transcription factor
228390_at	9.03e-10	2.1e-11	-32.7	16.8784	-3.04	RAB30	RAB30, member RAS oncogene family
208881_x_at	9.06e-10	2.11e-11	-32.6	16.8748	-2.51	IDI1	isopentenyl-diphosphate delta isomerase 1
214519_s_at	9.2e-10	2.14e-11	-32.6	16.8576	-2.75	RLN2	relaxin 2
214880_x_at	9.2e-10	2.15e-11	32.6	16.8563	2.95	CALD1	caldesmon 1
229585_at	9.21e-10	2.15e-11	32.6	16.8545	2.95	ADAMTSL1	ADAMTS like 1
229024_at	9.24e-10	2.16e-11	-32.6	16.8507	-3.32	RNF150	ring finger protein 150
210218_s_at	9.25e-10	2.16e-11	32.6	16.8489	2.77	SP100	SP100 nuclear antigen
213425_at	9.3e-10	2.18e-11	32.5	16.8425	3.05	WNT5A	Wnt family member 5A
218280_x_at	9.38e-10	2.2e-11	-32.5	16.8329	-2.64	HIST2H2AA4///HIST2H2AA3	histone cluster 2, H2aa4///histone cluster 2, H2aa3
226713_at	9.4e-10	2.2e-11	32.5	16.8296	3.49	CCDC50	coiled-coil domain containing 50
217678_at	9.4e-10	2.21e-11	32.5	16.8283	3.05	SLC7A11	solute carrier family 7 member 11
202935_s_at	9.46e-10	2.22e-11	32.5	16.8217	5.7	SOX9	SRY-box 9
231960_at	9.5e-10	2.23e-11	-32.5	16.816	-3.04	BRWD1	bromodomain and WD repeat domain containing 1
225540_at	9.56e-10	2.25e-11	-32.4	16.8083	-2.9	MAP2	microtubule associated protein 2
200951_s_at	9.56e-10	2.25e-11	32.4	16.8078	2.59	CCND2	cyclin D2
224997_x_at	9.56e-10	2.25e-11	-32.4	16.8072	-3.65	MIR675///H19	microRNA 675///H19, imprinted maternally expressed transcript (non-protein coding)
218717_s_at	9.56e-10	2.25e-11	32.4	16.8057	2.96	P3H2	prolyl 3-hydroxylase 2
200743_s_at	9.56e-10	2.25e-11	32.4	16.8053	2.35	TPP1	tripeptidyl peptidase 1
204381_at	9.62e-10	2.27e-11	-32.4	16.7981	-2.43	LRP3	LDL receptor related protein 3
205088_at	9.69e-10	2.29e-11	32.4	16.7894	2.88	MAMLD1	mastermind like domain containing 1
238116_at	9.69e-10	2.29e-11	-32.4	16.7882	-2.98	DYNLRB2	dynein light chain roadblock-type 2
244276_at	9.69e-10	2.29e-11	-32.4	16.7881	-2.6	KLB	klotho beta
204932_at	9.74e-10	2.31e-11	-32.4	16.7822	-2.72	TNFRSF11B	TNF receptor superfamily member 11b
223103_at	9.75e-10	2.31e-11	-32.3	16.7805	-4.69	STARD10	StAR related lipid transfer domain containing 10
204566_at	9.75e-10	2.31e-11	-32.3	16.7788	-2.82	PPM1D	protein phosphatase, Mg2+/Mn2+ dependent 1D
223062_s_at	9.75e-10	2.31e-11	32.3	16.7783	2.56	PSAT1	phosphoserine aminotransferase 1
219620_x_at	9.76e-10	2.32e-11	32.3	16.7771	3.17	TOR4A	torsin family 4 member A
204491_at	9.81e-10	2.33e-11	32.3	16.7707	3.36	PDE4D	phosphodiesterase 4D
224694_at	9.82e-10	2.33e-11	32.3	16.7694	2.74	ANTXR1	anthrax toxin receptor 1
227342_s_at	9.82e-10	2.34e-11	32.3	16.7677	4.57	MYEOV	myeloma overexpressed
219250_s_at	9.85e-10	2.35e-11	-32.3	16.7631	-3.66	FLRT3	fibronectin leucine rich transmembrane protein 3
202201_at	9.85e-10	2.35e-11	-32.3	16.7629	-2.3	BLVRB	biliverdin reductase B
230015_at	9.86e-10	2.35e-11	32.3	16.7619	3.98	PRCD	progressive rod-cone degeneration
228850_s_at	9.86e-10	2.35e-11	-32.3	16.7604	-2.97	SLIT2	slit guidance ligand 2
228904_at	9.89e-10	2.36e-11	32.3	16.7565	3	HOXB3	homeobox B3
224975_at	9.89e-10	2.37e-11	32.3	16.7552	2.64	NFIA	nuclear factor I A
207876_s_at	9.89e-10	2.37e-11	32.3	16.7552	2.75	FLNC	filamin C
207627_s_at	9.91e-10	2.37e-11	32.3	16.7526	3.09	TFCP2	transcription factor CP2
212171_x_at	9.92e-10	2.38e-11	32.2	16.7501	2.39	VEGFA	vascular endothelial growth factor A
209140_x_at	9.93e-10	2.38e-11	32.2	16.7483	2.94	HLA-B	major histocompatibility complex, class I, B
224746_at	1e-09	2.4e-11	-32.2	16.739	-2.53	KIAA1522	KIAA1522
240042_at	1e-09	2.41e-11	-32.2	16.7374	-2.86	FIBCD1	fibrinogen C domain containing 1
225750_at	1e-09	2.41e-11	32.2	16.7367	2.63	ERO1A	endoplasmic reticulum oxidoreductase 1 alpha
229150_at	1.01e-09	2.42e-11	-32.2	16.7319	-3.59
1561633_at	1.01e-09	2.42e-11	32.2	16.7306	2.98	HMGA2	high mobility group AT-hook 2
209598_at	1.01e-09	2.42e-11	32.2	16.7301	3.44	PNMA2	paraneoplastic Ma antigen 2
205083_at	1.01e-09	2.44e-11	32.2	16.724	2.82	AOX1	aldehyde oxidase 1
204983_s_at	1.02e-09	2.45e-11	-32.1	16.7188	-2.72	GPC4	glypican 4
225798_at	1.02e-09	2.45e-11	32.1	16.7185	2.77	JAZF1	JAZF zinc finger 1
235333_at	1.02e-09	2.46e-11	32.1	16.7133	2.78	B4GALT6	beta-1,4-galactosyltransferase 6
223253_at	1.02e-09	2.47e-11	32.1	16.7124	2.44	EPDR1	ependymin related 1
203329_at	1.02e-09	2.47e-11	32.1	16.7084	3.75	PTPRM	protein tyrosine phosphatase, receptor type M
203011_at	1.02e-09	2.48e-11	32.1	16.7079	2.29	IMPA1	inositol monophosphatase 1
203638_s_at	1.03e-09	2.49e-11	-32.1	16.7017	-2.4	FGFR2	fibroblast growth factor receptor 2
220040_x_at	1.03e-09	2.5e-11	32.1	16.6981	2.61	ZC4H2	zinc finger C4H2-type containing
235548_at	1.04e-09	2.51e-11	32.1	16.6928	3	APCDD1L	APC down-regulated 1 like
218346_s_at	1.04e-09	2.52e-11	-32.1	16.6902	-2.32	SESN1	sestrin 1
225078_at	1.04e-09	2.52e-11	-32.1	16.6902	-3.68	EMP2	epithelial membrane protein 2
229824_at	1.04e-09	2.52e-11	32.1	16.6896	3.67	SHC3	SHC adaptor protein 3
230720_at	1.04e-09	2.52e-11	32.1	16.6887	3.21	RNF182	ring finger protein 182
204336_s_at	1.04e-09	2.53e-11	-32	16.6867	-2.5	RGS19	regulator of G-protein signaling 19
238983_at	1.04e-09	2.54e-11	-32	16.6821	-2.9	NSUN7	NOP2/Sun RNA methyltransferase family member 7
204747_at	1.04e-09	2.54e-11	32	16.6802	2.66	IFIT3	interferon induced protein with tetratricopeptide repeats 3
1556242_a_at	1.05e-09	2.56e-11	32	16.6723	2.62	LOC100310756	uncharacterized LOC100310756
212364_at	1.06e-09	2.58e-11	-32	16.6655	-2.4	MYO1B	myosin IB
214469_at	1.06e-09	2.58e-11	-32	16.6641	-3.38	HIST1H2AE	histone cluster 1, H2ae
204214_s_at	1.06e-09	2.59e-11	32	16.6628	2.91	RAB32	RAB32, member RAS oncogene family
207629_s_at	1.06e-09	2.59e-11	32	16.6598	2.71	ARHGEF2	Rho/Rac guanine nucleotide exchange factor 2
207540_s_at	1.06e-09	2.61e-11	-31.9	16.6536	-3.19	SYK	spleen associated tyrosine kinase
219355_at	1.06e-09	2.61e-11	31.9	16.6535	3.85	CXorf57	chromosome X open reading frame 57
210613_s_at	1.06e-09	2.61e-11	-31.9	16.6528	-2.66	SYNGR1	synaptogyrin 1
218951_s_at	1.06e-09	2.61e-11	-31.9	16.6526	-2.73	PLCXD1	phosphatidylinositol specific phospholipase C X domain containing 1
35666_at	1.07e-09	2.63e-11	-31.9	16.6441	-2.38	SEMA3F	semaphorin 3F
1554314_at	1.07e-09	2.64e-11	-31.9	16.6432	-2.58	C6orf141	chromosome 6 open reading frame 141
227966_s_at	1.08e-09	2.65e-11	-31.9	16.6381	-2.49	CCDC74B///CCDC74A	coiled-coil domain containing 74B///coiled-coil domain containing 74A
237086_at	1.08e-09	2.65e-11	-31.9	16.6367	-4.45	FOXA1	forkhead box A1
210757_x_at	1.08e-09	2.67e-11	31.9	16.6278	3.23	LOC101926921///DAB2	uncharacterized LOC101926921///DAB2, clathrin adaptor protein
46142_at	1.08e-09	2.67e-11	-31.9	16.6276	-3	LMF1	lipase maturation factor 1
225796_at	1.09e-09	2.68e-11	31.9	16.6252	2.87	PXK	PX domain containing serine/threonine kinase like
202238_s_at	1.09e-09	2.69e-11	31.8	16.6217	4.16	LOC101928916///NNMT	uncharacterized LOC101928916///nicotinamide N-methyltransferase
202557_at	1.09e-09	2.7e-11	31.8	16.6189	3.02	HSPA13	heat shock protein family A (Hsp70) member 13
220806_x_at	1.1e-09	2.72e-11	-31.8	16.6111	-2.48	GNG13	G protein subunit gamma 13
218292_s_at	1.1e-09	2.72e-11	31.8	16.6106	2.98	PRKAG2	protein kinase AMP-activated non-catalytic subunit gamma 2
239240_at	1.1e-09	2.72e-11	31.8	16.6092	3.21
213009_s_at	1.1e-09	2.73e-11	-31.8	16.6067	-2.74	TRIM37	tripartite motif containing 37
204062_s_at	1.1e-09	2.73e-11	-31.8	16.6047	-3.63	ULK2	unc-51 like autophagy activating kinase 2
226806_s_at	1.1e-09	2.74e-11	31.8	16.6011	2.87	NFIA	nuclear factor I A
219972_s_at	1.11e-09	2.75e-11	31.8	16.599	2.28	PCNX4	pecanex homolog 4 (Drosophila)
219863_at	1.11e-09	2.75e-11	31.8	16.597	3.09	HERC5	HECT and RLD domain containing E3 ubiquitin protein ligase 5
213358_at	1.11e-09	2.76e-11	31.8	16.5966	2.51	MTCL1	microtubule crosslinking factor 1
207836_s_at	1.11e-09	2.76e-11	-31.8	16.5936	-3.31	RBPMS	RNA binding protein with multiple splicing
201560_at	1.12e-09	2.79e-11	31.7	16.582	2.53	CLIC4	chloride intracellular channel 4
225033_at	1.12e-09	2.8e-11	-31.7	16.5806	-2.84	ST3GAL1	ST3 beta-galactoside alpha-2,3-sialyltransferase 1
226599_at	1.12e-09	2.8e-11	-31.7	16.579	-3.37	FHDC1	FH2 domain containing 1
209307_at	1.13e-09	2.81e-11	31.7	16.5755	2.33	SWAP70	SWAP switching B-cell complex 70kDa subunit
231929_at	1.13e-09	2.82e-11	-31.7	16.5738	-2.7	IKZF2	IKAROS family zinc finger 2
209791_at	1.13e-09	2.82e-11	-31.7	16.5728	-2.99	PADI2	peptidyl arginine deiminase 2
220004_at	1.13e-09	2.83e-11	-31.7	16.568	-2.97	DDX43	DEAD-box helicase 43
217892_s_at	1.14e-09	2.85e-11	31.7	16.5609	2.34	LIMA1	LIM domain and actin binding 1
212423_at	1.14e-09	2.85e-11	31.7	16.5608	2.61	ZCCHC24	zinc finger CCHC-type containing 24
223301_s_at	1.15e-09	2.88e-11	31.6	16.5519	2.9	CCDC82	coiled-coil domain containing 82
229390_at	1.15e-09	2.89e-11	31.6	16.5454	3.67	FAM26F	family with sequence similarity 26 member F
209735_at	1.15e-09	2.9e-11	-31.6	16.5448	-3.79	ABCG2	ATP binding cassette subfamily G member 2 (Junior blood group)
219288_at	1.15e-09	2.9e-11	-31.6	16.5425	-2.3	C3orf14	chromosome 3 open reading frame 14
213030_s_at	1.16e-09	2.91e-11	31.6	16.5388	2.7	PLXNA2	plexin A2
1555852_at	1.16e-09	2.92e-11	31.6	16.536	2.65	PSMB8-AS1	PSMB8 antisense RNA 1 (head to head)
211822_s_at	1.16e-09	2.92e-11	31.6	16.5353	2.38	NLRP1	NLR family pyrin domain containing 1
204501_at	1.16e-09	2.93e-11	31.6	16.5314	2.36	NOV	nephroblastoma overexpressed
229072_at	1.17e-09	2.95e-11	-31.5	16.5261	-2.88	RAB30	RAB30, member RAS oncogene family
208792_s_at	1.17e-09	2.95e-11	-31.5	16.5248	-3	CLU	clusterin
235230_at	1.17e-09	2.97e-11	31.5	16.5188	2.79	PLCXD2	phosphatidylinositol specific phospholipase C X domain containing 2
201130_s_at	1.18e-09	2.99e-11	-31.5	16.5112	-4.33	CDH1	cadherin 1
209661_at	1.18e-09	3e-11	31.5	16.5096	2.37	KIFC3	kinesin family member C3
205993_s_at	1.19e-09	3.01e-11	-31.5	16.5053	-2.91	TBX2	T-box 2
228360_at	1.19e-09	3.01e-11	-31.5	16.5047	-2.76	LYPD6B	LY6/PLAUR domain containing 6B
213913_s_at	1.19e-09	3.01e-11	-31.5	16.5045	-3.71	TBC1D30	TBC1 domain family member 30
233825_s_at	1.19e-09	3.02e-11	31.5	16.5023	2.51	CD99L2	CD99 molecule like 2
228766_at	1.19e-09	3.02e-11	-31.5	16.5	-2.62	CD36	CD36 molecule
206085_s_at	1.19e-09	3.03e-11	31.5	16.4971	4.38	CTH	cystathionine gamma-lyase
204595_s_at	1.19e-09	3.04e-11	31.5	16.4961	2.32	STC1	stanniocalcin 1
221031_s_at	1.2e-09	3.05e-11	31.4	16.4927	2.75	APOLD1	apolipoprotein L domain containing 1
227980_at	1.2e-09	3.05e-11	-31.4	16.4917	-2.3	ZNF322	zinc finger protein 322
215785_s_at	1.21e-09	3.08e-11	-31.4	16.4804	-2.84	CYFIP2	cytoplasmic FMR1 interacting protein 2
228931_at	1.21e-09	3.08e-11	-31.4	16.4792	-2.77	COQ4	coenzyme Q4
204063_s_at	1.21e-09	3.1e-11	-31.4	16.4745	-2.66	ULK2	unc-51 like autophagy activating kinase 2
214290_s_at	1.22e-09	3.11e-11	-31.4	16.472	-2.43	HIST2H2AA4///HIST2H2AA3	histone cluster 2, H2aa4///histone cluster 2, H2aa3
1554237_at	1.22e-09	3.12e-11	31.4	16.4687	2.77	SDCCAG8	serologically defined colon cancer antigen 8
206153_at	1.22e-09	3.12e-11	-31.4	16.4659	-3.14	CYP4F11	cytochrome P450 family 4 subfamily F member 11
209755_at	1.22e-09	3.13e-11	31.4	16.464	3.23	NMNAT2	nicotinamide nucleotide adenylyltransferase 2
228027_at	1.22e-09	3.14e-11	-31.4	16.4621	-2.65	ARMCX5-GPRASP2///GPRASP2	ARMCX5-GPRASP2 readthrough///G protein-coupled receptor associated sorting protein 2
209763_at	1.23e-09	3.16e-11	31.3	16.4556	2.86	CHRDL1	chordin like 1
226575_at	1.24e-09	3.17e-11	31.3	16.451	2.44	ZNF462	zinc finger protein 462
202693_s_at	1.24e-09	3.19e-11	31.3	16.4445	2.26	STK17A	serine/threonine kinase 17a
222760_at	1.24e-09	3.19e-11	-31.3	16.4442	-2.62	ZNF703	zinc finger protein 703
228221_at	1.24e-09	3.2e-11	-31.3	16.442	-2.43	SLC44A3	solute carrier family 44 member 3
217061_s_at	1.24e-09	3.2e-11	31.3	16.4399	2.83	ETV1	ETS variant 1
207351_s_at	1.24e-09	3.2e-11	31.3	16.4394	2.47	SH2D2A	SH2 domain containing 2A
214439_x_at	1.25e-09	3.21e-11	31.3	16.4379	3.4	BIN1	bridging integrator 1
205499_at	1.25e-09	3.21e-11	31.3	16.4367	2.87	SRPX2	sushi repeat containing protein, X-linked 2
214051_at	1.25e-09	3.22e-11	31.3	16.4339	3.06	TMSB15B///TMSB15A	thymosin beta 15B///thymosin beta 15a
219562_at	1.25e-09	3.23e-11	-31.3	16.4311	-2.37	RAB26	RAB26, member RAS oncogene family
202626_s_at	1.25e-09	3.23e-11	31.3	16.4305	2.93	LYN	LYN proto-oncogene, Src family tyrosine kinase
205407_at	1.25e-09	3.24e-11	31.2	16.4288	2.78	RECK	reversion inducing cysteine rich protein with kazal motifs
227870_at	1.25e-09	3.24e-11	31.2	16.4279	3.32	IGDCC4	immunoglobulin superfamily DCC subclass member 4
204985_s_at	1.25e-09	3.25e-11	-31.2	16.4264	-3.22	TRAPPC6A	trafficking protein particle complex 6A
243154_at	1.25e-09	3.25e-11	31.2	16.4249	2.79
212510_at	1.25e-09	3.25e-11	-31.2	16.4235	-2.28	GPD1L	glycerol-3-phosphate dehydrogenase 1-like
228949_at	1.26e-09	3.26e-11	31.2	16.421	3.86	WLS	wntless Wnt ligand secretion mediator
236202_at	1.26e-09	3.26e-11	-31.2	16.4207	-2.54
209687_at	1.26e-09	3.28e-11	-31.2	16.4153	-3.68	CXCL12	C-X-C motif chemokine ligand 12
223500_at	1.27e-09	3.29e-11	-31.2	16.412	-2.36	CPLX1	complexin 1
217890_s_at	1.27e-09	3.3e-11	31.2	16.4088	2.69	PARVA	parvin alpha
219594_at	1.27e-09	3.3e-11	31.2	16.4079	3.41	NINJ2	ninjurin 2
202363_at	1.27e-09	3.32e-11	31.2	16.4024	3.13	SPOCK1	sparc/osteonectin, cwcv and kazal-like domains proteoglycan (testican) 1
216033_s_at	1.27e-09	3.32e-11	31.2	16.402	4.3	FYN	FYN proto-oncogene, Src family tyrosine kinase
228333_at	1.28e-09	3.33e-11	31.2	16.3985	2.48	ZEB2	zinc finger E-box binding homeobox 2
227565_at	1.28e-09	3.34e-11	31.2	16.3971	2.34	KLHL5	kelch like family member 5
229963_at	1.28e-09	3.34e-11	-31.1	16.3965	-2.48	BEX5	brain expressed X-linked 5
204688_at	1.28e-09	3.34e-11	31.1	16.3951	2.78	SGCE	sarcoglycan epsilon
205931_s_at	1.28e-09	3.34e-11	31.1	16.3951	3.01	LOC401317///CREB5	uncharacterized LOC401317///cAMP responsive element binding protein 5
202864_s_at	1.28e-09	3.35e-11	31.1	16.3935	2.64	SP100	SP100 nuclear antigen
228570_at	1.28e-09	3.36e-11	-31.1	16.3889	-2.4	BTBD11	BTB domain containing 11
206565_x_at	1.29e-09	3.38e-11	-31.1	16.383	-2.29	SMA4	glucuronidase beta pseudogene
226237_at	1.29e-09	3.39e-11	31.1	16.3808	3.6	COL8A1	collagen type VIII alpha 1 chain
1553229_at	1.29e-09	3.39e-11	-31.1	16.3803	-2.68	ZNF572	zinc finger protein 572
221606_s_at	1.3e-09	3.42e-11	31.1	16.3717	2.62	HMGN5	high mobility group nucleosome binding domain 5
209062_x_at	1.31e-09	3.44e-11	-31.1	16.3663	-2.64	NCOA3	nuclear receptor coactivator 3
1560853_x_at	1.31e-09	3.44e-11	31.1	16.3653	2.83	ZNF826P	zinc finger protein 826, pseudogene
201236_s_at	1.31e-09	3.44e-11	-31.1	16.3649	-3.2	BTG2	BTG anti-proliferation factor 2
202498_s_at	1.31e-09	3.46e-11	31	16.3595	3.22	SLC2A3	solute carrier family 2 member 3
225001_at	1.32e-09	3.48e-11	-31	16.3532	-3.1	RAB3D	RAB3D, member RAS oncogene family
230560_at	1.33e-09	3.5e-11	-31	16.3471	-2.79	STXBP6	syntaxin binding protein 6
212599_at	1.33e-09	3.51e-11	-31	16.3451	-3.02	AUTS2	autism susceptibility candidate 2
224655_at	1.33e-09	3.52e-11	-31	16.3419	-2.26	AK3	adenylate kinase 3
204596_s_at	1.33e-09	3.52e-11	31	16.3409	2.79	STC1	stanniocalcin 1
1554445_at	1.33e-09	3.52e-11	-31	16.3404	-2.36	ZNF85	zinc finger protein 85
224989_at	1.33e-09	3.53e-11	-31	16.3397	-4.02	SMIM14	small integral membrane protein 14
215222_x_at	1.33e-09	3.53e-11	31	16.3374	2.52	MACF1	microtubule-actin crosslinking factor 1
231986_at	1.34e-09	3.54e-11	-31	16.3348	-2.23	RIMS1	regulating synaptic membrane exocytosis 1
226612_at	1.34e-09	3.56e-11	-31	16.3313	-2.86	UBE2QL1	ubiquitin conjugating enzyme E2 Q family like 1
225817_at	1.34e-09	3.56e-11	-30.9	16.3295	-3.13	LOC101930349///LOC101930344///CGNL1	uncharacterized LOC101930349///uncharacterized LOC101930344///cingulin like 1
201422_at	1.34e-09	3.56e-11	-30.9	16.3289	-2.41	IFI30///PIK3R2	IFI30, lysosomal thiol reductase///phosphoinositide-3-kinase regulatory subunit 2
227180_at	1.34e-09	3.57e-11	-30.9	16.3267	-2.73	ELOVL7	ELOVL fatty acid elongase 7
216973_s_at	1.34e-09	3.57e-11	-30.9	16.326	-2.69	HOXB7	homeobox B7
215629_s_at	1.34e-09	3.57e-11	30.9	16.3258	2.5	MIR15A///DLEU2L///DLEU2	microRNA 15a///deleted in lymphocytic leukemia 2-like///deleted in lymphocytic leukemia 2 (non-protein coding)
215411_s_at	1.34e-09	3.58e-11	-30.9	16.3253	-2.27	TRAF3IP2	TRAF3 interacting protein 2
218693_at	1.34e-09	3.58e-11	-30.9	16.324	-2.24	TSPAN15	tetraspanin 15
230360_at	1.35e-09	3.6e-11	-30.9	16.3169	-2.31	GLDN	gliomedin
207992_s_at	1.35e-09	3.61e-11	30.9	16.3139	3.3	AMPD3	adenosine monophosphate deaminase 3
229958_at	1.35e-09	3.61e-11	-30.9	16.3139	-3.44	CLN8	ceroid-lipofuscinosis, neuronal 8
219044_at	1.36e-09	3.63e-11	-30.9	16.3084	-2.28	THNSL2	threonine synthase like 2
208970_s_at	1.36e-09	3.64e-11	30.9	16.3054	2.7	UROD	uroporphyrinogen decarboxylase
231781_s_at	1.36e-09	3.65e-11	30.9	16.3028	2.41	LRRC2	leucine rich repeat containing 2
204989_s_at	1.37e-09	3.67e-11	-30.8	16.2973	-3.05	ITGB4	integrin subunit beta 4
227386_s_at	1.37e-09	3.68e-11	30.8	16.2951	3.86	TMEM200B	transmembrane protein 200B
221953_s_at	1.38e-09	3.69e-11	30.8	16.2914	2.47	MMP24-AS1	MMP24 antisense RNA 1
213156_at	1.38e-09	3.71e-11	30.8	16.2868	3	ZBTB20	zinc finger and BTB domain containing 20
205364_at	1.38e-09	3.72e-11	30.8	16.2852	2.99	ACOX2	acyl-CoA oxidase 2
227708_at	1.38e-09	3.72e-11	30.8	16.2848	2.81	EEF1A1	eukaryotic translation elongation factor 1 alpha 1
220979_s_at	1.38e-09	3.72e-11	30.8	16.2836	3.17	ST6GALNAC5	ST6 N-acetylgalactosaminide alpha-2,6-sialyltransferase 5
229298_at	1.38e-09	3.72e-11	-30.8	16.2826	-2.98	KBTBD7	kelch repeat and BTB domain containing 7
239367_at	1.39e-09	3.75e-11	30.8	16.2742	2.7	BDNF	brain derived neurotrophic factor
212822_at	1.39e-09	3.76e-11	30.8	16.2741	2.56	HEG1	heart development protein with EGF like domains 1
218035_s_at	1.39e-09	3.76e-11	-30.8	16.2724	-3.03	RBM47	RNA binding motif protein 47
211578_s_at	1.4e-09	3.79e-11	-30.7	16.2642	-2.91	RPS6KB1	ribosomal protein S6 kinase B1
225579_at	1.4e-09	3.79e-11	-30.7	16.2633	-2.41	PQLC3	PQ loop repeat containing 3
225062_at	1.4e-09	3.79e-11	30.7	16.2632	2.9	LOC102724951///LOC389831	uncharacterized LOC102724951///uncharacterized LOC389831
234472_at	1.41e-09	3.8e-11	30.7	16.2607	3.61	GALNT13	polypeptide N-acetylgalactosaminyltransferase 13
229978_at	1.41e-09	3.81e-11	-30.7	16.2585	-2.83	SHISA9	shisa family member 9
226736_at	1.41e-09	3.81e-11	-30.7	16.2585	-2.82	CHURC1	churchill domain containing 1
223340_at	1.41e-09	3.81e-11	30.7	16.2584	2.59	ATL1	atlastin GTPase 1
216687_x_at	1.41e-09	3.82e-11	-30.7	16.257	-3.46	UGT2B15	UDP glucuronosyltransferase family 2 member B15
204030_s_at	1.41e-09	3.83e-11	30.7	16.2523	2.38	IQCJ-SCHIP1///SCHIP1	IQCJ-SCHIP1 readthrough///schwannomin interacting protein 1
236263_at	1.41e-09	3.84e-11	-30.7	16.2511	-2.43	SHH	sonic hedgehog
204285_s_at	1.41e-09	3.84e-11	30.7	16.2503	3.37	PMAIP1	phorbol-12-myristate-13-acetate-induced protein 1
203633_at	1.41e-09	3.85e-11	-30.7	16.2489	-2.34	CPT1A	carnitine palmitoyltransferase 1A
218456_at	1.42e-09	3.85e-11	30.7	16.2471	3.18	CAPRIN2	caprin family member 2
210130_s_at	1.43e-09	3.88e-11	-30.7	16.2388	-2.5	TM7SF2	transmembrane 7 superfamily member 2
218952_at	1.43e-09	3.89e-11	-30.7	16.238	-2.53	PCSK1N	proprotein convertase subtilisin/kexin type 1 inhibitor
202368_s_at	1.43e-09	3.9e-11	30.7	16.2353	3.41	TRAM2	translocation associated membrane protein 2
214129_at	1.43e-09	3.9e-11	-30.7	16.2346	-2.33	LOC101930416///LOC101929792///LOC100996724///PDE4DIP	myomegalin-like///uncharacterized LOC101929792///phosphodiesterase 4D interacting protein-like///phosphodiesterase 4D interacting protein
229285_at	1.43e-09	3.91e-11	-30.7	16.2319	-2.39	RNASEL	ribonuclease L
232069_at	1.43e-09	3.91e-11	-30.7	16.2311	-2.35	KIF26A	kinesin family member 26A
37028_at	1.44e-09	3.93e-11	30.6	16.2263	2.61	PPP1R15A	protein phosphatase 1 regulatory subunit 15A
211506_s_at	1.45e-09	3.98e-11	30.6	16.2146	5.44	CXCL8	C-X-C motif chemokine ligand 8
208920_at	1.45e-09	3.98e-11	30.6	16.2136	2.62	SRI	sorcin
218651_s_at	1.46e-09	3.99e-11	30.6	16.2109	2.94	LARP6	La ribonucleoprotein domain family member 6
213106_at	1.46e-09	4.01e-11	-30.6	16.2054	-2.23	ATP8A1	ATPase phospholipid transporting 8A1
203936_s_at	1.47e-09	4.03e-11	-30.6	16.2005	-2.38	MMP9	matrix metallopeptidase 9
204220_at	1.47e-09	4.04e-11	30.5	16.1965	2.71	GMFG	glia maturation factor gamma
209061_at	1.48e-09	4.06e-11	-30.5	16.1927	-3.29	NCOA3	nuclear receptor coactivator 3
225056_at	1.49e-09	4.1e-11	-30.5	16.182	-2.53	SIPA1L2	signal induced proliferation associated 1 like 2
209325_s_at	1.5e-09	4.12e-11	-30.5	16.1772	-2.56	RGS16	regulator of G-protein signaling 16
229307_at	1.5e-09	4.12e-11	30.5	16.1768	3.52	ANKRD28	ankyrin repeat domain 28
230769_at	1.5e-09	4.13e-11	-30.5	16.1756	-2.6	DENND2C	DENN domain containing 2C
213702_x_at	1.5e-09	4.14e-11	-30.5	16.1715	-2.57	ASAH1	N-acylsphingosine amidohydrolase 1
201147_s_at	1.52e-09	4.19e-11	-30.4	16.1591	-2.62	TIMP3	TIMP metallopeptidase inhibitor 3
209285_s_at	1.52e-09	4.2e-11	30.4	16.158	2.71	FAM208A	family with sequence similarity 208 member A
228737_at	1.52e-09	4.2e-11	30.4	16.1563	2.81	TOX2	TOX high mobility group box family member 2
201641_at	1.52e-09	4.2e-11	30.4	16.1562	2.4	BST2	bone marrow stromal cell antigen 2
236225_at	1.52e-09	4.22e-11	-30.4	16.1528	-2.4	GGT6	gamma-glutamyltransferase 6
1570445_a_at	1.52e-09	4.22e-11	30.4	16.1518	4.17	LOC643201	centrosomal protein 192kDa pseudogene
206432_at	1.52e-09	4.22e-11	30.4	16.1514	3.26	HAS2	hyaluronan synthase 2
227796_at	1.52e-09	4.23e-11	-30.4	16.151	-2.55	ZFP62	ZFP62 zinc finger protein
210980_s_at	1.53e-09	4.25e-11	-30.4	16.1454	-2.47	ASAH1	N-acylsphingosine amidohydrolase 1
207358_x_at	1.54e-09	4.27e-11	30.4	16.1404	2.42	MACF1	microtubule-actin crosslinking factor 1
242338_at	1.54e-09	4.27e-11	-30.4	16.1394	-2.81	TMEM64	transmembrane protein 64
209849_s_at	1.54e-09	4.27e-11	-30.4	16.1393	-2.93	RAD51C	RAD51 paralog C
227657_at	1.54e-09	4.28e-11	-30.4	16.1375	-2.67	RNF150	ring finger protein 150
205193_at	1.55e-09	4.31e-11	30.4	16.1311	3.27	MAFF	MAF bZIP transcription factor F
236565_s_at	1.55e-09	4.31e-11	30.4	16.1306	2.56	LARP6	La ribonucleoprotein domain family member 6
1552575_a_at	1.56e-09	4.34e-11	-30.3	16.1234	-2.86	C6orf141	chromosome 6 open reading frame 141
200958_s_at	1.56e-09	4.35e-11	30.3	16.1208	2.18	SDCBP	syndecan binding protein
203637_s_at	1.57e-09	4.37e-11	30.3	16.1159	2.76	MID1	midline 1
244881_at	1.57e-09	4.38e-11	30.3	16.1131	2.25	LMLN	leishmanolysin like peptidase
226777_at	1.57e-09	4.38e-11	30.3	16.1127	2.66	ADAM12	ADAM metallopeptidase domain 12
242888_at	1.57e-09	4.39e-11	30.3	16.1101	2.79	PRRT3-AS1	PRRT3 antisense RNA 1
212543_at	1.58e-09	4.41e-11	-30.3	16.1057	-2.59	AIM1	absent in melanoma 1
222817_at	1.59e-09	4.44e-11	-30.3	16.0986	-2.8	HSD3B7	hydroxy-delta-5-steroid dehydrogenase, 3 beta- and steroid delta-isomerase 7
224916_at	1.59e-09	4.45e-11	30.3	16.0974	2.85	TMEM173	transmembrane protein 173
203641_s_at	1.59e-09	4.46e-11	-30.2	16.0949	-2.64	COBLL1	cordon-bleu WH2 repeat protein like 1
205383_s_at	1.59e-09	4.46e-11	30.2	16.0941	2.75	ZBTB20	zinc finger and BTB domain containing 20
201968_s_at	1.59e-09	4.46e-11	30.2	16.0941	2.18	PGM1	phosphoglucomutase 1
231776_at	1.59e-09	4.46e-11	-30.2	16.094	-2.45	EOMES	eomesodermin
206385_s_at	1.59e-09	4.47e-11	-30.2	16.0929	-2.76	ANK3	ankyrin 3, node of Ranvier (ankyrin G)
209030_s_at	1.6e-09	4.5e-11	-30.2	16.0843	-2.57	CADM1	cell adhesion molecule 1
229331_at	1.61e-09	4.52e-11	-30.2	16.0807	-2.79	SPATA18	spermatogenesis associated 18
230935_at	1.61e-09	4.53e-11	-30.2	16.079	-2.58	HAGLROS	HAGLR opposite strand (non-protein coding)
206233_at	1.61e-09	4.53e-11	30.2	16.0782	3.13	B4GALT6	beta-1,4-galactosyltransferase 6
206023_at	1.61e-09	4.53e-11	30.2	16.0779	2.15	NMU	neuromedin U
201300_s_at	1.61e-09	4.54e-11	30.2	16.0766	2.23	PRNP	prion protein
202597_at	1.61e-09	4.54e-11	-30.2	16.0752	-2.58	IRF6	interferon regulatory factor 6
224976_at	1.61e-09	4.56e-11	30.2	16.0712	2.67	NFIA	nuclear factor I A
203634_s_at	1.61e-09	4.56e-11	-30.2	16.0707	-2.59	CPT1A	carnitine palmitoyltransferase 1A
224970_at	1.61e-09	4.57e-11	30.2	16.07	2.55	NFIA	nuclear factor I A
223524_s_at	1.61e-09	4.57e-11	30.2	16.0691	2.39	TMEM108	transmembrane protein 108
204297_at	1.62e-09	4.57e-11	30.2	16.0682	2.22	PIK3C3	phosphatidylinositol 3-kinase catalytic subunit type 3
228033_at	1.62e-09	4.6e-11	30.1	16.062	2.2	E2F7	E2F transcription factor 7
236038_at	1.62e-09	4.6e-11	-30.1	16.0612	-3.21	RNF150	ring finger protein 150
238805_at	1.63e-09	4.63e-11	-30.1	16.0543	-3.29	HSPB2-C11orf52///C11orf52///HSPB2	HSPB2-C11orf52 readthrough (NMD candidate)///chromosome 11 open reading frame 52///heat shock protein family B (small) member 2
230330_at	1.64e-09	4.64e-11	-30.1	16.0523	-2.82	PPM1D	protein phosphatase, Mg2+/Mn2+ dependent 1D
220615_s_at	1.64e-09	4.64e-11	-30.1	16.0519	-2.88	FAR2	fatty acyl-CoA reductase 2
205289_at	1.64e-09	4.66e-11	30.1	16.048	2.95	BMP2	bone morphogenetic protein 2
1568838_at	1.64e-09	4.67e-11	-30.1	16.0457	-3.37	WASIR2	WASH and IL9R antisense RNA 2
206572_x_at	1.65e-09	4.7e-11	-30.1	16.0394	-2.77	ZNF85	zinc finger protein 85
237321_at	1.67e-09	4.76e-11	30	16.027	2.88	MIR3681HG	MIR3681 host gene
232054_at	1.68e-09	4.79e-11	30	16.0203	2.37	LOC101926951///PCDH20	uncharacterized LOC101926951///protocadherin 20
210754_s_at	1.69e-09	4.83e-11	30	16.0118	3.04	LYN	LYN proto-oncogene, Src family tyrosine kinase
217165_x_at	1.69e-09	4.83e-11	30	16.0115	2.24	MT1F	metallothionein 1F
1555201_a_at	1.69e-09	4.84e-11	-30	16.0095	-2.47	RMND1	required for meiotic nuclear division 1 homolog
215407_s_at	1.7e-09	4.86e-11	-30	16.0038	-2.53	ASTN2	astrotactin 2
201739_at	1.71e-09	4.9e-11	30	15.9961	2.99	SGK1	serum/glucocorticoid regulated kinase 1
212063_at	1.72e-09	4.91e-11	29.9	15.9931	2.28	CD44	CD44 molecule (Indian blood group)
210040_at	1.72e-09	4.93e-11	-29.9	15.9896	-2.88	SLC12A5	solute carrier family 12 member 5
1568617_a_at	1.72e-09	4.93e-11	-29.9	15.9886	-3.17	CAMSAP3	calmodulin regulated spectrin associated protein family member 3
240027_at	1.72e-09	4.93e-11	-29.9	15.9886	-2.18	LIN7A	lin-7 homolog A, crumbs cell polarity complex component
243619_at	1.73e-09	4.95e-11	29.9	15.9849	2.38	FGFR1OP2	FGFR1 oncogene partner 2
239536_at	1.73e-09	4.96e-11	-29.9	15.9836	-3.35
226846_at	1.73e-09	4.96e-11	29.9	15.9833	3.48	PHYHD1	phytanoyl-CoA dioxygenase domain containing 1
1557135_at	1.73e-09	4.97e-11	-29.9	15.9819	-2.32
204789_at	1.73e-09	4.97e-11	29.9	15.9801	3.05	FMNL1	formin like 1
236745_at	1.73e-09	4.98e-11	-29.9	15.9796	-2.69	CCDC78	coiled-coil domain containing 78
243413_at	1.73e-09	4.99e-11	-29.9	15.977	-2.52	TTC30B	tetratricopeptide repeat domain 30B
226811_at	1.73e-09	4.99e-11	-29.9	15.9768	-2.34	FAM46C	family with sequence similarity 46 member C
206289_at	1.73e-09	4.99e-11	-29.9	15.9765	-2.36	HOXA4	homeobox A4
205234_at	1.73e-09	5e-11	-29.9	15.9753	-2.67	SLC16A4	solute carrier family 16 member 4
215771_x_at	1.74e-09	5.02e-11	-29.9	15.9715	-3.09	RET	ret proto-oncogene
221766_s_at	1.74e-09	5.02e-11	-29.9	15.9697	-2.57	FAM46A	family with sequence similarity 46 member A
231769_at	1.75e-09	5.05e-11	-29.9	15.9648	-2.86	FBXO6	F-box protein 6
204770_at	1.76e-09	5.09e-11	29.8	15.9563	2.7	TAP2	transporter 2, ATP binding cassette subfamily B member
218489_s_at	1.76e-09	5.09e-11	-29.8	15.9554	-2.85	ALAD	aminolevulinate dehydratase
227452_at	1.76e-09	5.1e-11	29.8	15.9536	3.13	LINC00673///LINC00511	long intergenic non-protein coding RNA 673///long intergenic non-protein coding RNA 511
205547_s_at	1.77e-09	5.13e-11	29.8	15.9471	2.45	TAGLN	transgelin
211484_s_at	1.78e-09	5.15e-11	-29.8	15.9444	-2.54	DSCAM	DS cell adhesion molecule
227489_at	1.78e-09	5.16e-11	29.8	15.9424	2.23	SMURF2	SMAD specific E3 ubiquitin protein ligase 2
219078_at	1.78e-09	5.16e-11	-29.8	15.9422	-2.62	GPATCH2	G-patch domain containing 2
207267_s_at	1.78e-09	5.17e-11	-29.8	15.94	-2.28	RIPPLY3	ripply transcriptional repressor 3
229657_at	1.78e-09	5.19e-11	-29.8	15.9365	-2.36	THRB	thyroid hormone receptor beta
1560579_s_at	1.79e-09	5.19e-11	29.8	15.9354	2.87	SLC16A1-AS1	SLC16A1 antisense RNA 1
219370_at	1.79e-09	5.2e-11	-29.8	15.9345	-3.14	RPRM	reprimo, TP53 dependent G2 arrest mediator candidate
203234_at	1.79e-09	5.22e-11	29.8	15.93	2.72	UPP1	uridine phosphorylase 1
202421_at	1.8e-09	5.24e-11	-29.8	15.926	-2.51	IGSF3	immunoglobulin superfamily member 3
205207_at	1.82e-09	5.29e-11	29.7	15.9152	3.4	IL6	interleukin 6
1568764_x_at	1.83e-09	5.33e-11	-29.7	15.9078	-3.04	LOC728613///PDCD6	programmed cell death 6 pseudogene///programmed cell death 6
239847_at	1.84e-09	5.36e-11	-29.7	15.9014	-2.18
224156_x_at	1.84e-09	5.37e-11	-29.7	15.9009	-2.88	IL17RB	interleukin 17 receptor B
229485_x_at	1.84e-09	5.37e-11	29.7	15.9002	2.56	SHISA3	shisa family member 3
224508_at	1.84e-09	5.38e-11	29.7	15.8986	2.63	MGC12916	uncharacterized protein MGC12916
205174_s_at	1.85e-09	5.4e-11	-29.7	15.8937	-2.72	QPCT	glutaminyl-peptide cyclotransferase
1568812_at	1.85e-09	5.42e-11	29.6	15.8912	2.59	LOC100507140	uncharacterized LOC100507140
219136_s_at	1.86e-09	5.44e-11	-29.6	15.8867	-2.55	LMF1	lipase maturation factor 1
223434_at	1.86e-09	5.46e-11	29.6	15.8822	2.67	GBP3	guanylate binding protein 3
225564_at	1.87e-09	5.49e-11	-29.6	15.876	-2.39	SPATA13	spermatogenesis associated 13
1567224_at	1.87e-09	5.5e-11	29.6	15.8755	2.75	HMGA2	high mobility group AT-hook 2
211739_x_at	1.88e-09	5.52e-11	-29.6	15.8714	-3.07	GH1///CSHL1///CSH2///CSH1	growth hormone 1///chorionic somatomammotropin hormone like 1///chorionic somatomammotropin hormone 2///chorionic somatomammotropin hormone 1
204920_at	1.88e-09	5.53e-11	29.6	15.8693	3.28	CPS1	carbamoyl-phosphate synthase 1
208373_s_at	1.88e-09	5.53e-11	-29.6	15.8686	-2.41	P2RY6	pyrimidinergic receptor P2Y6
1569727_at	1.9e-09	5.58e-11	29.6	15.8602	3.25	LOC101927701	uncharacterized LOC101927701
208790_s_at	1.9e-09	5.59e-11	29.6	15.8574	4.77	PTRF	polymerase I and transcript release factor
214053_at	1.91e-09	5.64e-11	-29.5	15.8487	-2.5	ERBB4	erb-b2 receptor tyrosine kinase 4
205414_s_at	1.93e-09	5.7e-11	-29.5	15.837	-2.33	ARHGAP44	Rho GTPase activating protein 44
240218_at	1.94e-09	5.72e-11	-29.5	15.8343	-3.02	DSCAM	DS cell adhesion molecule
239065_at	1.94e-09	5.72e-11	-29.5	15.8332	-2.14	DNAJC22	DnaJ heat shock protein family (Hsp40) member C22
222455_s_at	1.94e-09	5.73e-11	29.5	15.8318	2.32	PARVA	parvin alpha
225822_at	1.95e-09	5.76e-11	-29.5	15.8274	-3.49	TMEM125	transmembrane protein 125
218553_s_at	1.95e-09	5.77e-11	-29.5	15.8252	-2.64	KCTD15	potassium channel tetramerization domain containing 15
205593_s_at	1.97e-09	5.82e-11	-29.4	15.8159	-2.16	PDE9A	phosphodiesterase 9A
219737_s_at	1.97e-09	5.84e-11	-29.4	15.8126	-2.98	PCDH9	protocadherin 9
228560_at	1.97e-09	5.85e-11	-29.4	15.8103	-2.44	CHDH	choline dehydrogenase
218924_s_at	1.98e-09	5.87e-11	29.4	15.8062	2.26	CTBS	chitobiase
223286_at	1.98e-09	5.88e-11	29.4	15.8055	2.35	ELP5	elongator acetyltransferase complex subunit 5
211953_s_at	1.98e-09	5.89e-11	29.4	15.8039	2.24	IPO5	importin 5
220663_at	1.99e-09	5.9e-11	29.4	15.8012	4.09	IL1RAPL1	interleukin 1 receptor accessory protein like 1
235205_at	1.99e-09	5.91e-11	29.4	15.7999	2.66	OXR1	oxidation resistance 1
236281_x_at	1.99e-09	5.93e-11	29.4	15.7967	2.66	HTR7	5-hydroxytryptamine receptor 7
219722_s_at	1.99e-09	5.93e-11	-29.4	15.7956	-3.26	GDPD3	glycerophosphodiester phosphodiesterase domain containing 3
201250_s_at	2.02e-09	6.02e-11	29.3	15.7798	2.3	SLC2A1	solute carrier family 2 member 1
215321_at	2.04e-09	6.09e-11	-29.3	15.769	-2.44	RUNDC3B	RUN domain containing 3B
209607_x_at	2.04e-09	6.09e-11	-29.3	15.7677	-2.88	SLX1B-SULT1A4///SLX1A-SULT1A3///SULT1A4///SULT1A3	SLX1B-SULT1A4 readthrough (NMD candidate)///SLX1A-SULT1A3 readthrough (NMD candidate)///sulfotransferase family 1A member 4///sulfotransferase family 1A member 3
40665_at	2.06e-09	6.14e-11	29.3	15.7593	2.44	FMO3	flavin containing monooxygenase 3
225972_at	2.08e-09	6.19e-11	-29.2	15.7503	-2.45	TMEM64	transmembrane protein 64
218284_at	2.08e-09	6.21e-11	29.2	15.7469	2.3	SMAD3	SMAD family member 3
226001_at	2.08e-09	6.23e-11	29.2	15.7451	2.09	KLHL5	kelch like family member 5
220177_s_at	2.08e-09	6.23e-11	-29.2	15.7439	-2.91	TMPRSS3	transmembrane protease, serine 3
204171_at	2.1e-09	6.28e-11	-29.2	15.7368	-2.46	RPS6KB1	ribosomal protein S6 kinase B1
242919_at	2.1e-09	6.28e-11	-29.2	15.7352	-2.55	ZNF253	zinc finger protein 253
207142_at	2.11e-09	6.31e-11	-29.2	15.7305	-2.82	KCNJ3	potassium voltage-gated channel subfamily J member 3
1552766_at	2.11e-09	6.32e-11	-29.2	15.7291	-2.96	HS6ST2	heparan sulfate 6-O-sulfotransferase 2
226847_at	2.11e-09	6.34e-11	29.2	15.7268	2.94	FST	follistatin
221027_s_at	2.12e-09	6.35e-11	-29.2	15.7237	-2.45	PLA2G12A	phospholipase A2 group XIIA
210026_s_at	2.12e-09	6.37e-11	29.2	15.7211	2.35	CARD10	caspase recruitment domain family member 10
227522_at	2.12e-09	6.38e-11	-29.2	15.7196	-2.37	CMBL	carboxymethylenebutenolidase homolog
225496_s_at	2.12e-09	6.39e-11	-29.2	15.7183	-5.42	SYTL2	synaptotagmin like 2
204933_s_at	2.12e-09	6.39e-11	-29.2	15.7174	-2.26	TNFRSF11B	TNF receptor superfamily member 11b
211809_x_at	2.13e-09	6.41e-11	29.1	15.7151	2.94	COL13A1	collagen type XIII alpha 1 chain
242439_s_at	2.14e-09	6.44e-11	29.1	15.7089	2.32	ASXL1	additional sex combs like 1, transcriptional regulator
203282_at	2.14e-09	6.45e-11	29.1	15.7085	2.15	GBE1	glucan (1,4-alpha-), branching enzyme 1
229759_s_at	2.14e-09	6.45e-11	29.1	15.7074	3.02	VEPH1	ventricular zone expressed PH domain containing 1
236513_at	2.14e-09	6.46e-11	29.1	15.7061	2.62	PRELID2	PRELI domain containing 2
237160_at	2.14e-09	6.48e-11	-29.1	15.7038	-2.72	CCDC83	coiled-coil domain containing 83
216236_s_at	2.15e-09	6.48e-11	29.1	15.7027	3.25	SLC2A14///SLC2A3	solute carrier family 2 member 14///solute carrier family 2 member 3
235109_at	2.15e-09	6.51e-11	29.1	15.6987	2.35	ZBED3	zinc finger BED-type containing 3
210612_s_at	2.15e-09	6.51e-11	29.1	15.6986	2.83	SYNJ2	synaptojanin 2
201951_at	2.15e-09	6.51e-11	29.1	15.6981	3.05	ALCAM	activated leukocyte cell adhesion molecule
219228_at	2.16e-09	6.55e-11	29.1	15.6912	2.81	ZNF331	zinc finger protein 331
222457_s_at	2.18e-09	6.61e-11	29.1	15.6822	3.55	LIMA1	LIM domain and actin binding 1
243755_at	2.18e-09	6.61e-11	-29.1	15.6815	-2.47	PRLR	prolactin receptor
205741_s_at	2.18e-09	6.62e-11	-29	15.6814	-2.21	DTNA	dystrobrevin alpha
226885_at	2.18e-09	6.62e-11	29	15.6811	2.53	RNF217	ring finger protein 217
216375_s_at	2.18e-09	6.62e-11	29	15.6804	2.8	ETV5	ETS variant 5
201811_x_at	2.2e-09	6.68e-11	-29	15.6705	-2.24	SH3BP5	SH3 domain binding protein 5
220329_s_at	2.21e-09	6.72e-11	-29	15.6653	-3.07	RMND1	required for meiotic nuclear division 1 homolog
228772_at	2.21e-09	6.74e-11	29	15.6623	3.01	HNMT	histamine N-methyltransferase
208546_x_at	2.21e-09	6.74e-11	-29	15.662	-2.52	HIST1H2BH	histone cluster 1, H2bh
210675_s_at	2.22e-09	6.76e-11	29	15.6593	2.41	PTPRR	protein tyrosine phosphatase, receptor type R
218546_at	2.22e-09	6.78e-11	-29	15.656	-2.87	C1orf115	chromosome 1 open reading frame 115
207419_s_at	2.22e-09	6.79e-11	29	15.6544	4.81	RAC2	ras-related C3 botulinum toxin substrate 2 (rho family, small GTP binding protein Rac2)
206128_at	2.23e-09	6.82e-11	-29	15.6499	-2.58	ADRA2C	adrenoceptor alpha 2C
204682_at	2.24e-09	6.84e-11	29	15.6462	2.57	LTBP2	latent transforming growth factor beta binding protein 2
209784_s_at	2.24e-09	6.84e-11	-28.9	15.6457	-2.73	JAG2	jagged 2
223335_at	2.29e-09	7.01e-11	28.9	15.6209	2.14	TMEM69	transmembrane protein 69
205774_at	2.3e-09	7.03e-11	-28.9	15.6181	-2.45	F12	coagulation factor XII
207122_x_at	2.3e-09	7.04e-11	-28.9	15.6163	-2.21	SULT1A2	sulfotransferase family 1A member 2
232020_at	2.3e-09	7.05e-11	28.9	15.6153	2.46	SMURF2	SMAD specific E3 ubiquitin protein ligase 2
219517_at	2.3e-09	7.05e-11	-28.9	15.6139	-2.45	ELL3	elongation factor for RNA polymerase II 3
215313_x_at	2.3e-09	7.05e-11	28.9	15.6138	2.32	HLA-A	major histocompatibility complex, class I, A
238990_x_at	2.32e-09	7.11e-11	28.8	15.6054	2.68	TRIM61	tripartite motif containing 61
201425_at	2.32e-09	7.12e-11	28.8	15.6046	2.99	ALDH2	aldehyde dehydrogenase 2 family (mitochondrial)
209988_s_at	2.33e-09	7.16e-11	-28.8	15.5976	-3.19	ASCL1	achaete-scute family bHLH transcription factor 1
40093_at	2.35e-09	7.21e-11	-28.8	15.5909	-2.42	BCAM	basal cell adhesion molecule (Lutheran blood group)
205798_at	2.35e-09	7.22e-11	28.8	15.5893	3.51	IL7R	interleukin 7 receptor
206683_at	2.35e-09	7.22e-11	-28.8	15.5891	-3.57	ZNF165	zinc finger protein 165
232617_at	2.37e-09	7.29e-11	28.8	15.5787	2.43	CTSS	cathepsin S
222537_s_at	2.37e-09	7.31e-11	-28.8	15.5765	-2.39	CDC42SE1	CDC42 small effector 1
215177_s_at	2.38e-09	7.33e-11	28.7	15.573	3.09	ITGA6	integrin subunit alpha 6
218094_s_at	2.38e-09	7.34e-11	28.7	15.5721	2.44	SYS1-DBNDD2///SYS1///DBNDD2	SYS1-DBNDD2 readthrough (NMD candidate)///Sys1 golgi trafficking protein///dysbindin domain containing 2
226707_at	2.38e-09	7.35e-11	-28.7	15.5706	-2.47	NAPRT	nicotinate phosphoribosyltransferase
1552721_a_at	2.41e-09	7.43e-11	28.7	15.5588	2.05	FGF1	fibroblast growth factor 1
222981_s_at	2.41e-09	7.44e-11	-28.7	15.5585	-2.15	RAB10	RAB10, member RAS oncogene family
241776_at	2.41e-09	7.46e-11	-28.7	15.5556	-2.41
218640_s_at	2.41e-09	7.46e-11	-28.7	15.5548	-2.11	PLEKHF2	pleckstrin homology and FYVE domain containing 2
207850_at	2.41e-09	7.47e-11	28.7	15.5542	3.59	CXCL3	C-X-C motif chemokine ligand 3
225021_at	2.41e-09	7.47e-11	28.7	15.5532	3.89	ZNF532	zinc finger protein 532
206102_at	2.41e-09	7.48e-11	-28.7	15.5521	-2.35	GINS1	GINS complex subunit 1
232271_at	2.41e-09	7.49e-11	28.7	15.5515	2.76	HNF4G	hepatocyte nuclear factor 4 gamma
202388_at	2.41e-09	7.49e-11	28.7	15.5508	3.42	RGS2	regulator of G-protein signaling 2
223533_at	2.42e-09	7.52e-11	28.7	15.5464	2.3	LOC101927933///LRRC8C	uncharacterized LOC101927933///leucine rich repeat containing 8 family member C
237675_at	2.43e-09	7.55e-11	-28.7	15.5429	-2.5	LINC01351	long intergenic non-protein coding RNA 1351
204975_at	2.43e-09	7.56e-11	-28.7	15.5409	-3.11	EMP2	epithelial membrane protein 2
231907_at	2.43e-09	7.57e-11	28.7	15.5394	2.56	ABL2	ABL proto-oncogene 2, non-receptor tyrosine kinase
1555989_at	2.44e-09	7.59e-11	-28.6	15.5373	-2.47	DAAM1	dishevelled associated activator of morphogenesis 1
227272_at	2.45e-09	7.62e-11	28.6	15.5324	4.11	C15orf52	chromosome 15 open reading frame 52
1554588_a_at	2.45e-09	7.65e-11	-28.6	15.5294	-2.51	TTC30B	tetratricopeptide repeat domain 30B
228297_at	2.45e-09	7.65e-11	28.6	15.5282	7.2	CNN3	calponin 3
213704_at	2.46e-09	7.68e-11	28.6	15.5246	2.37	SNORD45C///SNORD45A///SNORD45B///RABGGTB	small nucleolar RNA, C/D box 45C///small nucleolar RNA, C/D box 45A///small nucleolar RNA, C/D box 45B///Rab geranylgeranyltransferase beta subunit
215058_at	2.47e-09	7.71e-11	28.6	15.521	3.19	DENND5B	DENN domain containing 5B
213035_at	2.47e-09	7.71e-11	28.6	15.5205	2.25	ANKRD28	ankyrin repeat domain 28
236615_at	2.47e-09	7.73e-11	28.6	15.5178	2.43
217047_s_at	2.48e-09	7.76e-11	28.6	15.5134	2.36	FAM13A	family with sequence similarity 13 member A
202643_s_at	2.48e-09	7.76e-11	28.6	15.5132	2.53	TNFAIP3	TNF alpha induced protein 3
227088_at	2.49e-09	7.79e-11	-28.6	15.5103	-2.64	PDE5A	phosphodiesterase 5A
1556409_a_at	2.49e-09	7.79e-11	-28.6	15.51	-2.35
238965_at	2.49e-09	7.81e-11	-28.6	15.5071	-2.42	C21orf2	chromosome 21 open reading frame 2
209555_s_at	2.49e-09	7.81e-11	-28.6	15.5069	-2.6	CD36	CD36 molecule
206698_at	2.49e-09	7.82e-11	28.6	15.5059	2.62	XK	X-linked Kx blood group
223275_at	2.49e-09	7.82e-11	-28.6	15.5054	-2.3	PRMT6	protein arginine methyltransferase 6
223373_s_at	2.5e-09	7.85e-11	-28.5	15.5011	-2.41	PLA2G12A	phospholipase A2 group XIIA
239108_at	2.51e-09	7.88e-11	-28.5	15.4978	-2.29	FAR2	fatty acyl-CoA reductase 2
211981_at	2.51e-09	7.89e-11	28.5	15.4957	2.7	COL4A1	collagen type IV alpha 1 chain
214765_s_at	2.51e-09	7.91e-11	-28.5	15.4937	-2.51	NAAA	N-acylethanolamine acid amidase
212365_at	2.53e-09	7.95e-11	-28.5	15.4878	-2.29	MYO1B	myosin IB
237301_at	2.53e-09	7.96e-11	28.5	15.4873	2.32
206330_s_at	2.53e-09	7.97e-11	28.5	15.4859	2.22	SHC3	SHC adaptor protein 3
235010_at	2.54e-09	8.01e-11	28.5	15.4809	2.15	ZBED5-AS1	ZBED5 antisense RNA 1
228125_at	2.54e-09	8.01e-11	28.5	15.4807	2.62	ZSCAN30	zinc finger and SCAN domain containing 30
225548_at	2.54e-09	8.01e-11	-28.5	15.4799	-2.4	SHROOM3	shroom family member 3
201656_at	2.55e-09	8.05e-11	28.5	15.475	2.34	ITGA6	integrin subunit alpha 6
210310_s_at	2.55e-09	8.07e-11	28.5	15.4724	3.18	FGF5	fibroblast growth factor 5
203505_at	2.56e-09	8.12e-11	28.4	15.4667	3.03	ABCA1	ATP binding cassette subfamily A member 1
214866_at	2.57e-09	8.13e-11	28.4	15.4653	3.02	PLAUR	plasminogen activator, urokinase receptor
206110_at	2.57e-09	8.13e-11	-28.4	15.4644	-2.61	HIST1H3F///HIST1H3B///HIST1H3H///HIST1H3J///HIST1H3G///HIST1H3I///HIST1H3E///HIST1H3C///HIST1H3D///HIST1H3A	histone cluster 1, H3f///histone cluster 1, H3b///histone cluster 1, H3h///histone cluster 1, H3j///histone cluster 1, H3g///histone cluster 1, H3i///histone cluster 1, H3e///histone cluster 1, H3c///histone cluster 1, H3d///histone cluster 1, H3a
233011_at	2.57e-09	8.14e-11	28.4	15.4634	3.97	ANXA1	annexin A1
205996_s_at	2.57e-09	8.14e-11	28.4	15.4634	3.32	AK2	adenylate kinase 2
230831_at	2.57e-09	8.15e-11	28.4	15.4623	2.72	FRMD5	FERM domain containing 5
230093_at	2.57e-09	8.16e-11	-28.4	15.4604	-2.07	RSPH1	radial spoke head 1 homolog
236778_at	2.58e-09	8.19e-11	28.4	15.4576	3.71
1553798_a_at	2.59e-09	8.23e-11	28.4	15.452	3.35	FBXL13	F-box and leucine rich repeat protein 13
203306_s_at	2.61e-09	8.3e-11	-28.4	15.443	-2.15	SLC35A1	solute carrier family 35 member A1
202013_s_at	2.62e-09	8.34e-11	28.4	15.4385	2.34	EXT2	exostosin glycosyltransferase 2
207006_s_at	2.62e-09	8.35e-11	28.4	15.4367	2.45	CCDC106	coiled-coil domain containing 106
202014_at	2.62e-09	8.36e-11	28.4	15.4352	2.9	PPP1R15A	protein phosphatase 1 regulatory subunit 15A
224361_s_at	2.64e-09	8.41e-11	-28.3	15.4295	-2.7	IL17RB	interleukin 17 receptor B
243579_at	2.64e-09	8.42e-11	-28.3	15.4276	-2.11	MSI2	musashi RNA binding protein 2
204490_s_at	2.65e-09	8.46e-11	28.3	15.4225	2.08	CD44	CD44 molecule (Indian blood group)
219411_at	2.65e-09	8.47e-11	-28.3	15.422	-2.85	ELMO3	engulfment and cell motility 3
226438_at	2.66e-09	8.5e-11	28.3	15.4184	3.29	SNTB1	syntrophin beta 1
212158_at	2.66e-09	8.52e-11	28.3	15.4158	2.07	SDC2	syndecan 2
1552489_s_at	2.67e-09	8.53e-11	28.3	15.4146	2.79	MPP4	membrane palmitoylated protein 4
200995_at	2.69e-09	8.61e-11	28.3	15.4049	2.06	IPO7	importin 7
207177_at	2.69e-09	8.61e-11	28.3	15.4039	2.41	PTGFR	prostaglandin F receptor
228557_at	2.7e-09	8.66e-11	28.3	15.3989	3.02	L3MBTL4	l(3)mbt-like 4 (Drosophila)
226279_at	2.7e-09	8.66e-11	28.3	15.3986	2.11	PRSS23	protease, serine 23
44702_at	2.71e-09	8.68e-11	28.3	15.3961	2.53	SYDE1	synapse defective Rho GTPase homolog 1
227948_at	2.71e-09	8.71e-11	-28.2	15.3918	-2.26	FGD4	FYVE, RhoGEF and PH domain containing 4
201042_at	2.71e-09	8.72e-11	28.2	15.3914	2.89	TGM2	transglutaminase 2
206280_at	2.72e-09	8.72e-11	28.2	15.3905	2.56	CDH18	cadherin 18
227606_s_at	2.72e-09	8.75e-11	28.2	15.388	3.4	STAMBPL1	STAM binding protein like 1
224911_s_at	2.72e-09	8.75e-11	28.2	15.3878	2.36	DCBLD2	discoidin, CUB and LCCL domain containing 2
219946_x_at	2.74e-09	8.81e-11	-28.2	15.3803	-2.4	MYH14	myosin, heavy chain 14, non-muscle
228642_at	2.74e-09	8.81e-11	-28.2	15.3799	-2.47	HOTAIRM1	HOXA transcript antisense RNA, myeloid-specific 1
205286_at	2.76e-09	8.89e-11	-28.2	15.371	-2.24	TFAP2C	transcription factor AP-2 gamma
243541_at	2.77e-09	8.92e-11	28.2	15.3676	2.5	IL31RA	interleukin 31 receptor A
211527_x_at	2.79e-09	8.99e-11	28.2	15.359	3.08	VEGFA	vascular endothelial growth factor A
225544_at	2.79e-09	9.01e-11	-28.1	15.3571	-2.11	TBX3	T-box 3
206513_at	2.79e-09	9.02e-11	28.1	15.3555	3.22	AIM2	absent in melanoma 2
222361_at	2.79e-09	9.02e-11	-28.1	15.3553	-2.18	TUBBP5	tubulin beta pseudogene 5
205154_at	2.8e-09	9.07e-11	-28.1	15.3498	-2.81	LRRN2	leucine rich repeat neuronal 2
228286_at	2.81e-09	9.08e-11	-28.1	15.3483	-2.55	GEN1	GEN1, Holliday junction 5' flap endonuclease
225407_at	2.82e-09	9.15e-11	28.1	15.341	2.25	MBP	myelin basic protein
238576_at	2.84e-09	9.2e-11	28.1	15.3346	2.86	MOCOS	molybdenum cofactor sulfurase
202831_at	2.84e-09	9.21e-11	-28.1	15.3341	-2.31	GPX2	glutathione peroxidase 2
235944_at	2.85e-09	9.24e-11	-28.1	15.3305	-2.75	HMCN1	hemicentin 1
205578_at	2.85e-09	9.26e-11	-28.1	15.3283	-2.78	ROR2	receptor tyrosine kinase like orphan receptor 2
243806_at	2.86e-09	9.27e-11	-28.1	15.3266	-2.75
209388_at	2.86e-09	9.29e-11	-28.1	15.3246	-2.27	PAPOLA	poly(A) polymerase alpha
211434_s_at	2.86e-09	9.29e-11	28.1	15.324	2.15	CCRL2	C-C motif chemokine receptor like 2
215667_x_at	2.87e-09	9.34e-11	-28	15.3187	-2.03	PMS2P9///PMS2P5	PMS1 homolog 2, mismatch repair system component pseudogene 9///PMS1 homolog 2, mismatch repair system component pseudogene 5
241763_s_at	2.87e-09	9.34e-11	28	15.3184	2.79	FBXO32	F-box protein 32
219229_at	2.87e-09	9.35e-11	-28	15.318	-2.3	SLCO3A1	solute carrier organic anion transporter family member 3A1
220308_at	2.88e-09	9.37e-11	28	15.315	2.45	CFAP45	cilia and flagella associated protein 45
209586_s_at	2.88e-09	9.38e-11	-28	15.3141	-2.26	PRUNE1	prune exopolyphosphatase
237465_at	2.88e-09	9.39e-11	28	15.3132	2.1	USP53	ubiquitin specific peptidase 53
1553602_at	2.9e-09	9.47e-11	-28	15.3039	-2.39	MUCL1	mucin like 1
205372_at	2.92e-09	9.52e-11	28	15.2991	3.98	PLAG1	PLAG1 zinc finger
239350_at	2.92e-09	9.54e-11	-28	15.2966	-2.77	MARVELD3	MARVEL domain containing 3
238489_at	2.92e-09	9.55e-11	28	15.2952	2.47	PRKAA2	protein kinase AMP-activated catalytic subunit alpha 2
232083_at	2.93e-09	9.57e-11	-28	15.2931	-2.27	KIF16B	kinesin family member 16B
200670_at	2.93e-09	9.59e-11	-28	15.2913	-2.16	XBP1	X-box binding protein 1
236459_at	2.93e-09	9.6e-11	-28	15.2897	-2.06	PRKCE	protein kinase C epsilon
237047_at	2.94e-09	9.63e-11	28	15.2866	2.83	FAM230C	family with sequence similarity 230 member C
201649_at	2.95e-09	9.66e-11	27.9	15.2838	2.15	UBE2L6	ubiquitin conjugating enzyme E2 L6
209163_at	2.95e-09	9.66e-11	-27.9	15.2829	-2.23	CYB561	cytochrome b561
211564_s_at	2.96e-09	9.71e-11	27.9	15.2775	4.47	PDLIM4	PDZ and LIM domain 4
1552685_a_at	2.98e-09	9.77e-11	-27.9	15.2709	-2.41	GRHL1	grainyhead like transcription factor 1
229694_at	2.98e-09	9.79e-11	27.9	15.2696	2.31	WDR11	WD repeat domain 11
221760_at	2.99e-09	9.82e-11	-27.9	15.2663	-2.61	MAN1A1	mannosidase alpha class 1A member 1
1552712_a_at	3.02e-09	9.92e-11	27.9	15.2549	2.5	NMNAT2	nicotinamide nucleotide adenylyltransferase 2
212560_at	3.03e-09	9.98e-11	-27.9	15.2492	-3.16	SORL1	sortilin related receptor 1
204906_at	3.03e-09	9.98e-11	27.9	15.2489	2.4	RPS6KA2	ribosomal protein S6 kinase A2
210108_at	3.04e-09	1e-10	-27.8	15.2464	-2.33	CACNA1D	calcium voltage-gated channel subunit alpha1 D
242871_at	3.04e-09	1e-10	27.8	15.243	2.72	PAQR5	progestin and adipoQ receptor family member 5
231577_s_at	3.04e-09	1e-10	27.8	15.2429	3.77	GBP1	guanylate binding protein 1
218298_s_at	3.05e-09	1.01e-10	27.8	15.2416	2.45	C14orf159	chromosome 14 open reading frame 159
227697_at	3.08e-09	1.02e-10	27.8	15.2284	2.73	SOCS3	suppressor of cytokine signaling 3
1566968_at	3.09e-09	1.02e-10	27.8	15.2268	2.75	SPRY4-IT1	SPRY4 intronic transcript 1
203035_s_at	3.09e-09	1.02e-10	-27.8	15.2257	-2.47	PIAS3	protein inhibitor of activated STAT 3
226179_at	3.09e-09	1.02e-10	27.8	15.2255	2.44	SLC25A37	solute carrier family 25 member 37
225173_at	3.09e-09	1.02e-10	27.8	15.2237	4.83	ARHGAP18	Rho GTPase activating protein 18
227785_at	3.09e-09	1.02e-10	27.8	15.2234	2.7	SDCCAG8	serologically defined colon cancer antigen 8
204702_s_at	3.12e-09	1.03e-10	27.8	15.2133	2.46	NFE2L3	nuclear factor, erythroid 2 like 3
213541_s_at	3.13e-09	1.04e-10	-27.7	15.2099	-2.18	ERG	ERG, ETS transcription factor
208971_at	3.13e-09	1.04e-10	27.7	15.2081	2.82	UROD	uroporphyrinogen decarboxylase
212998_x_at	3.14e-09	1.04e-10	-27.7	15.205	-2.23	LOC101060835///HLA-DQB1	HLA class II histocompatibility antigen, DQ beta 1 chain-like///major histocompatibility complex, class II, DQ beta 1
226961_at	3.14e-09	1.04e-10	-27.7	15.2046	-2.17	PRR15	proline rich 15
227925_at	3.15e-09	1.05e-10	-27.7	15.2004	-2.15	ST3GAL4-AS1	ST3GAL4 antisense RNA 1 (head to head)
212463_at	3.15e-09	1.05e-10	27.7	15.1994	2.63	CD59	CD59 molecule
203879_at	3.16e-09	1.05e-10	27.7	15.1956	3.13	PIK3CD	phosphatidylinositol-4,5-bisphosphate 3-kinase catalytic subunit delta
213773_x_at	3.18e-09	1.06e-10	-27.7	15.1875	-1.99	NSUN5	NOP2/Sun RNA methyltransferase family member 5
229533_x_at	3.18e-09	1.06e-10	-27.7	15.186	-2.31	ZNF680	zinc finger protein 680
204794_at	3.18e-09	1.06e-10	-27.7	15.1858	-2.22	DUSP2	dual specificity phosphatase 2
242224_at	3.18e-09	1.06e-10	-27.7	15.1852	-3.53	GPATCH2	G-patch domain containing 2
244503_at	3.2e-09	1.07e-10	27.7	15.1779	2.59
228453_at	3.2e-09	1.07e-10	27.7	15.1769	2.44	EPG5	ectopic P-granules autophagy protein 5 homolog
218928_s_at	3.2e-09	1.07e-10	-27.7	15.176	-2.82	SLC37A1	solute carrier family 37 member 1
227721_at	3.2e-09	1.07e-10	-27.7	15.1756	-2.06	CPAMD8	C3 and PZP like, alpha-2-macroglobulin domain containing 8
205590_at	3.2e-09	1.07e-10	-27.7	15.1748	-2.78	RASGRP1	RAS guanyl releasing protein 1
243704_at	3.21e-09	1.07e-10	-27.7	15.1737	-2.92	GPATCH2	G-patch domain containing 2
202510_s_at	3.24e-09	1.08e-10	27.6	15.1614	2.63	TNFAIP2	TNF alpha induced protein 2
224414_s_at	3.25e-09	1.09e-10	27.6	15.1594	2.5	CARD6	caspase recruitment domain family member 6
227544_at	3.28e-09	1.1e-10	-27.6	15.1493	-2.17	TMEM229B	transmembrane protein 229B
227613_at	3.28e-09	1.1e-10	27.6	15.1472	2.18	ZNF331	zinc finger protein 331
225378_at	3.29e-09	1.1e-10	-27.6	15.1445	-1.98	VPS37A	VPS37A, ESCRT-I subunit
202074_s_at	3.32e-09	1.12e-10	27.5	15.132	2.07	OPTN	optineurin
205076_s_at	3.32e-09	1.12e-10	27.5	15.1316	2.35	MTMR11	myotubularin related protein 11
226748_at	3.33e-09	1.12e-10	-27.5	15.1302	-2.23	LYSMD2	LysM domain containing 2
223367_at	3.33e-09	1.12e-10	-27.5	15.1271	-2.07	DNAJC30	DnaJ heat shock protein family (Hsp40) member C30
224341_x_at	3.33e-09	1.12e-10	27.5	15.1271	2.71	TLR4	toll like receptor 4
239484_at	3.34e-09	1.12e-10	-27.5	15.1244	-2	TRPM7	transient receptor potential cation channel subfamily M member 7
240616_at	3.35e-09	1.13e-10	-27.5	15.122	-2.19
208634_s_at	3.38e-09	1.14e-10	27.5	15.1114	2.28	MACF1	microtubule-actin crosslinking factor 1
213234_at	3.38e-09	1.14e-10	-27.5	15.1104	-2.17	FAM234B	family with sequence similarity 234 member B
205380_at	3.4e-09	1.15e-10	-27.5	15.1024	-2.32	PDZK1	PDZ domain containing 1
201278_at	3.4e-09	1.15e-10	27.5	15.1022	2.92	LOC101926921///DAB2	uncharacterized LOC101926921///DAB2, clathrin adaptor protein
203911_at	3.4e-09	1.15e-10	-27.5	15.1013	-2.44	RAP1GAP	RAP1 GTPase activating protein
239942_at	3.41e-09	1.15e-10	27.5	15.0992	2.23	GNG11	G protein subunit gamma 11
204615_x_at	3.41e-09	1.15e-10	-27.4	15.0977	-2.16	IDI1	isopentenyl-diphosphate delta isomerase 1
205958_x_at	3.41e-09	1.15e-10	-27.4	15.0966	-2.28	CSHL1	chorionic somatomammotropin hormone like 1
209338_at	3.41e-09	1.15e-10	27.4	15.096	2.86	TFCP2	transcription factor CP2
230964_at	3.42e-09	1.16e-10	-27.4	15.0932	-3.48	FREM2	FRAS1 related extracellular matrix protein 2
202369_s_at	3.43e-09	1.16e-10	27.4	15.0884	2.01	TRAM2	translocation associated membrane protein 2
228606_at	3.44e-09	1.17e-10	-27.4	15.0859	-2.68	TCTEX1D2	Tctex1 domain containing 2
228339_at	3.44e-09	1.17e-10	27.4	15.0851	3.9	ECSCR	endothelial cell surface expressed chemotaxis and apoptosis regulator
205054_at	3.44e-09	1.17e-10	-27.4	15.0839	-2.52	NEB	nebulin
1570155_at	3.45e-09	1.17e-10	27.4	15.0811	2.66	LINC01111	long intergenic non-protein coding RNA 1111
226420_at	3.46e-09	1.17e-10	27.4	15.0778	3.07	MECOM	MDS1 and EVI1 complex locus
222895_s_at	3.46e-09	1.17e-10	-27.4	15.0773	-3.14	BCL11B	B-cell CLL/lymphoma 11B
219710_at	3.46e-09	1.18e-10	27.4	15.0764	2.05	SH3TC2	SH3 domain and tetratricopeptide repeats 2
207719_x_at	3.47e-09	1.18e-10	27.4	15.0716	2.1	CEP170P1///CEP170	centrosomal protein 170 pseudogene 1///centrosomal protein 170
223377_x_at	3.48e-09	1.19e-10	-27.4	15.0677	-2.28	CISH	cytokine inducible SH2 containing protein
210852_s_at	3.48e-09	1.19e-10	27.4	15.0675	2.96	AASS	aminoadipate-semialdehyde synthase
235244_at	3.48e-09	1.19e-10	-27.4	15.0674	-2.93	CCDC58	coiled-coil domain containing 58
222315_at	3.48e-09	1.19e-10	-27.4	15.0666	-2.51	LOC100996756	uncharacterized LOC100996756
219255_x_at	3.48e-09	1.19e-10	-27.4	15.0652	-3.12	IL17RB	interleukin 17 receptor B
219936_s_at	3.49e-09	1.19e-10	-27.4	15.0629	-2.18	GPR87	G protein-coupled receptor 87
209765_at	3.49e-09	1.19e-10	27.4	15.0623	3.2	ADAM19	ADAM metallopeptidase domain 19
222992_s_at	3.49e-09	1.19e-10	-27.3	15.0602	-1.94	NDUFB9	NADH:ubiquinone oxidoreductase subunit B9
218086_at	3.49e-09	1.19e-10	-27.3	15.0601	-3.17	NPDC1	neural proliferation, differentiation and control 1
219832_s_at	3.49e-09	1.19e-10	-27.3	15.0594	-2.81	HOXC13	homeobox C13
242521_at	3.52e-09	1.2e-10	27.3	15.0516	2.06	CARD8-AS1	CARD8 antisense RNA 1
225316_at	3.52e-09	1.2e-10	27.3	15.0515	2.42	MFSD2A	major facilitator superfamily domain containing 2A
235534_at	3.52e-09	1.21e-10	-27.3	15.0498	-2.91	PHLDA3	pleckstrin homology like domain family A member 3
214894_x_at	3.54e-09	1.21e-10	27.3	15.045	2.31	MACF1	microtubule-actin crosslinking factor 1
210792_x_at	3.55e-09	1.22e-10	-27.3	15.0411	-1.99	SIVA1	SIVA1 apoptosis inducing factor
1554334_a_at	3.55e-09	1.22e-10	-27.3	15.0388	-2.62	DNAJA4	DnaJ heat shock protein family (Hsp40) member A4
210915_x_at	3.57e-09	1.22e-10	27.3	15.0334	2.13	TRBC1	T cell receptor beta constant 1
210663_s_at	3.57e-09	1.23e-10	-27.3	15.0312	-3.12	KYNU	kynureninase
201193_at	3.58e-09	1.23e-10	-27.3	15.0282	-1.98	IDH1	isocitrate dehydrogenase (NADP(+)) 1, cytosolic
226065_at	3.59e-09	1.23e-10	27.3	15.0249	2.05	PRICKLE1	prickle planar cell polarity protein 1
1558692_at	3.59e-09	1.24e-10	27.3	15.0242	2.55	GLMP	glycosylated lysosomal membrane protein
238819_at	3.61e-09	1.24e-10	27.2	15.019	2.76	ZNF347	zinc finger protein 347
209263_x_at	3.61e-09	1.24e-10	27.2	15.0172	2.2	TSPAN4	tetraspanin 4
207808_s_at	3.63e-09	1.25e-10	27.2	15.0127	3.33	PROS1	protein S (alpha)
219461_at	3.63e-09	1.25e-10	-27.2	15.0099	-2.74	PAK6	p21 (RAC1) activated kinase 6
34726_at	3.63e-09	1.25e-10	-27.2	15.009	-1.99	CACNB3	calcium voltage-gated channel auxiliary subunit beta 3
40837_at	3.64e-09	1.26e-10	-27.2	15.0067	-2.52	TLE2	transducin like enhancer of split 2
210113_s_at	3.64e-09	1.26e-10	27.2	15.0052	2.63	NLRP1	NLR family pyrin domain containing 1
212446_s_at	3.65e-09	1.26e-10	-27.2	15.0042	-2	CERS6	ceramide synthase 6
220214_at	3.65e-09	1.26e-10	27.2	15.0023	3.05	ZNF215	zinc finger protein 215
220123_at	3.65e-09	1.26e-10	-27.2	15.0023	-2.23	SLC35F5	solute carrier family 35 member F5
1558942_at	3.65e-09	1.26e-10	27.2	15.0013	2.53	ZNF765	zinc finger protein 765
242979_at	3.65e-09	1.26e-10	-27.2	15	-2.43	IRS1	insulin receptor substrate 1
226484_at	3.66e-09	1.27e-10	27.2	14.9982	2.6	ZBTB47	zinc finger and BTB domain containing 47
211695_x_at	3.66e-09	1.27e-10	-27.2	14.9972	-2.71	MUC1	mucin 1, cell surface associated
218034_at	3.66e-09	1.27e-10	-27.2	14.9952	-2.08	FIS1	fission, mitochondrial 1
202052_s_at	3.68e-09	1.27e-10	27.2	14.9909	2.16	RAI14	retinoic acid induced 14
225342_at	3.69e-09	1.28e-10	27.2	14.9866	2.25	LOC100507855///AK4	adenylate kinase 4, mitochondrial-like///adenylate kinase 4
230345_at	3.7e-09	1.28e-10	27.1	14.9836	2.22	SEMA7A	semaphorin 7A (John Milton Hagen blood group)
212093_s_at	3.72e-09	1.29e-10	-27.1	14.9779	-2.72	MTUS1	microtubule associated tumor suppressor 1
204979_s_at	3.72e-09	1.29e-10	-27.1	14.9764	-2.28	SH3BGR	SH3 domain binding glutamate rich protein
203556_at	3.73e-09	1.3e-10	-27.1	14.9735	-2.11	ZHX2	zinc fingers and homeoboxes 2
215044_s_at	3.74e-09	1.3e-10	-27.1	14.9681	-2.25	STAM2	signal transducing adaptor molecule 2
1558279_a_at	3.77e-09	1.31e-10	27.1	14.9596	2.39	KDSR	3-ketodihydrosphingosine reductase
35147_at	3.78e-09	1.32e-10	-27.1	14.9577	-2.13	MCF2L	MCF.2 cell line derived transforming sequence like
225981_at	3.78e-09	1.32e-10	-27.1	14.9558	-2.44	HID1	HID1 domain containing
226833_at	3.8e-09	1.32e-10	-27.1	14.9511	-2.43	CYB5D1	cytochrome b5 domain containing 1
209269_s_at	3.8e-09	1.33e-10	-27.1	14.9493	-2.34	SYK	spleen associated tyrosine kinase
1554536_at	3.81e-09	1.33e-10	27	14.9456	3.25	DPYD	dihydropyrimidine dehydrogenase
217599_s_at	3.82e-09	1.33e-10	27	14.9439	2.7	MDFIC	MyoD family inhibitor domain containing
212486_s_at	3.84e-09	1.34e-10	27	14.9374	3.34	FYN	FYN proto-oncogene, Src family tyrosine kinase
205573_s_at	3.86e-09	1.35e-10	27	14.932	2.04	SNX7	sorting nexin 7
212758_s_at	3.87e-09	1.35e-10	27	14.929	4.29	ZEB1	zinc finger E-box binding homeobox 1
235405_at	3.88e-09	1.36e-10	27	14.9246	2.07	GSTA4	glutathione S-transferase alpha 4
217564_s_at	3.88e-09	1.36e-10	27	14.924	3.14	CPS1	carbamoyl-phosphate synthase 1
222088_s_at	3.88e-09	1.36e-10	27	14.9226	3.44	SLC2A14///SLC2A3	solute carrier family 2 member 14///solute carrier family 2 member 3
229491_at	3.88e-09	1.36e-10	-27	14.9215	-2.39	SLC9B2	solute carrier family 9 member B2
213893_x_at	3.9e-09	1.37e-10	-27	14.917	-2.04	PMS2P9///PMS2P5	PMS1 homolog 2, mismatch repair system component pseudogene 9///PMS1 homolog 2, mismatch repair system component pseudogene 5
228950_s_at	3.9e-09	1.37e-10	27	14.9169	3.34	WLS	wntless Wnt ligand secretion mediator
208342_x_at	3.91e-09	1.37e-10	-27	14.9142	-2	CSH2///CSH1	chorionic somatomammotropin hormone 2///chorionic somatomammotropin hormone 1
221689_s_at	3.91e-09	1.37e-10	-27	14.9117	-2.05	PIGP	phosphatidylinositol glycan anchor biosynthesis class P
235899_at	3.91e-09	1.37e-10	27	14.9112	2.31	LOC100507258///CA13	uncharacterized LOC100507258///carbonic anhydrase 13
203053_at	3.92e-09	1.38e-10	-26.9	14.9079	-1.93	BCAS2	breast carcinoma amplified sequence 2
209083_at	3.92e-09	1.38e-10	-26.9	14.9072	-2.53	CORO1A	coronin 1A
203489_at	3.94e-09	1.39e-10	-26.9	14.9026	-2.22	SIVA1	SIVA1 apoptosis inducing factor
225710_at	3.94e-09	1.39e-10	26.9	14.9014	2.37	GNB4	G protein subunit beta 4
201185_at	3.95e-09	1.39e-10	26.9	14.8997	1.96	HTRA1	HtrA serine peptidase 1
221880_s_at	3.98e-09	1.4e-10	-26.9	14.8901	-2.39	FAM174B	family with sequence similarity 174 member B
202096_s_at	3.99e-09	1.41e-10	26.9	14.8871	2.88	TSPO	translocator protein
225660_at	3.99e-09	1.41e-10	-26.9	14.8857	-3.94	SEMA6A	semaphorin 6A
221927_s_at	4e-09	1.41e-10	-26.9	14.8837	-2.74	ABHD11	abhydrolase domain containing 11
213388_at	4e-09	1.41e-10	-26.9	14.8826	-2.67	LOC101930416///LOC101929792///LOC100996724///PDE4DIP	myomegalin-like///uncharacterized LOC101929792///phosphodiesterase 4D interacting protein-like///phosphodiesterase 4D interacting protein
209310_s_at	4e-09	1.41e-10	26.9	14.8826	3.73	CASP4	caspase 4
235028_at	4.01e-09	1.42e-10	-26.9	14.8789	-1.95
228172_at	4.01e-09	1.42e-10	26.9	14.8786	1.99	TTLL11	tubulin tyrosine ligase like 11
210187_at	4.02e-09	1.42e-10	26.9	14.8761	2.06	LOC101929368///FKBP1A	uncharacterized LOC101929368///FK506 binding protein 1A
214720_x_at	4.02e-09	1.42e-10	26.9	14.8734	2.83	SEPT10	septin 10
222582_at	4.06e-09	1.44e-10	26.8	14.8628	3	PRKAG2	protein kinase AMP-activated non-catalytic subunit gamma 2
217730_at	4.07e-09	1.44e-10	26.8	14.8606	2.66	MIR6513///TMBIM1	microRNA 6513///transmembrane BAX inhibitor motif containing 1
221211_s_at	4.08e-09	1.45e-10	26.8	14.8565	2.43	MAP3K7CL	MAP3K7 C-terminal like
210580_x_at	4.09e-09	1.45e-10	-26.8	14.853	-2.4	SLX1B-SULT1A4///SLX1A-SULT1A3///SULT1A4///SULT1A3	SLX1B-SULT1A4 readthrough (NMD candidate)///SLX1A-SULT1A3 readthrough (NMD candidate)///sulfotransferase family 1A member 4///sulfotransferase family 1A member 3
213107_at	4.11e-09	1.46e-10	-26.8	14.8491	-2.28	TNIK	TRAF2 and NCK interacting kinase
225968_at	4.11e-09	1.46e-10	-26.8	14.8485	-1.99	PRICKLE2	prickle planar cell polarity protein 2
236704_at	4.11e-09	1.46e-10	26.8	14.8457	2.43	LOC101929787	uncharacterized LOC101929787
218379_at	4.11e-09	1.46e-10	26.8	14.8456	2.06	RBM7	RNA binding motif protein 7
202901_x_at	4.12e-09	1.47e-10	26.8	14.8426	2.65	CTSS	cathepsin S
202133_at	4.13e-09	1.47e-10	26.8	14.8398	2.05	WWTR1	WW domain containing transcription regulator 1
228241_at	4.14e-09	1.47e-10	-26.8	14.8374	-2.24	AGR3	anterior gradient 3, protein disulphide isomerase family member
1555935_s_at	4.14e-09	1.48e-10	-26.8	14.8365	-2.81	HUNK	hormonally up-regulated Neu-associated kinase
209094_at	4.14e-09	1.48e-10	26.8	14.8358	2.09	DDAH1	dimethylarginine dimethylaminohydrolase 1
231914_at	4.14e-09	1.48e-10	-26.8	14.8356	-2.23	NUDT14	nudix hydrolase 14
244864_at	4.15e-09	1.48e-10	26.8	14.8328	2.36	LOC101929475	uncharacterized LOC101929475
202708_s_at	4.18e-09	1.49e-10	-26.7	14.8248	-3.84	HIST2H2BE	histone cluster 2, H2be
1557961_s_at	4.2e-09	1.5e-10	-26.7	14.8201	-2.87	C8orf88	chromosome 8 open reading frame 88
205794_s_at	4.2e-09	1.5e-10	-26.7	14.818	-1.96	NOVA1	NOVA alternative splicing regulator 1
244829_at	4.2e-09	1.5e-10	26.7	14.8172	2.23	LINC00518	long intergenic non-protein coding RNA 518
205497_at	4.2e-09	1.5e-10	26.7	14.8168	2.12	ZNF175	zinc finger protein 175
201428_at	4.2e-09	1.5e-10	-26.7	14.8164	-2.31	CLDN4	claudin 4
224783_at	4.21e-09	1.51e-10	26.7	14.8133	2.04	UBALD2	UBA like domain containing 2
209039_x_at	4.22e-09	1.51e-10	26.7	14.8104	1.94	EHD1	EH domain containing 1
206243_at	4.24e-09	1.52e-10	26.7	14.8055	2.21	TIMP4	TIMP metallopeptidase inhibitor 4
227080_at	4.25e-09	1.52e-10	26.7	14.8023	2.28	ZNF697	zinc finger protein 697
210891_s_at	4.25e-09	1.53e-10	-26.7	14.8016	-2.02	GTF2IP4///GTF2IP1///GTF2I	general transcription factor IIi pseudogene 4///general transcription factor IIi pseudogene 1///general transcription factor IIi
227867_at	4.26e-09	1.53e-10	26.7	14.7993	2.88	TRABD2A	TraB domain containing 2A
227232_at	4.26e-09	1.53e-10	-26.7	14.7985	-2.46	EVL	Enah/Vasp-like
235691_at	4.26e-09	1.53e-10	26.7	14.7981	2.45	LOC729970	hCG2028352-like
236075_s_at	4.28e-09	1.54e-10	-26.6	14.7915	-2.54	LOC101928000	uncharacterized LOC101928000
226982_at	4.29e-09	1.54e-10	26.6	14.7897	2.85	ELL2	elongation factor for RNA polymerase II 2
237400_at	4.32e-09	1.55e-10	26.6	14.7817	2.83	ATP5S	ATP synthase, H+ transporting, mitochondrial Fo complex subunit s (factor B)
227840_at	4.32e-09	1.56e-10	-26.6	14.7795	-2.27	C2orf76	chromosome 2 open reading frame 76
1556063_s_at	4.32e-09	1.56e-10	26.6	14.7788	2.19	RPP30	ribonuclease P/MRP subunit p30
228765_at	4.32e-09	1.56e-10	-26.6	14.7785	-2.2	GTF2IRD2	GTF2I repeat domain containing 2
225860_at	4.34e-09	1.56e-10	26.6	14.7751	2.7	MMP24-AS1	MMP24 antisense RNA 1
230430_at	4.34e-09	1.57e-10	-26.6	14.7737	-2.24	ENTPD2	ectonucleoside triphosphate diphosphohydrolase 2
203509_at	4.36e-09	1.57e-10	-26.6	14.7693	-2.18	SORL1	sortilin related receptor 1
234932_s_at	4.37e-09	1.58e-10	26.6	14.766	3.46	CDCP1	CUB domain containing protein 1
226348_at	4.38e-09	1.58e-10	26.6	14.7609	2.89	FUT11	fucosyltransferase 11
243829_at	4.38e-09	1.59e-10	26.6	14.7608	2.58	BRAF	B-Raf proto-oncogene, serine/threonine kinase
229850_at	4.43e-09	1.6e-10	26.5	14.7498	2.18	KDSR	3-ketodihydrosphingosine reductase
226041_at	4.43e-09	1.6e-10	-26.5	14.7497	-2.08	NAPEPLD	N-acyl phosphatidylethanolamine phospholipase D
235278_at	4.43e-09	1.6e-10	-26.5	14.7481	-2.34	MACROD2	MACRO domain containing 2
1558762_a_at	4.44e-09	1.61e-10	-26.5	14.746	-2.05	ZNF789	zinc finger protein 789
230149_at	4.44e-09	1.61e-10	26.5	14.7448	2.75
205082_s_at	4.45e-09	1.61e-10	26.5	14.7427	2.46	AOX1	aldehyde oxidase 1
210538_s_at	4.45e-09	1.62e-10	26.5	14.741	3.23	BIRC3	baculoviral IAP repeat containing 3
210879_s_at	4.46e-09	1.62e-10	26.5	14.7388	2.25	RAB11FIP5	RAB11 family interacting protein 5
1554168_a_at	4.46e-09	1.62e-10	26.5	14.7385	1.89	SH3KBP1	SH3 domain containing kinase binding protein 1
209090_s_at	4.46e-09	1.62e-10	26.5	14.7365	1.91	SH3GLB1	SH3 domain containing GRB2 like endophilin B1
219299_at	4.49e-09	1.63e-10	-26.5	14.7298	-2.99	TRMT12	tRNA methyltransferase 12 homolog
210229_s_at	4.49e-09	1.63e-10	26.5	14.7298	4.51	CSF2	colony stimulating factor 2
207285_x_at	4.49e-09	1.63e-10	-26.5	14.7285	-2.42	CSHL1	chorionic somatomammotropin hormone like 1
216347_s_at	4.49e-09	1.64e-10	-26.5	14.7274	-2.23	PPP1R13B	protein phosphatase 1 regulatory subunit 13B
211580_s_at	4.5e-09	1.64e-10	-26.5	14.7251	-2.4	PIK3R3	phosphoinositide-3-kinase regulatory subunit 3
205599_at	4.5e-09	1.64e-10	26.5	14.7245	2.2	TRAF1	TNF receptor associated factor 1
218915_at	4.5e-09	1.64e-10	-26.5	14.7235	-2.22	NF2	neurofibromin 2
229014_at	4.5e-09	1.64e-10	26.5	14.7231	2.42	NR2F1-AS1	NR2F1 antisense RNA 1
205296_at	4.5e-09	1.64e-10	26.5	14.7226	2.21	RBL1	RB transcriptional corepressor like 1
242181_at	4.5e-09	1.64e-10	-26.5	14.7219	-2.21
1555526_a_at	4.54e-09	1.66e-10	26.4	14.7132	2.26	SEPT6	septin 6
[truncated: 52,677 more rows]
